# Supplementary material for: Host–guest complexes of perylene bisimide-based metallacage and fullerenes for efficient photoinduced charge separation
Source: Royal Society of Chemistry journal article supplement (doi:10.1039/d3tc03412g), 2023-12-02
Supplement: d3tc03412g1.pdf [file d3tc03412g1.pdf]

## Supporting information for:

### Host-guest complexes of perylene bisimide-based metallacage and fullerenes for efficient photoinduced charge separation

O. A. Stasyuk<sup>a</sup>, M. Solà<sup>\*a</sup> and A. J. Stasyuk<sup>\*a,b</sup>

a. Institut de Química Computacional i Catàlisi and Departament de Química, Universitat de Girona, C/ Maria Aurèlia Capmany 69, 17003 Girona, Catalonia, Spain

b. Faculty of Chemistry, University of Warsaw, Pasteura 1, 02-093 Warsaw, Poland

#### Abstract

The discovery of coordination-driven self-assembly has greatly expanded the field of organic macrocyclic compounds. This approach enables the construction of precise supramolecular complexes, known as metallacages, assembled from organic ligands coordinated with metal centers. Metallacages come in various sizes and shapes, making them capable of hosting guest molecules of different sizes. In this work, we report the ground and excited state properties of non-covalent complexes between various fullerenes ( $C_{60}$ ,  $C_{70}$ ,  $Sc_3N@C_{80}$ ,  $Sc_3CH@C_{80}$ , and  $Sc_4O_3@C_{80}$ ) and  $Pt_6PBI_3$  metallacage, composed of perylene bisimide units and organoplatinum nodes. These complexes exhibit thermodynamically favorable photoinduced charge transfer from endohedral metallofullerenes to metallacage that occurs within picoseconds. Among the systems considered, the  $Pt_6PBI_3 \supset Sc_3N@C_{80}$  complex stands out as the most promising candidate for use in photovoltaics due to its ability to fast charge separation and slow charge recombination.

## Table of Contents

|     |                                                                                                                                                                                                                                                                                                                             |            |
|-----|-----------------------------------------------------------------------------------------------------------------------------------------------------------------------------------------------------------------------------------------------------------------------------------------------------------------------------|------------|
| 1.  | Computational methodology                                                                                                                                                                                                                                                                                                   | p. S3-S7   |
| 2.  | <b>Figure S1.</b> QTAIM molecular graphs for <b>Pt<sub>6</sub>PBI<sub>3</sub>⊃C<sub>60</sub></b> and <b>Pt<sub>6</sub>PBI<sub>3</sub>⊃C<sub>70</sub></b> complexes.                                                                                                                                                         | p. S8      |
| 3.  | <b>Figure S2.</b> Plot of RDG vs. $\text{sign}(\lambda_2) \times \rho$ for <b>Pt<sub>6</sub>PBI<sub>3</sub>⊃C<sub>60</sub></b> and <b>Pt<sub>6</sub>PBI<sub>3</sub>⊃C<sub>70</sub></b> complexes.                                                                                                                           | p. S8      |
| 4.  | <b>Figure S3.</b> NCI isosurfaces of van der Waals interactions in <b>Pt<sub>6</sub>PBI<sub>3</sub>⊃C<sub>60</sub></b> and <b>Pt<sub>6</sub>PBI<sub>3</sub>⊃C<sub>70</sub></b> complexes.                                                                                                                                   | p. S9      |
| 5.  | <b>Figure S4-S6.</b> Frontier molecular orbitals of the studied complexes                                                                                                                                                                                                                                                   | p. S9-S11  |
| 6.  | <b>Table S1.</b> Charge separation between the fragments in electronic ground state for.                                                                                                                                                                                                                                    | p. S12     |
| 7.  | <b>Table S2.</b> QTAIM parameters of selected BCPs related to non-covalent interactions in <b>Pt<sub>6</sub>PBI<sub>3</sub>⊃C<sub>60</sub></b> and <b>Pt<sub>6</sub>PBI<sub>3</sub>⊃C<sub>70</sub></b> complexes.                                                                                                           | p. S12-S13 |
| 8.  | <b>Table S3.</b> Relative energies and solvation energies calculated for <b>Pt<sub>6</sub>PBI<sub>3</sub>⊃C<sub>60</sub></b> and <b>Pt<sub>6</sub>PBI<sub>3</sub>⊃C<sub>70</sub></b> complexes in ACN.                                                                                                                      | p. S13     |
| 9.  | <b>Table S4.</b> Computed ET rates with different effective Huang-Rhys factors for <b>Pt<sub>6</sub>PBI<sub>3</sub>⊃C<sub>60</sub></b> and <b>Pt<sub>6</sub>PBI<sub>3</sub>⊃C<sub>70</sub></b> complexes.                                                                                                                   | p. S13     |
| 10. | <b>Table S5.</b> EDA results for <b>Pt<sub>6</sub>PBI<sub>3</sub>⊃Sc<sub>3</sub>N@C<sub>80</sub></b> , <b>Pt<sub>6</sub>PBI<sub>3</sub>⊃Sc<sub>3</sub>CH@C<sub>80</sub></b> , and <b>Pt<sub>6</sub>PBI<sub>3</sub>⊃Sc<sub>4</sub>O<sub>3</sub>@C<sub>80</sub></b> complexes.                                                | p. S14     |
| 11. | <b>Table S6.</b> Relative energies and solvation energies calculated for <b>Pt<sub>6</sub>PBI<sub>3</sub>⊃Sc<sub>3</sub>N@C<sub>80</sub></b> , <b>Pt<sub>6</sub>PBI<sub>3</sub>⊃Sc<sub>3</sub>CH@C<sub>80</sub></b> , and <b>Pt<sub>6</sub>PBI<sub>3</sub>⊃Sc<sub>4</sub>O<sub>3</sub>@C<sub>80</sub></b> complexes in ACN. | p. S14     |
| 12. | <b>Table S7.</b> Charge delocalization over the fragment index (IPR) for <b>Pt<sub>6</sub>PBI<sub>3</sub>⊃Sc<sub>3</sub>N@C<sub>80</sub></b> , <b>Pt<sub>6</sub>PBI<sub>3</sub>⊃Sc<sub>3</sub>CH@C<sub>80</sub></b> , and <b>Pt<sub>6</sub>PBI<sub>3</sub>⊃Sc<sub>4</sub>O<sub>3</sub>@C<sub>80</sub></b> complexes.        | p. S14     |
| 13. | Cartesian coordinates                                                                                                                                                                                                                                                                                                       | p. S15-S50 |
| 14. | References                                                                                                                                                                                                                                                                                                                  | p. S51-S52 |

## Computational Methodology

### Quantum-chemical calculations

Geometry optimization of the complexes was performed employing the DFT BLYP<sup>1,2</sup> exchange–correlation functional with Ahlrichs' def2-SVP basis set.<sup>3,4</sup> The empirical dispersion D3 correction was computed with the Becke–Johnson damping function.<sup>5,6</sup> Vertical excitation energies were calculated using TDA formalism<sup>7</sup> with the range-separated CAM-B3LYP<sup>8</sup> functional and def2-SVP basis set,<sup>3,4</sup> as implemented in the Gaussian16 (rev. A03) program.<sup>9</sup> The same program was used for population analysis and calculation of Mulliken,<sup>10,11</sup> Lowdin,<sup>12</sup> Hirshfeld,<sup>13</sup> and CM5,<sup>14</sup> charges. Interaction energy was computed using the BLYP functional coupled with TZVP basis<sup>15</sup> for the BLYP-D3(BJ)/def2-SVP optimized geometries. Its decomposition analysis (EDA)<sup>16,17</sup> was performed using the Amsterdam Density Functional (ADF) program.<sup>18</sup> Molecular structures and frontier molecular orbitals were visualized by Chemcraft 1.8. program.<sup>19</sup>

### Energy decomposition analysis

The interaction energy between Pt<sub>6</sub>PBI<sub>3</sub> metallacage and fullerene in the gas phase was examined in the framework of the Kohn-Sham MO model using a quantitative energy decomposition into electrostatic interactions, Pauli repulsive orbital interactions and attractive orbital interactions, to which a term  $\Delta E_{disp}$  was added to account for the dispersion correction:<sup>20-22</sup>

$$\Delta E_{int} = \Delta E_{elstat} + \Delta E_{Pauli} + \Delta E_{oi} + \Delta E_{disp} \quad (1)$$

The term  $\Delta V_{elstat}$  corresponds to the classical electrostatic interactions between the unperturbed charge distributions of the prepared (i.e. deformed) fragments and is usually attractive. The Pauli repulsion,  $\Delta E_{Pauli}$ , comprises the destabilizing interactions between occupied orbitals and is responsible for any steric repulsion. The orbital interactions,  $\Delta E_{oi}$ , account for electron-pair bonding, charge transfer (i.e., donor–acceptor interactions between occupied orbitals on one moiety and unoccupied orbitals on the other, including HOMO-LUMO interactions) and polarization (empty-occupied orbital mixing on one fragment due to the presence of another fragment). The term  $\Delta E_{disp}$  accounts for the dispersion corrections.<sup>23,24</sup>

### Analysis of excited states

The quantitative analysis of exciton delocalization and charge transfer in the donor-acceptor complexes was carried out in terms of the transition density.<sup>25-27</sup> The analysis was done in the Löwdin orthogonalized basis, which is more convenient. The matrix  ${}^{\lambda}\mathbf{C}$  of orthogonalized MO coefficients is obtained from the coefficients  $\mathbf{C}$  in the original basis  ${}^{\lambda}\mathbf{C} = \mathbf{S}^{1/2} \mathbf{C}$ , where  $\mathbf{S}$  is the atomic orbital overlap matrix. The transition density matrix  $T^{0i}$  for an excited state  $\Phi_i^*$  constructed as a superposition of singly excited configurations (where an occupied MO  $\psi_j$  is replaced a virtual MO  $\psi_a$ ) is computed as,

$$T_{\alpha\beta}^{0i} = \sum_{ja} A_{j \rightarrow a} {}^{\lambda}C_{\alpha j} {}^{\lambda}C_{\beta a} \quad (2)$$

where  $A_{j \rightarrow a}$  is the expansion coefficient.

A key quantity  $\Omega(D,A)$  is determined by:

$$\Omega(D,A) = \sum_{\alpha \in D, \beta \in A} (T_{\alpha\beta}^{0i})^2 \quad (3)$$

The weights of local excitations on donor (D) and acceptor (A) are  $\Omega(D,D)$  and  $\Omega(A,A)$ . The weights of electron transfer configurations  $D \rightarrow A$  and  $A \rightarrow D$  are represented by  $\Omega(D,A)$  and  $\Omega(A,D)$ , respectively. The index  $\Delta q$ , which describes charge separation and charge transfer between D and A, is

$$\Delta q(\text{CS}) = \sum \Omega(D,A) - \Omega(A,D) \quad (4)$$

$$\Delta q(\text{CT}) = \sum \Omega(D,A) + \Omega(A,D) \quad (5)$$

### Solvent Effects

The equilibrium solvation energy  $E_s^{\text{eq}}$  of a molecule (in the ground or excited state) in the medium with the dielectric constant  $\epsilon$  was estimated using a COSMO-like polarizable continuum model<sup>28-31</sup> in the monopole approximation:

$$E_s^{\text{eq}}(\mathbf{Q}, \epsilon) = -\frac{1}{2} f(\epsilon) \mathbf{Q}^+ \mathbf{D} \mathbf{Q} \quad (6)$$

where the  $f(\epsilon)$  is the dielectric scaling factor,  $f(\epsilon) = \frac{\epsilon - 1}{\epsilon}$ ,  $\mathbf{Q}$  – the vector of  $n$  atomic charges in the molecular system,  $\mathbf{D}$  is the  $n \times n$  symmetric matrix determined by the shape of the boundary surface between solute and solvent.  $\mathbf{D} = \mathbf{B}^+ \mathbf{A}^{-1} \mathbf{B}$ , where the  $m \times m$  matrix  $\mathbf{A}$  describes electrostatic interaction between  $m$  surface charges and the  $m \times n$   $\mathbf{B}$  matrix describes the interaction of the surface charges with  $n$  atomic charges of the solute.<sup>28,32</sup> The GEPOL93 scheme<sup>33</sup> was used to construct the molecular boundary surface.

The charge on atom X in the excited state  $\Phi_i^*$ ,  $q_X^i$ , was calculated as:

$$q_X^i = q_X^0 + \Delta_X^i, \quad \Delta_X^i = \sum_{Y \neq X} \sum_{\alpha \in X, \beta \in Y} (T_{\alpha\beta}^{0i} T_{\alpha\beta}^{0i} - T_{\beta\alpha}^{0i} T_{\beta\alpha}^{0i}), \quad (7)$$

where  $q_X^0$  is the atomic charge on A in the ground state and  $\Delta_X^i$  is its change due to the redistribution of the electron density between the atoms X and the rest of atoms Y, which is caused by the excitation  $\psi_0 \rightarrow \Phi_i^*$ .

The non-equilibrium solvation energy for excited state  $\Phi_i^*$  can be estimated as:<sup>34</sup>

$$E_s^{\text{neq}}(\mathbf{Q}^0, \Delta, \epsilon, n^2) = f(\epsilon) \Delta^+ \mathbf{D} \mathbf{Q}^0 - \frac{1}{2} f(n^2) \Delta^+ \mathbf{D} \Delta, \quad (8)$$

In Eq. (8),  $n^2$  (the refraction index squared) is the optical dielectric constant of the medium and the vector  $\Delta$  describes the change of atomic charges in the molecule by excitation in terms of atomic charges, see

Eq. (7). By definition, the external (solvent) reorganization energy is the difference of the non-equilibrium (Eq. 8) and equilibrium (Eq. 6) solvation energies of the excited state.

### Electron transfer rates

The rate of the nonadiabatic electron transfer (ET),  $k_{ET}$ , can be expressed in terms of the electronic coupling squared,  $V^2$ , and the Franck-Condon Weighted Density of states (FCWD):

$$k_{ET} = \frac{2\pi}{\hbar} V^2 (FCWD) \quad (9)$$

that accounts for the overlap of vibrational states of donor and acceptor and can be approximately estimated using the classical Marcus equation:<sup>35</sup>

$$(FCWD) = (4\pi\lambda kT)^{-1/2} \exp\left[-(\Delta G^0 + \lambda)^2 / 4\lambda kT\right] \quad (10)$$

where  $\lambda$  is the reorganization energy and  $\Delta G^0$  is the standard Gibbs energy change of the process. The fragment charge difference (FCD)<sup>36,37</sup> method was employed to calculate the electronic couplings in this work.

The Marcus expression is derived for the high-temperature condition,  $\hbar\omega_l \ll kT$ , for all vibrational modes  $l$ . The semi-classical description of ET<sup>38,39</sup> includes the effect of the quantum vibrational modes in an effective way, the solvent (low frequency) modes are treated classically, while a single high-frequency intramolecular mode  $\omega_i$ ,  $\hbar\omega_i \gg kT$ , is described quantum mechanically. Because ET occurs normally from the lowest vibrational level of the initial state, the rate  $k$  can be expressed as a sum over all channels connecting the initial state with the vibrational quantum number  $n = 0$  to manifold vibrational levels of the final state,

$$k = \sum_{n=0}^{\infty} k_{0 \rightarrow n}, \text{ where } k_{0 \rightarrow n} = \frac{2\pi}{\hbar} V_{0 \rightarrow n}^2 \frac{1}{\sqrt{4\pi\lambda_s kT}} \exp\left[-\frac{(\Delta G + n\hbar\omega_i + \lambda_s)^2}{4\lambda_s kT}\right] \quad (11)$$

with

$$V_{0 \rightarrow n}^2 = V^2 \frac{S^n}{n!} \exp(-S) \quad (12)$$

An effective value of the Huang-Rhys factor  $S$  is estimated from the internal reorganization energy  $\lambda_i$ ,

$$S = \lambda_i / \hbar\omega_i$$

As seen, an additional parameter (as compared to the Marcus equation) enters the semi-classical expression - the frequency  $\omega_i$  of a vibrational mode that effectively describes the nuclear intramolecular relaxation following the ET. Typically, in organic systems (including fullerene and nanotube derivatives) the main contribution to the internal reorganization energy is due to stretching of C=C bonds (the corresponding frequencies are found to be in the range of 1400-1800  $\text{cm}^{-1}$ ). Thus, the effective frequency was set to 1600  $\text{cm}^{-1}$ . We have demonstrated that varying the parameter  $\omega_i$  within a reasonable range does not change significantly the computed ET rate (Table S4).

## Reorganization energy

The reorganization energy is usually divided into two parts,  $\lambda = \lambda_i + \lambda_s$ , including the internal and solvent terms. The solvent reorganization energy corresponds to the energy required to move solvent molecules from the position they occupy in the initial state to the location they have in the CT state, but without charge transfer having occurred. The  $\lambda_s$  for a particular CT state was computed as a difference between the equilibrium ( $E_s^{eq}$ , see eq. 6) and non-equilibrium ( $E_s^{neq}$ , see eq. 8) solvation energies. The internal reorganization energy  $\lambda_i$  corresponds to the energy of structural changes when donor/acceptor fragments going from initial-state geometries to final-state geometries.

$\lambda_i = \lambda_i^1 + \lambda_i^2$ , where :

$$\lambda_i^1(C_{60}^* \rightarrow C_{60}^+) = \frac{1}{2} \left[ \left( (C_{60}^*)_+ - (C_{60}^*)_* \right) + \left( (C_{60}^+)_* - (C_{60}^+)_+ \right) \right] \quad (13)$$

$$\lambda_i^2(Cage^0 \rightarrow Cage^-) = \frac{1}{2} \left[ \left( (Cage^0)_- - (Cage^0)_0 \right) + \left( (Cage^-)_0 - (Cage^-)_- \right) \right]$$

## Complexation, interaction and deformation energies

The interaction energies were calculated directly from the electronic energy of complex and electronic energies of its subsystems. For  $Cage \supset C_{xxx}$ , the interaction energy can be expressed as follows:

$$E_{int} = E_{Cage \supset C_{xxx}} - (E_{Cage} + E_{C_{xxx}}) \quad (14)$$

Deformation energy for each of studied complexes has been determined using following equation:

$$E_{Strain} = (E_{Cage}^{Complex geom.} - E_{Cage}^{Eq. geom.}) + (E_{C_{xxx}}^{Complex geom.} - E_{C_{xxx}}^{Eq. geom.}) \quad (15)$$

At the same time, complexation energy comprises both interaction ( $\Delta E_{int.}$ ) and deformation ( $E_{def.}$ ) energies. Thus  $\Delta E_{Complex.}$  can be represented as following:

$$E_{Complex} = E_{int} + E_{def} \quad (16)$$

## Charge delocalization index

The degree of electron delocalization in the state of interest is quantified by the inverse participation ratio (IPR):

$$IPR = \Delta q^F \left( \sum_i^n \frac{1}{(\Delta q_i^F)^2} \right) \quad (17)$$

where  $\Delta q^F$  - indicates charge difference on the fragment in CT state compare to GS, while  $(\Delta q_i^F)^2$  - corresponds to square of particular atom charge difference for denoted fragment in CT state compare to GS.

## Quantum Theory of Atoms in Molecules (QTAIM)

Topological analysis of the electron density distributions was conducted using the “Quantum Theory of Atoms in Molecules” (QTAIM) approach proposed by Bader.<sup>40,41</sup> Electron density properties measured at the bond critical point (BCP) give information about the character of different chemical bonds.<sup>42-44</sup> The AIMALL suite of programs<sup>45</sup> was applied to evaluate BCP properties and associated bond descriptors – electron density [ $\rho(r)$ ], its Laplacian [ $\nabla^2\rho(r)$ ], potential energy density [ $V(r)$ ], kinetic energy density [ $G(r)$ ], and total electron energy density [ $H(r)$ ].

## Non-covalent interaction (NCI) index

The NCI method<sup>46-48</sup> relies on two scalar fields to map local bonding properties: the electron density ( $\rho$ ) and the reduced-density gradient (RDG,  $s$ ) defined as:

$$s = \frac{1}{2(3\pi)^{1/3}} \frac{|\nabla\rho|}{\rho^{4/3}} \quad (18)$$

The combination of  $s$  and  $\rho$  allows a rough partition of real space into bonding regions: high- $s$  low- $\rho$  corresponds to non-interacting density tails, low- $s$  high- $\rho$  to covalent bonds, and low- $s$  low- $\rho$  to non-covalent interactions. The NCI analysis was carried out at the BLYP-D3(BJ)/def2-SVP level using Multiwfn program.<sup>49</sup>

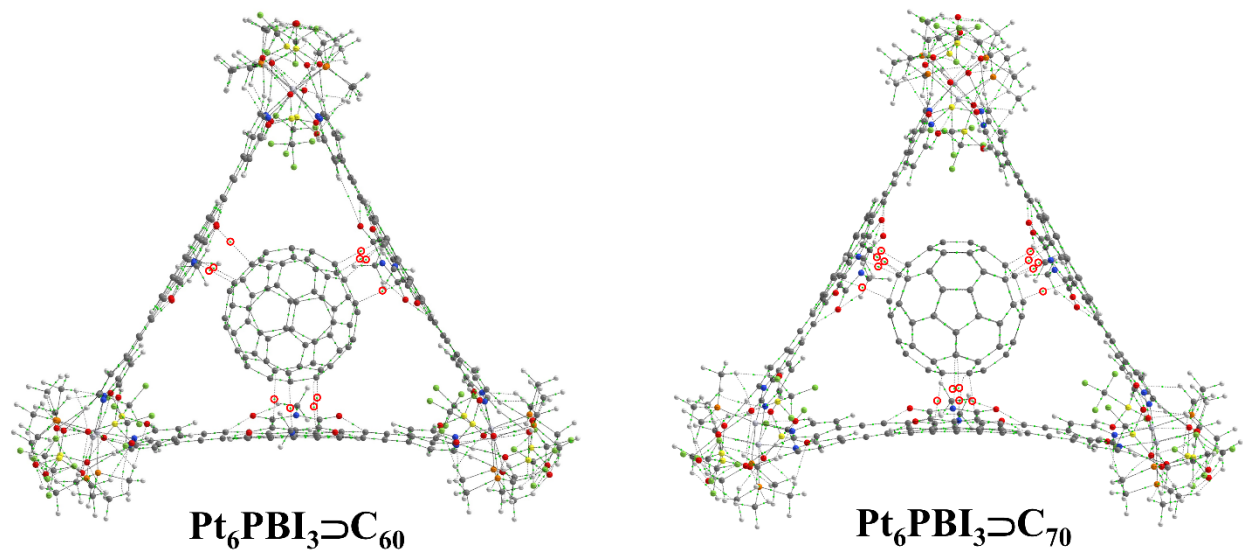

**Figure S1.** QTAIM molecular graph for **Pt<sub>6</sub>PBI<sub>3</sub>⊃C<sub>60</sub>** and **Pt<sub>6</sub>PBI<sub>3</sub>⊃C<sub>70</sub>** complexes. Lines connecting the nuclei are the bond paths. Small green dots correspond to BCPs. BCPs of interest corresponding to C...C contacts are marked by red circles.

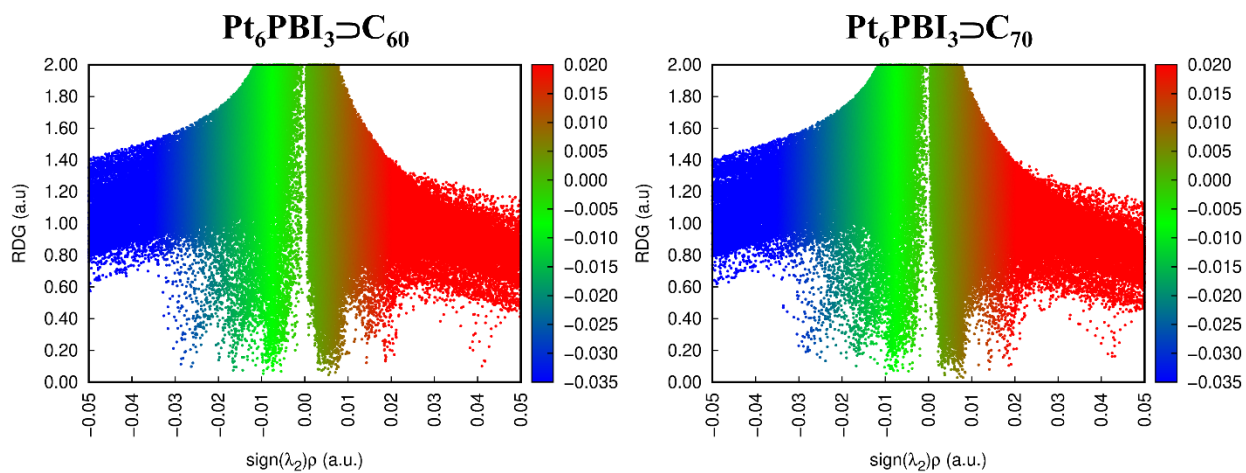

**Figure S2.** Plot of RDG vs.  $\text{sign}(\lambda_2)\rho$  for **Pt<sub>6</sub>PBI<sub>3</sub>⊃C<sub>60</sub>** and **Pt<sub>6</sub>PBI<sub>3</sub>⊃C<sub>70</sub>** complexes.



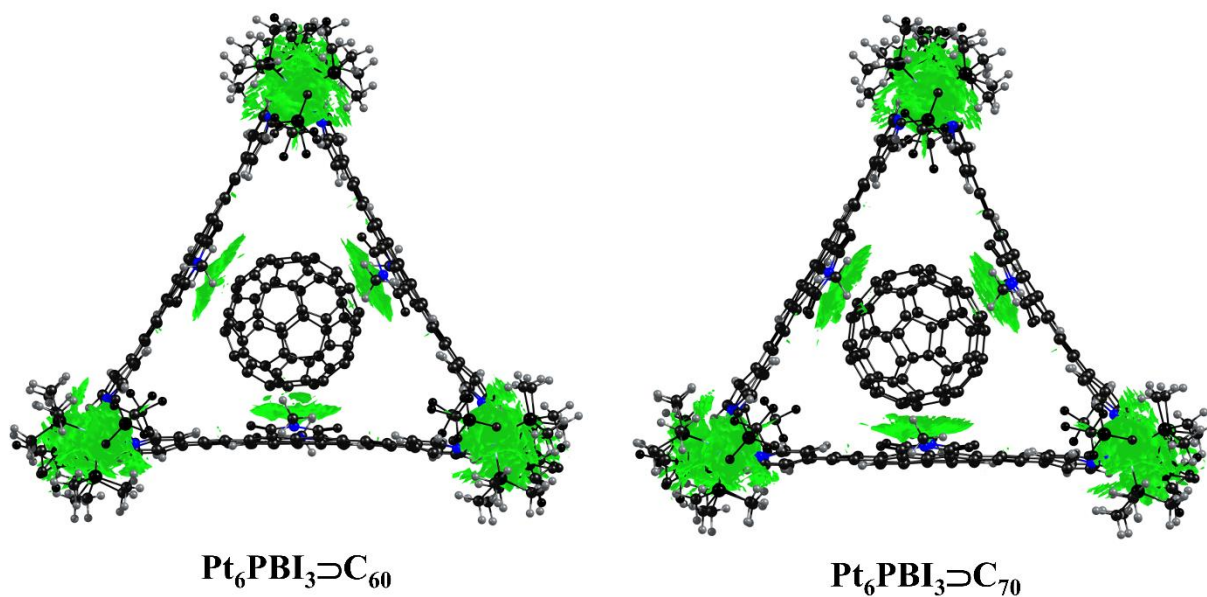

**Figure S3.** NCI isosurfaces for  $\text{Pt}_6\text{PBI}_3\supset\text{C}_{60}$  and  $\text{Pt}_6\text{PBI}_3\supset\text{C}_{70}$  complexes. Isosurfaces were generated for  $\text{RDG} = 0.65 \text{ a.u.}$

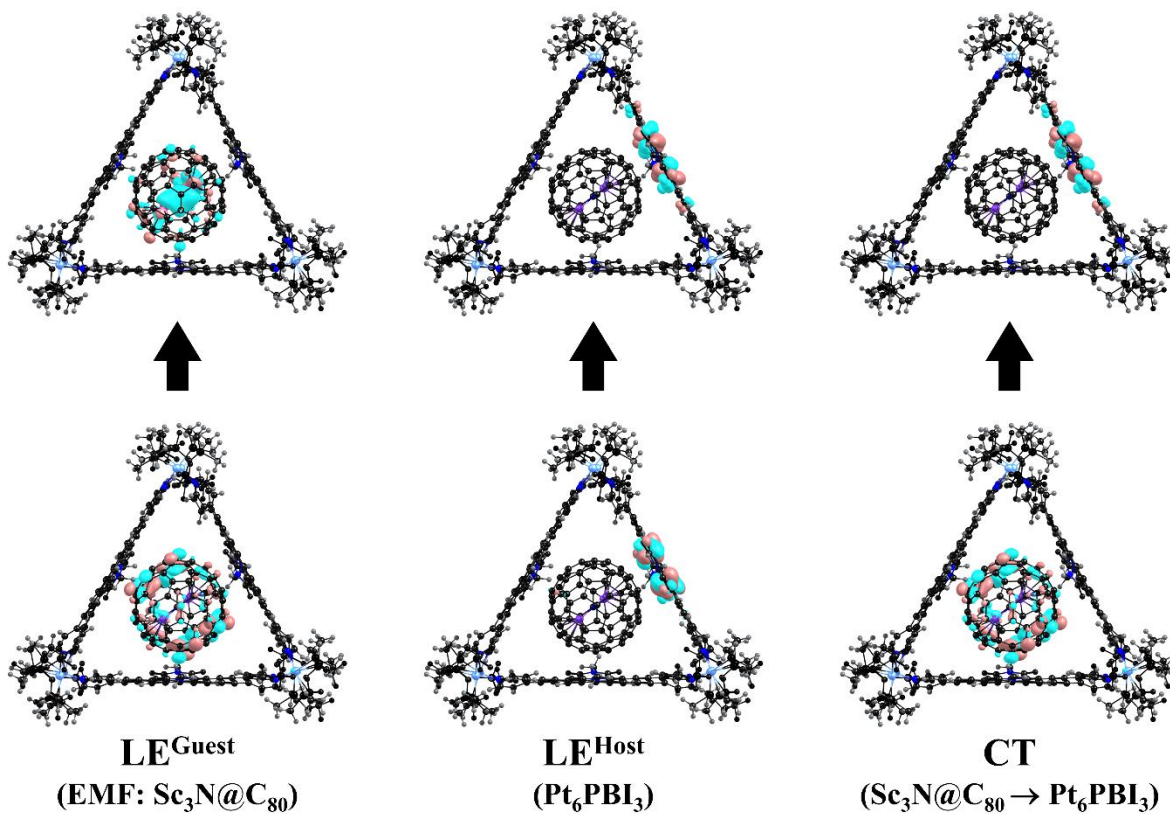

**Figure S4.** Frontier molecular orbitals representing  $\text{LE}^{\text{Guest}}$ ,  $\text{LE}^{\text{Host}}$ , and CT states in  $\text{Pt}_6\text{PBI}_3\supset\text{Sc}_3\text{N}@C_{80}$  complex.

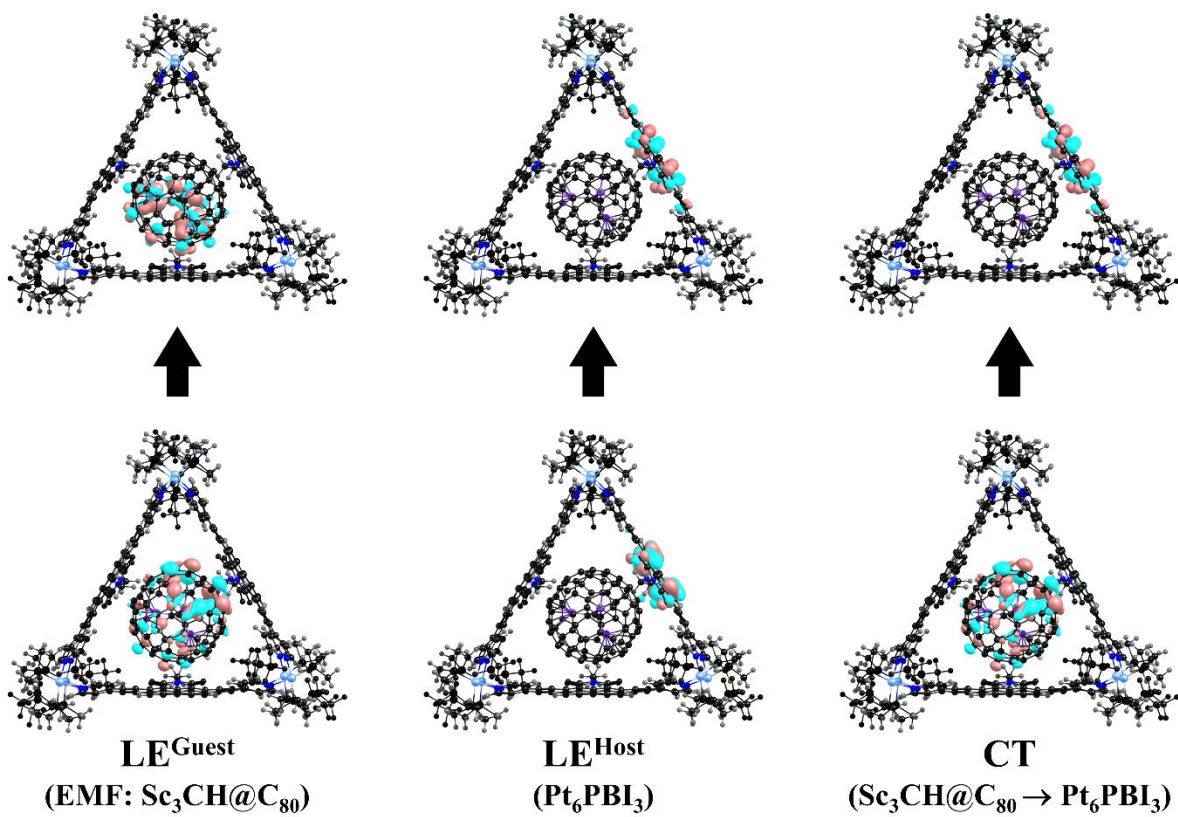

**Figure S5.** Frontier molecular orbitals representing LE<sup>Guest</sup>, LE<sup>Host</sup>, and CT states in Pt<sub>6</sub>PBI<sub>3</sub>⊃Sc<sub>3</sub>CH@C<sub>80</sub> complex.

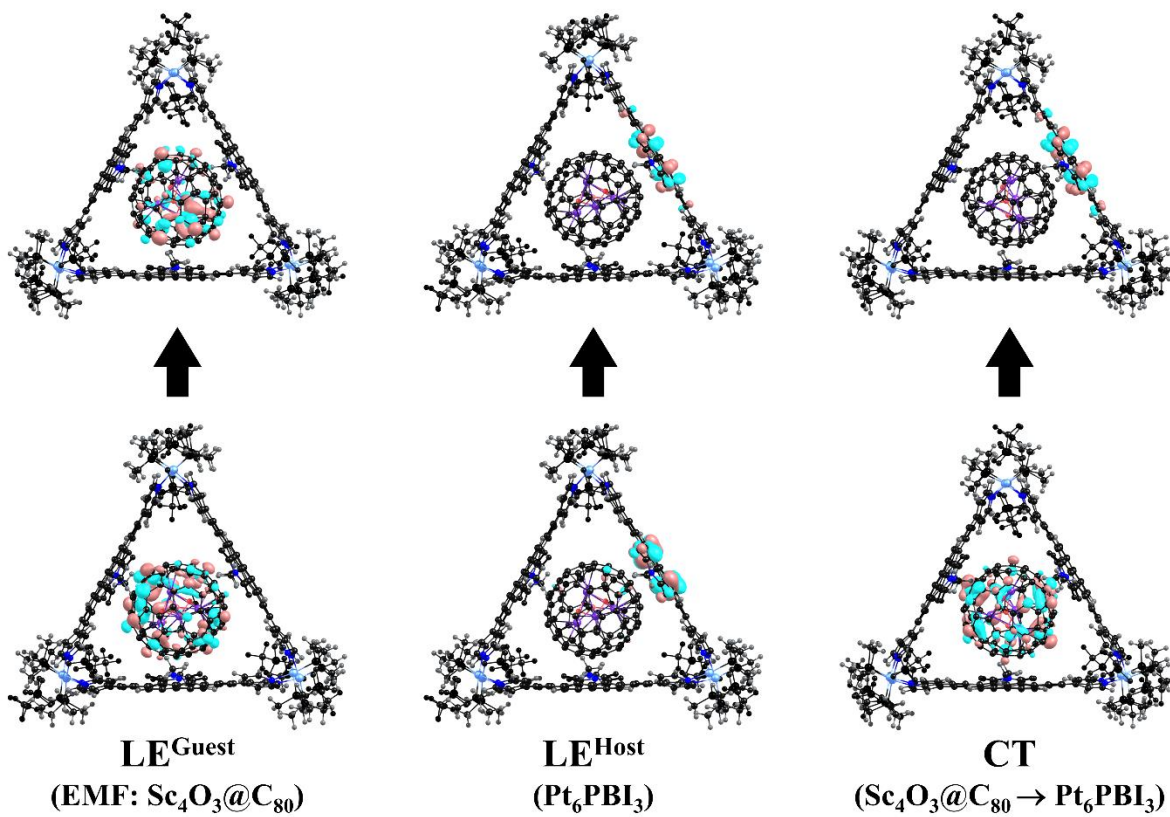

**Figure S6.** Frontier molecular orbitals representing  $\text{LE}^{\text{Guest}}$ ,  $\text{LE}^{\text{Host}}$ , and CT states in  $\text{Pt}_6\text{PBI}_3@C_{80}$  complexes.

**Table S1.** Charge separation (in electrons) between the fragments in electronic ground state for  $\text{Pt}_6\text{PBI}_3\supset\text{C}_{60}$  and  $\text{Pt}_6\text{PBI}_3\supset\text{C}_{70}$  complexes.  $Q_{\text{Host}}$  - charge on  $\text{Pt}_6\text{PBI}_3$  host, and  $Q_{\text{C}_{60}}/Q_{\text{C}_{70}}$  - charge on fullerene moiety. Total charge of the complexes  $Q_{\text{Tot}} = 0$ .

| Charge Scheme | $\text{Pt}_6\text{PBI}_3\supset\text{C}_{60}$ |                     | $\text{Pt}_6\text{PBI}_3\supset\text{C}_{70}$ |                     |
|---------------|-----------------------------------------------|---------------------|-----------------------------------------------|---------------------|
|               | $Q_{\text{Host}}$                             | $Q_{\text{C}_{60}}$ | $Q_{\text{Host}}$                             | $Q_{\text{C}_{70}}$ |
| Mulliken      | -0.013                                        | 0.013               | -0.024                                        | 0.024               |
| Lowdin        | 0.018                                         | -0.018              | 0.011                                         | -0.011              |
| Hirshfeld     | -0.073                                        | 0.072               | -0.100                                        | 0.100               |
| CM5           | -0.073                                        | 0.072               | -0.096                                        | 0.096               |

**Table S2.** Parameters (electron density [ $\rho(r)$ ], its Laplacian [ $\nabla^2\rho(r)$ ], potential energy density [ $V(r)$ ], kinetic energy density [ $G(r)$ ], and total electron energy density [ $H(r)$ ] for selected bond critical points related to non-covalent interactions in  $\text{Pt}_6\text{PBI}_3\supset\text{C}_{60}$  and  $\text{Pt}_6\text{PBI}_3\supset\text{C}_{70}$  complexes computed in the gas phase.

| Bond critical points between fragments         | Interaction | $\rho(r)$ , au                                                  | $\nabla^2\rho(r)$ , au | $V(r)$ , au | $G(r)$ , au | $H(r)$ , au |
|------------------------------------------------|-------------|-----------------------------------------------------------------|------------------------|-------------|-------------|-------------|
|                                                |             | <b><math>\text{Pt}_6\text{PBI}_3\supset\text{C}_{60}</math></b> |                        |             |             |             |
| $\text{Pt}_6\text{PBI}_3 \cdots \text{C}_{60}$ | C...C       | 5.81E-03                                                        | 1.55E-02               | -2.47E-03   | 3.17E-03    | 6.95E-04    |
|                                                |             | 1.15E-02                                                        | 3.61E-02               | -5.61E-03   | 7.32E-03    | 1.71E-03    |
|                                                |             | 7.26E-03                                                        | 2.00E-02               | -2.99E-03   | 3.99E-03    | 1.00E-03    |
|                                                |             | 9.11E-03                                                        | 2.70E-02               | -3.92E-03   | 5.33E-03    | 1.41E-03    |
|                                                |             | 9.48E-03                                                        | 2.83E-02               | -4.23E-03   | 5.65E-03    | 1.42E-03    |
|                                                |             | 7.51E-03                                                        | 2.33E-02               | -3.39E-03   | 4.60E-03    | 1.21E-03    |
|                                                |             | 7.24E-03                                                        | 2.13E-02               | -3.17E-03   | 4.25E-03    | 1.08E-03    |
|                                                |             | 8.35E-03                                                        | 2.32E-02               | -3.54E-03   | 4.68E-03    | 1.13E-03    |
|                                                |             | 8.49E-03                                                        | 2.55E-02               | -3.71E-03   | 5.05E-03    | 1.33E-03    |
|                                                |             | 6.49E-03                                                        | 1.68E-02               | -2.64E-03   | 3.42E-03    | 7.84E-04    |
|                                                |             | <b><math>\text{Pt}_6\text{PBI}_3\supset\text{C}_{70}</math></b> |                        |             |             |             |
| $\text{Pt}_6\text{PBI}_3 \cdots \text{C}_{60}$ | C...C       | 5.75E-03                                                        | 1.57E-02               | -2.40E-03   | 3.16E-03    | 7.59E-04    |
|                                                |             | 7.19E-03                                                        | 2.14E-02               | -3.16E-03   | 4.25E-03    | 1.09E-03    |
|                                                |             | 8.77E-03                                                        | 2.61E-02               | -3.91E-03   | 5.22E-03    | 1.31E-03    |
|                                                |             | 9.86E-03                                                        | 3.12E-02               | -4.57E-03   | 6.18E-03    | 1.61E-03    |
|                                                |             | 9.37E-03                                                        | 2.71E-02               | -4.10E-03   | 5.43E-03    | 1.34E-03    |
|                                                |             | 8.61E-03                                                        | 2.66E-02               | -3.95E-03   | 5.30E-03    | 1.35E-03    |
|                                                |             | 3.93E-03                                                        | 1.02E-02               | -1.69E-03   | 2.12E-03    | 4.32E-04    |
|                                                |             | 3.05E-03                                                        | 8.97E-03               | -1.46E-03   | 1.85E-03    | 3.91E-04    |
|                                                |             | 9.53E-03                                                        | 2.87E-02               | -4.23E-03   | 5.70E-03    | 1.48E-03    |
|                                                |             | 8.43E-03                                                        | 2.61E-02               | -3.86E-03   | 5.19E-03    | 1.33E-03    |
|                                                |             | 8.91E-03                                                        | 2.69E-02               | -4.08E-03   | 5.40E-03    | 1.33E-03    |

|  |  |          |          |           |          |          |
|--|--|----------|----------|-----------|----------|----------|
|  |  | 6.01E-03 | 1.67E-02 | -2.52E-03 | 3.34E-03 | 8.22E-04 |
|  |  | 1.02E-02 | 3.26E-02 | -4.66E-03 | 6.40E-03 | 1.74E-03 |
|  |  | 8.82E-03 | 2.52E-02 | -3.76E-03 | 5.03E-03 | 1.27E-03 |
|  |  | 5.53E-03 | 1.43E-02 | -2.32E-03 | 2.95E-03 | 6.25E-04 |

**Table S3.** Excitation energies ( $E_x$ , eV) and dipole moments in the ground state ( $\mu_0$  in D), change in dipole moments between the ground state and the excited state of interest ( $\Delta\mu = \mu_i - \mu_0$ , D), as well as solvation energies ( $E_{solv}$ , eV) in acetonitrile calculated for  $\text{Pt}_6\text{PBI}_3\supset\text{C}_{60}$  and  $\text{Pt}_6\text{PBI}_3\supset\text{C}_{70}$  complexes.

|             | Supramolecular host-guest system                                         |                                               |
|-------------|--------------------------------------------------------------------------|-----------------------------------------------|
|             | $\text{Pt}_6\text{PBI}_3\supset\text{C}_{60}$                            | $\text{Pt}_6\text{PBI}_3\supset\text{C}_{70}$ |
|             | Ground state (GS)                                                        |                                               |
| $E_x$       | 0.000                                                                    | 0.000                                         |
| $\mu_0$     | 0.87                                                                     | 2.11                                          |
| $E_{solv}$  | -5.291                                                                   | -5.280                                        |
|             | $\text{LE}^{\text{Guest}} (\text{C}_{60}/\text{C}_{70})$                 |                                               |
| $E_x$       | 2.499                                                                    | 2.284                                         |
| $\Delta\mu$ | 0.41                                                                     | 0.06                                          |
| $E_{solv}$  | -5.292                                                                   | -5.285                                        |
|             | $\text{LE}^{\text{Host}} ([\text{Pt}_6\text{PBI}_3])$                    |                                               |
| $E_x$       | 2.692                                                                    | 2.678                                         |
| $\Delta\mu$ | 0.26                                                                     | 1.11                                          |
| $E_{solv}$  | -5.326                                                                   | -5.313                                        |
|             | Most absorptive ( $\text{Pt}_6\text{PBI}_3$ )                            |                                               |
| $E_x$       | 2.741                                                                    | 2.739                                         |
| $\mu_0$     | 0.42                                                                     | 2.06                                          |
| $E_{solv}$  | -5.342                                                                   | -5.330                                        |
|             | CT ( $\text{C}_{60}/\text{C}_{70} \rightarrow \text{Pt}_6\text{PBI}_3$ ) |                                               |
| $E_x$       | 2.678                                                                    | 2.295                                         |
| $\Delta\mu$ | 11.84                                                                    | 14.47                                         |
| $E_{solv}$  | -5.595                                                                   | -5.617                                        |

**Table S4.** Computed semi-classical rates ( $k_x$  in  $\text{s}^{-1}$ ) and characteristic times ( $\tau$  in ns) for the CS process in  $\text{Pt}_6\text{PBI}_3\supset\text{C}_{70}$  complex in acetonitrile using different effective Huang-Rhys ( $S_{eff}$ ) factors.

| $\hbar\omega_{eff}$ | $\Delta G^0$ , eV                                | $ V $ , eV           | $\lambda_s$ | $\lambda_i$ | $S_{eff}$ | $k_x$ , $\text{s}^{-1}$ | $\tau$ , ns |
|---------------------|--------------------------------------------------|----------------------|-------------|-------------|-----------|-------------------------|-------------|
|                     | $\text{LE}^{\text{Guest}} \rightarrow \text{CT}$ |                      |             |             |           |                         |             |
| 1400                | 0.021                                            | $2.42 \cdot 10^{-3}$ | 0.461       | 0.222       | 1.279     | $3.05 \cdot 10^8$       | 3.28        |
| 1600                |                                                  |                      |             |             | 1.119     | $3.54 \cdot 10^8$       | 2.82        |
| 1800                |                                                  |                      |             |             | 0.995     | $3.99 \cdot 10^8$       | 2.51        |

**Table S5.** EDA results (in kcal/mol) for  $\text{Pt}_6\text{PBI}_3\supset\text{Sc}_3\text{N@C}_{80}$ ,  $\text{Pt}_6\text{PBI}_3\supset\text{Sc}_3\text{CH@C}_{80}$ , and  $\text{Pt}_6\text{PBI}_3\supset\text{Sc}_4\text{O}_3\text{@C}_{80}$  complexes.

| $\text{Pt}_6\text{PBI}_3\supset\text{C}_{xx}$ | Energy terms              |                            |                        |                          | $\Delta E_{\text{int}}$ | $\Delta E_{\text{def}}$ | $\Delta E_{\text{complex}}$ |
|-----------------------------------------------|---------------------------|----------------------------|------------------------|--------------------------|-------------------------|-------------------------|-----------------------------|
|                                               | $\Delta E_{\text{Pauli}}$ | $\Delta E_{\text{elstat}}$ | $\Delta E_{\text{oi}}$ | $\Delta E_{\text{disp}}$ |                         |                         |                             |
| $\text{Sc}_3\text{N@C}_{80}$                  | 115.98                    | -48.25 (25%)               | -24.50 (12%)           | -123.62 (63%)            | -80.39                  | 14.58                   | -65.81                      |
| $\text{Sc}_3\text{CH@C}_{80}$                 | 115.99                    | -46.07 (24%)               | -25.22 (13%)           | -123.67 (63%)            | -78.98                  | 15.05                   | -63.93                      |
| $\text{Sc}_4\text{O}_3\text{@C}_{80}$         | 114.30                    | -47.47 (24%)               | -24.19 (12%)           | -123.70 (63%)            | -81.06                  | 13.24                   | -67.82                      |

<sup>[a]</sup> The percentage contributions to the sum of all attractive energy terms ( $\Delta E_{\text{elstat}} + \Delta E_{\text{oi}} + \Delta E_{\text{disp}}$ ) are listed in parentheses.

**Table S6.** Excitation energies ( $E_x$ , eV) and dipole moments in the ground state ( $\mu_0$ , D), change in dipole moments between the GS and excited state of interest ( $\Delta\mu = \mu_i - \mu_0$ , D), as well as solvation energies ( $E_{\text{solv}}$ , eV) in acetonitrile calculated for  $\text{Pt}_6\text{PBI}_3\supset\text{Sc}_3\text{N@C}_{80}$ ,  $\text{Pt}_6\text{PBI}_3\supset\text{Sc}_3\text{CH@C}_{80}$ , and  $\text{Pt}_6\text{PBI}_3\supset\text{Sc}_4\text{O}_3\text{@C}_{80}$  complexes.

|                   | Supramolecular system $\text{Pt}_6\text{PBI}_3\supset\text{C}_{xxx}$ |                                                             |                                                                     |
|-------------------|----------------------------------------------------------------------|-------------------------------------------------------------|---------------------------------------------------------------------|
|                   | $\text{Pt}_6\text{PBI}_3\supset\text{Sc}_3\text{N@C}_{80}$           | $\text{Pt}_6\text{PBI}_3\supset\text{Sc}_3\text{CH@C}_{80}$ | $\text{Pt}_6\text{PBI}_3\supset\text{Sc}_4\text{O}_3\text{@C}_{80}$ |
|                   | Ground state (GS)                                                    |                                                             |                                                                     |
| $E_x$             | 0.000                                                                | 0.000                                                       | 0.000                                                               |
| $\mu_0$           | 2.77                                                                 | 1.46                                                        | 1.16                                                                |
| $E_{\text{solv}}$ | -4.834                                                               | -5.182                                                      | -5.313                                                              |
|                   | $\text{LE}^{\text{Guest}}(\text{C}_{xxx})$                           |                                                             |                                                                     |
| $E_x$             | 2.111                                                                | 2.117                                                       | 2.229                                                               |
| $\Delta\mu$       | 2.80                                                                 | 2.60                                                        | 3.02                                                                |
| $E_{\text{solv}}$ | -4.839                                                               | -5.220                                                      | -5.319                                                              |
|                   | $\text{LE}^{\text{Host}}([\text{Pt}_6\text{PBI}_3])$                 |                                                             |                                                                     |
| $E_x$             | 2.803                                                                | 2.703                                                       | 2.719                                                               |
| $\Delta\mu$       | 1.40                                                                 | 1.03                                                        | 3.46                                                                |
| $E_{\text{solv}}$ | -4.843                                                               | -5.226                                                      | -5.350                                                              |
|                   | CT ( $\text{C}_{xxx} \rightarrow \text{Pt}_6\text{PBI}_3$ )          |                                                             |                                                                     |
| $E_x$             | 1.920                                                                | 1.577                                                       | 1.807                                                               |
| $\Delta\mu$       | 10.14                                                                | 21.06                                                       | 21.00                                                               |
| $E_{\text{solv}}$ | -5.174                                                               | -5.757                                                      | -5.853                                                              |

**Table S7.** Charge delocalization over the fragment index (IPR) in the CT state for  $\text{Pt}_6\text{PBI}_3\supset\text{Sc}_3\text{N@C}_{80}$ ,  $\text{Pt}_6\text{PBI}_3\supset\text{Sc}_3\text{CH@C}_{80}$ , and  $\text{Pt}_6\text{PBI}_3\supset\text{Sc}_4\text{O}_3\text{@C}_{80}$  complexes.

|     | $\text{Pt}_6\text{PBI}_3\supset\text{Sc}_3\text{N@C}_{80}$ |                           | $\text{Pt}_6\text{PBI}_3\supset\text{Sc}_3\text{CH@C}_{80}$ |                           | $\text{Pt}_6\text{PBI}_3\supset\text{Sc}_4\text{O}_3\text{@C}_{80}$ |                           |
|-----|------------------------------------------------------------|---------------------------|-------------------------------------------------------------|---------------------------|---------------------------------------------------------------------|---------------------------|
|     | $\text{Sc}_3\text{N@C}_{80}$                               | $\text{Pt}_6\text{PBI}_3$ | $\text{Sc}_3\text{CH@C}_{80}$                               | $\text{Pt}_6\text{PBI}_3$ | $\text{Sc}_4\text{O}_3\text{@C}_{80}$                               | $\text{Pt}_6\text{PBI}_3$ |
| IPR | 30.36                                                      | 51.92                     | 20.00                                                       | 27.47                     | 24.82                                                               | 28.38                     |

## Cartesian coordinates

### Pt<sub>6</sub>PBI<sub>3</sub> metallacage

Gas-phase. BLYP-D3(BJ)/def2-SVP

| Atom | X          | Y         | Z          |
|------|------------|-----------|------------|
| 7    | 10.1791790 | 3.3858180 | 5.7966760  |
| 6    | 10.2492890 | 3.7461950 | 4.4863670  |
| 6    | 9.0105440  | 3.5281890 | 6.4817260  |
| 6    | 9.1381740  | 4.2590830 | 3.8108550  |
| 1    | 11.2180920 | 3.5837510 | 3.9836370  |
| 6    | 7.8632170  | 4.0374090 | 5.8674930  |
| 1    | 9.0127140  | 3.2324730 | 7.5453900  |
| 6    | 7.9044640  | 4.4087370 | 4.4957100  |
| 1    | 9.2303470  | 4.5325770 | 2.7522710  |
| 1    | 6.9331460  | 4.1463140 | 6.4394370  |
| 6    | 6.7304710  | 4.8961290 | 3.8562810  |
| 6    | 5.6388190  | 5.2976500 | 3.4554610  |
| 6    | 4.4283400  | 5.7360920 | 2.8492520  |
| 6    | 4.4034050  | 5.8027340 | 1.4263600  |
| 6    | 3.2640860  | 6.0905600 | 3.5816080  |
| 6    | 3.2698060  | 6.1965940 | 0.7080880  |
| 1    | 5.3234050  | 5.5164790 | 0.9068310  |
| 6    | 3.2729920  | 6.0070570 | 5.0694430  |
| 6    | 2.0917790  | 6.5188040 | 2.8806150  |
| 6    | 2.0879130  | 6.5706290 | 1.4359020  |
| 8    | 4.2455950  | 5.6277830 | 5.7235950  |
| 7    | 2.0894610  | 6.3865980 | 5.7348850  |
| 6    | 0.9224960  | 6.8906530 | 3.6186730  |
| 6    | 0.9011320  | 6.9930990 | 0.7434780  |
| 6    | 0.9000990  | 6.8238850 | 5.1088360  |
| 6    | 2.1194060  | 6.3004050 | 7.2070910  |
| 6    | -0.2354520 | 7.3261760 | 2.9205390  |
| 6    | -0.2155840 | 7.3689490 | 1.4963660  |
| 8    | -0.0904080 | 7.1236300 | 5.7764750  |
| 1    | 2.3125110  | 5.2564520 | 7.5181220  |
| 1    | 2.9416930  | 6.9267550 | 7.5998390  |
| 1    | 1.1459340  | 6.6459740 | 7.5862930  |
| 6    | -1.4459160 | 7.7212920 | 3.5560870  |
| 1    | -1.1332880 | 7.7071030 | 1.0048040  |
| 6    | -2.5506610 | 8.0769110 | 3.9645270  |
| 6    | 3.2562960  | 6.2243510 | -0.7706900 |
| 6    | 0.8834190  | 7.0081350 | -0.7354260 |
| 6    | -3.7808260 | 8.4279530 | 4.5870600  |
| 6    | 4.3798310  | 5.8686880 | -1.5232820 |
| 6    | 2.0580030  | 6.6121080 | -1.4634910 |
| 6    | -0.2553530 | 7.3862630 | -1.4537960 |
| 6    | -4.8282760 | 9.0705780 | 3.8762520  |
| 6    | -3.9962770 | 8.1351020 | 5.9618930  |
| 6    | 4.3791830  | 5.8494220 | -2.9481090 |
| 1    | 5.3135310  | 5.5788930 | -1.0309740 |
| 6    | 2.0334570  | 6.6023620 | -2.9089210 |
| 1    | -1.1667880 | 7.6980670 | -0.9338800 |

### Pt<sub>6</sub>PBI<sub>3</sub>⊃C<sub>60</sub>

Gas-phase. BLYP-D3(BJ)/def2-SVP

| Atom | X          | Y         | Z          |
|------|------------|-----------|------------|
| 7    | 10.0932210 | 3.4149440 | 5.8745120  |
| 6    | 10.1856060 | 3.7446590 | 4.5576070  |
| 6    | 8.8874980  | 3.4558030 | 6.5072920  |
| 6    | 9.0582240  | 4.1112020 | 3.8176530  |
| 1    | 11.1906550 | 3.6811970 | 4.1056830  |
| 6    | 7.7206790  | 3.8125970 | 5.8267050  |
| 1    | 8.8828790  | 3.2038900 | 7.5820080  |
| 6    | 7.7859290  | 4.1399520 | 4.4444070  |
| 1    | 9.1684730  | 4.3638800 | 2.7556520  |
| 1    | 6.7568940  | 3.8338730 | 6.3509920  |
| 6    | 6.5968070  | 4.4844510 | 3.7443520  |
| 6    | 5.4853160  | 4.7688270 | 3.3014480  |
| 6    | 4.2636650  | 5.1584770 | 2.6886970  |
| 6    | 4.2719350  | 5.3646640 | 1.2811940  |
| 6    | 3.0533690  | 5.3407690 | 3.4098260  |
| 6    | 3.1282150  | 5.7455690 | 0.5715580  |
| 1    | 5.2165160  | 5.1756230 | 0.7618530  |
| 6    | 2.9810020  | 4.9629900 | 4.8483430  |
| 6    | 1.9008230  | 5.8502400 | 2.7331910  |
| 6    | 1.9324660  | 6.0527460 | 1.3050130  |
| 8    | 3.9142520  | 4.4478080 | 5.4659450  |
| 7    | 1.7527930  | 5.1901300 | 5.5019940  |
| 6    | 0.7106750  | 6.1310060 | 3.4746110  |
| 6    | 0.7541570  | 6.5184160 | 0.6296920  |
| 6    | 0.6136170  | 5.7965480 | 4.9234440  |
| 6    | 1.6843240  | 4.7681080 | 6.9133000  |
| 6    | -0.4058070 | 6.7030930 | 2.8086280  |
| 6    | -0.3612130 | 6.8707570 | 1.3957360  |
| 8    | -0.4013920 | 5.9966800 | 5.5910820  |
| 1    | 1.8795240  | 3.6816070 | 6.9846180  |
| 1    | 2.4620040  | 5.2909930 | 7.5004590  |
| 1    | 0.6799190  | 5.0127050 | 7.2902120  |
| 6    | -1.5873720 | 7.1338640 | 3.4716750  |
| 1    | -1.2613450 | 7.2730260 | 0.9206470  |
| 6    | -2.6309230 | 7.6018850 | 3.9244110  |
| 6    | 3.1041050  | 5.7830030 | -0.9042860 |
| 6    | 0.7350360  | 6.5729640 | -0.8459940 |
| 6    | -3.7839340 | 8.0945440 | 4.5951760  |
| 6    | 4.2141650  | 5.4074660 | -1.6654920 |
| 6    | 1.8968940  | 6.1618120 | -1.5842590 |
| 6    | -0.4041970 | 6.9683690 | -1.5523640 |
| 6    | -4.7914260 | 8.8303160 | 3.9174470  |
| 6    | -3.9564880 | 7.8605270 | 5.9870010  |
| 6    | 4.1899960  | 5.3597870 | -3.0891870 |
| 1    | 5.1530890  | 5.1210860 | -1.1815590 |
| 6    | 1.8449430  | 6.1114660 | -3.0266960 |
| 1    | -1.3028040 | 7.3017120 | -1.0236650 |

|    |            |            |            |    |            |            |            |
|----|------------|------------|------------|----|------------|------------|------------|
| 6  | -0.3053050 | 7.3792780  | -2.8776630 | 6  | -0.4708490 | 6.9507460  | -2.9752360 |
| 6  | -6.0266760 | 9.3685530  | 4.5290090  | 6  | -5.9225260 | 9.2588460  | 4.6155500  |
| 1  | -4.7061920 | 9.3376580  | 2.8190830  | 1  | -4.6946990 | 9.0585630  | 2.8486100  |
| 6  | -5.2235330 | 8.4520880  | 6.5508630  | 6  | -5.1151460 | 8.3141190  | 6.6230920  |
| 1  | -3.2040180 | 7.6580500  | 6.5524250  | 1  | -3.1903190 | 7.3138490  | 6.5510370  |
| 6  | 3.1963400  | 6.2104220  | -3.6468680 | 6  | 2.9904690  | 5.6890520  | -3.7742420 |
| 6  | 5.5898230  | 5.4515710  | -3.5822780 | 6  | 5.4038720  | 4.9946610  | -3.7356320 |
| 6  | 0.8442490  | 6.9801140  | -3.6106850 | 6  | 0.6509700  | 6.4938190  | -3.7171160 |
| 6  | -1.5314340 | 7.7717910  | -3.4836400 | 6  | -1.6775890 | 7.4095200  | -3.5716550 |
| 7  | -6.2180380 | 9.0488570  | 5.8371400  | 7  | -6.0843980 | 8.9815490  | 5.9376320  |
| 1  | -6.8529720 | 9.9047890  | 4.0368850  | 1  | -6.7267850 | 9.8486780  | 4.1460180  |
| 1  | -5.4448500 | 8.2524320  | 7.6138160  | 1  | -5.3070040 | 8.1563910  | 7.6986640  |
| 6  | 3.1838780  | 6.1716760  | -5.1379510 | 6  | 2.9452100  | 5.5945180  | -5.2619520 |
| 6  | 6.6935080  | 5.0846060  | -3.9837640 | 6  | 6.5284670  | 4.7057410  | -4.1422900 |
| 6  | 0.7989680  | 6.9534510  | -5.1000190 | 6  | 0.5751390  | 6.4196150  | -5.2033500 |
| 6  | -2.6407900 | 8.1205190  | -3.8853590 | 6  | -2.7532620 | 7.8575990  | -3.9658380 |
| 8  | 4.1592260  | 5.8251010  | -5.8052360 | 8  | 3.9010270  | 5.2081430  | -5.9354610 |
| 7  | 1.9764550  | 6.5544320  | -5.7651260 | 7  | 1.7293290  | 5.9697830  | -5.8771750 |
| 6  | 7.9021560  | 4.6444950  | -4.5921430 | 6  | 7.7743550  | 4.3706500  | -4.7413420 |
| 8  | -0.1994510 | 7.2543970  | -5.7560720 | 8  | -0.4295350 | 6.7208250  | -5.8496110 |
| 6  | -3.8610510 | 8.4713970  | -4.5279220 | 6  | -3.9360950 | 8.3281750  | -4.6005720 |
| 6  | 1.9116670  | 6.5344970  | -7.2385980 | 6  | 1.6314700  | 5.8933140  | -7.3469190 |
| 6  | 9.1186530  | 4.5490530  | -3.8664510 | 6  | 8.9840400  | 4.3682680  | -3.9979400 |
| 6  | 7.9223530  | 4.2793280  | -5.9661550 | 6  | 7.8446240  | 4.0272270  | -6.1190710 |
| 6  | -4.9685600 | 9.0032120  | -3.8171790 | 6  | -5.0020780 | 8.9211460  | -3.8749330 |
| 6  | -4.0015690 | 8.2887050  | -5.9312670 | 6  | -4.0797680 | 8.2084800  | -6.0102850 |
| 1  | 1.1236530  | 5.8322730  | -7.5696600 | 1  | 0.8186070  | 5.1995080  | -7.6323690 |
| 1  | 1.6461790  | 7.5404090  | -7.6135000 | 1  | 1.3833390  | 6.8901320  | -7.7564940 |
| 1  | 2.8966760  | 6.2217010  | -7.6165000 | 1  | 2.5998270  | 5.5405100  | -7.7325470 |
| 6  | 10.2735500 | 4.0898040  | -4.5053190 | 6  | 10.1807530 | 4.0072220  | -4.6218730 |
| 1  | 9.1623400  | 4.8312800  | -2.8070270 | 1  | 8.9883880  | 4.6418020  | -2.9353840 |
| 6  | 9.1110390  | 3.8227490  | -6.5419470 | 6  | 9.0742790  | 3.6711710  | -6.6797190 |
| 1  | 7.0081430  | 4.3550520  | -6.5682580 | 1  | 6.9365750  | 4.0352410  | -6.7350310 |
| 6  | -6.1479500 | 9.3094190  | -4.5009610 | 6  | -6.1541770 | 9.3318690  | -4.5499120 |
| 1  | -4.9085020 | 9.1786760  | -2.7357030 | 1  | -4.9342640 | 9.0543580  | -2.7879080 |
| 6  | -5.2129280 | 8.6079330  | -6.5514940 | 6  | -5.2619270 | 8.6350680  | -6.6215270 |
| 1  | -3.1632130 | 7.8942300  | -6.5192420 | 1  | -3.2701890 | 7.7714730  | -6.6084340 |
| 7  | 10.2595160 | 3.7278190  | -5.8170970 | 7  | 10.2141390 | 3.6532900  | -5.9355620 |
| 1  | 9.1928820  | 3.5487000  | -7.6070020 | 1  | 9.1920280  | 3.4057450  | -7.7440620 |
| 7  | -6.2633690 | 9.1047390  | -5.8408460 | 7  | -6.2806500 | 9.1736740  | -5.8952490 |
| 1  | -7.0243710 | 9.7586820  | -4.0042280 | 1  | -7.0058980 | 9.8128590  | -4.0390330 |
| 1  | -5.3772040 | 8.4832840  | -7.6361010 | 1  | -5.4330790 | 8.5568700  | -7.7093450 |
| 78 | -8.2210380 | 9.1824000  | -6.7535720 | 78 | -8.2555170 | 9.2716230  | -6.7719530 |
| 78 | -8.2166880 | 9.0925060  | 6.6411520  | 78 | -8.0787250 | 9.0540450  | 6.7639600  |
| 7  | 10.7863370 | 0.6444080  | 5.8122950  | 7  | 10.7061590 | 0.7139740  | 5.9332010  |
| 6  | 9.7924590  | 0.0391390  | 6.5200570  | 6  | 9.6551980  | 0.1756110  | 6.6117330  |
| 6  | 10.9360950 | 0.3855710  | 4.4857750  | 6  | 10.8755450 | 0.4508700  | 4.6093160  |
| 6  | 8.8953390  | -0.8411110 | 5.9086770  | 6  | 8.7095890  | -0.6275790 | 5.9684530  |
| 1  | 9.7529100  | 0.2784320  | 7.5968420  | 1  | 9.6050660  | 0.4119180  | 7.6888910  |
| 6  | 10.0692830 | -0.4764010 | 3.8099800  | 6  | 9.9633810  | -0.3363560 | 3.9031900  |
| 1  | 11.7869350 | 0.8676600  | 3.9877860  | 1  | 11.7804100 | 0.8740220  | 4.1454640  |
| 6  | 9.0106650  | -1.1050780 | 4.5159180  | 6  | 8.8393990  | -0.8834490 | 4.5756570  |
| 1  | 8.1023590  | -1.3217790 | 6.4952950  | 1  | 7.8663230  | -1.0516380 | 6.5280440  |



|   |            |             |            |   |            |             |            |
|---|------------|-------------|------------|---|------------|-------------|------------|
| 1 | 10.2154740 | -0.6596570  | 2.7382020  | 1 | 10.1224770 | -0.5235800  | 2.8338730  |
| 6 | 8.0829970  | -1.9692200  | 3.8702520  | 6 | 7.8682840  | -1.6743370  | 3.9020130  |
| 6 | 7.2207180  | -2.7335490  | 3.4392150  | 6 | 6.9724500  | -2.3909500  | 3.4583470  |
| 6 | 6.2713880  | -3.5692640  | 2.7869380  | 6 | 6.0339960  | -3.2366390  | 2.8067560  |
| 6 | 6.2711920  | -3.5562410  | 1.3621740  | 6 | 6.1055910  | -3.3098600  | 1.3865710  |
| 6 | 5.3399460  | -4.3928050  | 3.4731040  | 6 | 5.0531290  | -3.9999990  | 3.4923900  |
| 6 | 5.3853900  | -4.3237760  | 0.5993350  | 6 | 5.2558950  | -4.1211110  | 0.6302220  |
| 1 | 7.0033350  | -2.9018250  | 0.8786070  | 1 | 6.8499340  | -2.6722010  | 0.9002390  |
| 6 | 5.3175690  | -4.3974170  | 4.9627450  | 6 | 4.8836420  | -3.8329380  | 4.9620950  |
| 6 | 4.4310720  | -5.2076530  | 2.7252490  | 6 | 4.2123710  | -4.8916630  | 2.7562550  |
| 6 | 4.4509630  | -5.1784650  | 1.2798530  | 6 | 4.3154520  | -4.9623300  | 1.3167190  |
| 8 | 6.0669550  | -3.7081040  | 5.6561500  | 8 | 5.5503290  | -3.0488330  | 5.6391870  |
| 7 | 4.3755860  | -5.2442270  | 5.5818420  | 7 | 3.8850110  | -4.6134480  | 5.5786330  |
| 6 | 3.5011390  | -6.0484300  | 3.4171990  | 6 | 3.2420360  | -5.6822120  | 3.4494020  |
| 6 | 3.5355560  | -6.0033800  | 0.5396640  | 6 | 3.4254720  | -5.8184340  | 0.5826560  |
| 6 | 3.4514790  | -6.0749910  | 4.9085370  | 6 | 3.0580370  | -5.5540950  | 4.9236670  |
| 6 | 4.3693410  | -5.2348030  | 7.0568000  | 6 | 3.7143270  | -4.4152200  | 7.0299300  |
| 6 | 2.6095530  | -6.8656770  | 2.6708900  | 6 | 2.4170270  | -6.5748430  | 2.7145540  |
| 6 | 2.6530530  | -6.8256630  | 1.2472010  | 6 | 2.5234420  | -6.6132590  | 1.2945260  |
| 8 | 2.6561060  | -6.7722980  | 5.5395290  | 8 | 2.2256210  | -6.2067770  | 5.5544860  |
| 1 | 5.3685220  | -5.5198820  | 7.4353050  | 1 | 4.6596980  | -4.6490030  | 7.5541830  |
| 1 | 4.1479000  | -4.2151840  | 7.4242960  | 1 | 3.4678170  | -3.3564200  | 7.2334510  |
| 1 | 3.6025650  | -5.9469980  | 7.3967910  | 1 | 2.9051530  | -5.0790500  | 7.3695170  |
| 6 | 1.6473690  | -7.7314770  | 3.2618430  | 6 | 1.4677830  | -7.4469930  | 3.3134110  |
| 1 | 1.9451630  | -7.4722060  | 0.7188150  | 1 | 1.8390310  | -7.2883850  | 0.7715660  |
| 6 | 0.7690770  | -8.4992640  | 3.6527920  | 6 | 0.6432240  | -8.2670260  | 3.7145570  |
| 6 | 5.3829680  | -4.2688790  | -0.8788040 | 6 | 5.2552730  | -4.0784620  | -0.8455880 |
| 6 | 3.5396930  | -5.9555960  | -0.9388640 | 6 | 3.4300070  | -5.7810160  | -0.8942290 |
| 6 | -0.2154350 | -9.3054500  | 4.2898040  | 6 | -0.2752390 | -9.1355590  | 4.3665520  |
| 6 | 6.2605310  | -3.4412200  | -1.5860430 | 6 | 6.1101660  | -3.2310630  | -1.5553750 |
| 6 | 4.4524250  | -5.0770810  | -1.6184370 | 6 | 4.3174920  | -4.8822490  | -1.5780360 |
| 6 | 2.6669500  | -6.7371040  | -1.7028050 | 6 | 2.5491790  | -6.5587900  | -1.6514590 |
| 6 | -0.9991620 | -10.2529160 | 3.5809830  | 6 | -1.0076980 | -10.1308520 | 3.6684360  |
| 6 | -0.4412500 | -9.1719770  | 5.6876840  | 6 | -0.4834820 | -9.0186720  | 5.7685490  |
| 6 | 6.2608910  | -3.3531800  | -3.0083270 | 6 | 6.0691150  | -3.1083320  | -2.9737780 |
| 1 | 6.9876460  | -2.8160780  | -1.0581180 | 1 | 6.8467820  | -2.6135190  | -1.0324800 |
| 6 | 4.4345130  | -5.0056560  | -3.0622660 | 6 | 4.2437740  | -4.7609350  | -3.0154570 |
| 1 | 1.9655140  | -7.4253290  | -1.2206200 | 1 | 1.8696990  | -7.2663460  | -1.1662860 |
| 6 | 2.6285800  | -6.6814290  | -3.1261590 | 6 | 2.4700030  | -6.4692650  | -3.0709670 |
| 6 | -1.9677590 | -10.9961340 | 4.2605420  | 6 | -1.9269680 | -10.9239540 | 4.3594360  |
| 1 | -0.8516830 | -10.4102570 | 2.5051490  | 1 | -0.8662510 | -10.2785830 | 2.5904340  |
| 6 | -1.4328370 | -9.9407390  | 6.3030400  | 6 | -1.4216570 | -9.8419980  | 6.3963130  |
| 1 | 0.1586400  | -8.4650880  | 6.2745750  | 1 | 0.0806390  | -8.2755530  | 6.3460820  |
| 6 | 5.3367950  | -4.1343390  | -3.7529690 | 6 | 5.1107130  | -3.8566180  | -3.7081290 |
| 6 | 7.2080880  | -2.4679110  | -3.5953730 | 6 | 7.0247260  | -2.2394580  | -3.5697090 |
| 6 | 3.5122710  | -5.8052990  | -3.8100350 | 6 | 3.3040250  | -5.5460820  | -3.7555140 |
| 6 | 1.6808010  | -7.5199720  | -3.7778630 | 6 | 1.5438270  | -7.3310400  | -3.7211420 |
| 7 | -2.1840810 | -10.8276560 | 5.5929540  | 7 | -2.1404560 | -10.7609180 | 5.6932360  |
| 1 | -2.5712480 | -11.7750470 | 3.7688300  | 1 | -2.5079570 | -11.7249730 | 3.8740080  |
| 1 | -1.6458340 | -9.8822090  | 7.3845030  | 1 | -1.6292040 | -9.7930290  | 7.4792100  |
| 6 | 5.3196840  | -4.0330080  | -5.2415420 | 6 | 5.0245250  | -3.6902630  | -5.1879710 |
| 6 | 8.0712090  | -1.6732380  | -3.9659800 | 6 | 7.9287210  | -1.4970300  | -3.9506750 |
| 6 | 3.4680520  | -5.7264600  | -5.2971470 | 6 | 3.1907660  | -5.4034530  | -5.2341240 |

|   |            |             |            |   |            |             |            |
|---|------------|-------------|------------|---|------------|-------------|------------|
| 6 | 0.8150890  | -8.2831000  | -4.2041160 | 6 | 0.7295010  | -8.1432650  | -4.1571170 |
| 8 | 6.0712120  | -3.2861580  | -5.8694360 | 8 | 5.7395310  | -2.9080630  | -5.8156060 |
| 7 | 4.3798350  | -4.8460620  | -5.9148000 | 7 | 4.0590700  | -4.4802040  | -5.8521750 |
| 6 | 9.0065800  | -0.7786880  | -4.5574150 | 6 | 8.9167240  | -0.6743400  | -4.5594400 |
| 8 | 2.6856940  | -6.3795420  | -5.9890800 | 8 | 2.3860620  | -6.0366280  | -5.9188950 |
| 6 | -0.1679330 | -9.1016010  | -4.8269030 | 6 | -0.1902710 | -9.0157610  | -4.8017050 |
| 6 | 4.3206690  | -4.7825300  | -7.3872330 | 6 | 3.9261090  | -4.3476390  | -7.3150870 |
| 6 | 10.0278130 | -0.1452850  | -3.8017170 | 6 | 9.9514070  | -0.0558520  | -3.8098750 |
| 6 | 8.9415360  | -0.4940880  | -5.9490880 | 6 | 8.8963520  | -0.4557550  | -5.9642020 |
| 6 | -0.5167570 | -8.9012530  | -6.1904250 | 6 | -0.4842160 | -8.8582740  | -6.1837500 |
| 6 | -0.8387190 | -10.1351450 | -4.1225850 | 6 | -0.8497240 | -10.0601910 | -4.1032500 |
| 1 | 3.3143860  | -4.4535500  | -7.7078370 | 1 | 2.8984510  | -4.0270960  | -7.5693570 |
| 1 | 5.0899620  | -4.0727010  | -7.7265990 | 1 | 4.6631990  | -3.6051650  | -7.6560530 |
| 1 | 4.4974680  | -5.7885270  | -7.8110940 | 1 | 4.1026140  | -5.3275940  | -7.7963210 |
| 6 | 10.9154750 | 0.7300890   | -4.4324140 | 6 | 10.8892850 | 0.7512110   | -4.4584680 |
| 1 | 10.1318520 | -0.3401210  | -2.7269210 | 1 | 10.0228410 | -0.2045700  | -2.7250980 |
| 6 | 9.8558750  | 0.3989850   | -6.5153260 | 6 | 9.8623960  | 0.3679480   | -6.5488650 |
| 1 | 8.1752260  | -0.9722160  | -6.5721440 | 1 | 8.1210450  | -0.9266900  | -6.5816140 |
| 6 | -1.5037000 | -9.6984540  | -6.7777530 | 6 | -1.4192720 | -9.7003280  | -6.7922500 |
| 1 | -0.0154020 | -8.1228250  | -6.7792040 | 1 | 0.0137550  | -8.0732550  | -6.7666630 |
| 6 | -1.8128910 | -10.8986180 | -4.7709240 | 6 | -1.7730910 | -10.8672200 | -4.7724930 |
| 1 | -0.6049230 | -10.3410710 | -3.0705540 | 1 | -0.6525090 | -10.2356250 | -3.0382880 |
| 7 | 10.8210530 | 0.9968580   | -5.7629880 | 7 | 10.8328340 | 0.9632630   | -5.8011510 |
| 1 | 11.7524510 | 1.2130180   | -3.9001750 | 1 | 11.7283500 | 1.2328730   | -3.9278240 |
| 1 | 9.8485470  | 0.6559330   | -7.5891040 | 1 | 9.8904800  | 0.5750510   | -7.6329800 |
| 7 | -2.1389090 | -10.6758670 | -6.0734170 | 7 | -2.0568850 | -10.6780820 | -6.0900410 |
| 1 | -1.7939920 | -9.5777350  | -7.8361500 | 1 | -1.6740550 | -9.6114140  | -7.8627920 |
| 1 | -2.3639880 | -11.7030310 | -4.2529980 | 1 | -2.3248710 | -11.6730770 | -4.2572510 |
| 7 | -8.2600420 | 7.1381290   | 5.7152850  | 7 | -8.1018030 | 7.1024260   | 5.8248600  |
| 6 | -8.5636700 | 7.0531780   | 4.3912900  | 6 | -8.3864100 | 7.0367830   | 4.4956380  |
| 6 | -7.7797420 | 6.0485210   | 6.3764780  | 6 | -7.5389470 | 6.0347170   | 6.4564100  |
| 6 | -8.3843290 | 5.8651480   | 3.6767250  | 6 | -8.0950570 | 5.8956720   | 3.7433020  |
| 1 | -8.9445630 | 7.9727660   | 3.9137370  | 1 | -8.8325850 | 7.9388310   | 4.0412110  |
| 6 | -7.5820680 | 4.8289330   | 5.7233370  | 6 | -7.2195590 | 4.8643810   | 5.7634280  |
| 6 | -7.8759400 | 4.7166510   | 4.3366810  | 6 | -7.4847920 | 4.7783490   | 4.3691250  |
| 1 | -8.6360710 | 5.8353800   | 2.6091870  | 1 | -8.3317620 | 5.8810370   | 2.6720420  |
| 1 | -7.2007520 | 3.9611870   | 6.2761970  | 1 | -6.7572830 | 4.0184070   | 6.2875790  |
| 6 | -7.6525960 | 3.4820500   | 3.6648870  | 6 | -7.1421070 | 3.5964430   | 3.6563310  |
| 6 | -7.4115340 | 2.3490960   | 3.2503000  | 6 | -6.8015840 | 2.5074630   | 3.1972330  |
| 6 | -7.1587200 | 1.0870930   | 2.6436290  | 6 | -6.5120150 | 1.2678550   | 2.5656690  |
| 6 | -7.1864820 | 1.0323830   | 1.2202480  | 6 | -6.6916010 | 1.1917020   | 1.1563710  |
| 6 | -6.8789830 | -0.0958450  | 3.3790620  | 6 | -6.0574190 | 0.1201130   | 3.2698400  |
| 6 | -6.9465930 | -0.1449900  | 0.5044010  | 6 | -6.4583150 | 0.0182760   | 0.4320770  |
| 1 | -7.4000810 | 1.9708070   | 0.6986790  | 1 | -6.9911220 | 2.1137220   | 0.6480330  |
| 6 | -6.8213200 | -0.0456750  | 4.8676430  | 6 | -5.6856790 | 0.2277380   | 4.7077770  |
| 6 | -6.6531530 | -1.3246980  | 2.6803690  | 6 | -5.9322700 | -1.1243180  | 2.5781130  |
| 6 | -6.6870480 | -1.3554510  | 1.2353390  | 6 | -6.1455810 | -1.1842920  | 1.1525280  |
| 8 | -6.9921960 | 0.9844430   | 5.5214900  | 8 | -5.7289480 | 1.2800310   | 5.3466630  |
| 7 | -6.5489270 | -1.2574210  | 5.5348520  | 7 | -5.2229830 | -0.9492060  | 5.3321030  |
| 6 | -6.3922540 | -2.5221830  | 3.4209000  | 6 | -5.5594400 | -2.3019190  | 3.2992170  |
| 6 | -6.4607020 | -2.5963580  | 0.5460480  | 6 | -5.9730730 | -2.4316330  | 0.4629920  |
| 6 | -6.3276080 | -2.5061620  | 4.9110730  | 6 | -5.1671020 | -2.2286860  | 4.7344730  |
| 6 | -6.4937260 | -1.1867470  | 7.0072020  | 6 | -4.7831520 | -0.8077850  | 6.7321690  |

|   |            |             |            |   |            |             |            |
|---|------------|-------------|------------|---|------------|-------------|------------|
| 6 | -6.1899800 | -3.7443240  | 2.7257780  | 6 | -5.5229440 | -3.5504470  | 2.6233210  |
| 6 | -6.2325990 | -3.7507390  | 1.3015560  | 6 | -5.7266050 | -3.5838120  | 1.2146760  |
| 8 | -6.0910010 | -3.5125290  | 5.5803090  | 8 | -4.7782190 | -3.2075190  | 5.3726430  |
| 1 | -5.7163940 | -0.4639950  | 7.3178170  | 1 | -3.9594290 | -0.0715170  | 6.7882280  |
| 1 | -7.4634490 | -0.8290100  | 7.4010890  | 1 | -5.6172110 | -0.4314480  | 7.3530940  |
| 1 | -6.2661910 | -2.1945490  | 7.3859910  | 1 | -4.4500450 | -1.7961860  | 7.0827820  |
| 6 | -5.9344470 | -4.9906030  | 3.3643550  | 6 | -5.2848510 | -4.7939630  | 3.2697740  |
| 1 | -6.0668350 | -4.7156700  | 0.8121090  | 1 | -5.6390880 | -4.5607300  | 0.7292970  |
| 6 | -5.7048040 | -6.1281120  | 3.7734320  | 6 | -5.1559930 | -5.9356270  | 3.7093000  |
| 6 | -6.9440940 | -0.1701610  | -0.9746150 | 6 | -6.4592610 | -0.0010990  | -1.0442890 |
| 6 | -6.4638690 | -2.6225600  | -0.9327790 | 6 | -5.9720850 | -2.4512310  | -1.0130570 |
| 6 | -5.4156710 | -7.3735750  | 4.3979970  | 6 | -5.0015200 | -7.1884930  | 4.3643120  |
| 6 | -7.1730600 | 0.9838680   | -1.7305160 | 6 | -6.6828530 | 1.1570610   | -1.7941800 |
| 6 | -6.6891480 | -1.4054670  | -1.6638850 | 6 | -6.1683480 | -1.2255670  | -1.7369120 |
| 6 | -6.2387880 | -3.8028660  | -1.6482070 | 6 | -5.7207480 | -3.6229410  | -1.7318460 |
| 6 | -5.5034400 | -8.6065280  | 3.7002960  | 6 | -5.1823880 | -8.4208600  | 3.6840020  |
| 6 | -5.0167070 | -7.4157290  | 5.7618400  | 6 | -4.6655160 | -7.2395980  | 5.7446020  |
| 6 | -7.1425960 | 0.9913150   | -3.1552000 | 6 | -6.6039120 | 1.1799940   | -3.2165510 |
| 1 | -7.3782100 | 1.9412230   | -1.2410550 | 1 | -6.9204690 | 2.1047730   | -1.3008970 |
| 6 | -6.6590790 | -1.4241810  | -3.1091430 | 6 | -6.0610260 | -1.2222750  | -3.1773430 |
| 1 | -6.0715690 | -4.7504600  | -1.1263810 | 1 | -5.5761080 | -4.5767060  | -1.2149010 |
| 6 | -6.2041810 | -3.8459080  | -3.0719460 | 6 | -5.6256230 | -3.6471410  | -3.1533070 |
| 6 | -5.1874120 | -9.7995460  | 4.3561440  | 6 | -5.0101330 | -9.6247210  | 4.3722290  |
| 1 | -5.8132150 | -8.6354840  | 2.6481380  | 1 | -5.4501010 | -8.4410950  | 2.6201910  |
| 6 | -4.7092860 | -8.6428420  | 6.3561980  | 6 | -4.5092750 | -8.4781020  | 6.3727340  |
| 1 | -4.9480290 | -6.4887410  | 6.3448210  | 1 | -4.5247590 | -6.3109910  | 6.3119560  |
| 6 | -6.8769170 | -0.2185030  | -3.8501070 | 6 | -6.2603280 | -0.0100160  | -3.9117370 |
| 6 | -7.3820270 | 2.2413520   | -3.7930840 | 6 | -6.9016190 | 2.4173260   | -3.8531180 |
| 6 | -6.4078600 | -2.6480980  | -3.8077940 | 6 | -5.7688550 | -2.4349520  | -3.8789960 |
| 6 | -5.9536330 | -5.1103270  | -3.6742280 | 6 | -5.4072210 | -4.9134680  | -3.7629850 |
| 7 | -4.7930310 | -9.8095210  | 5.6587610  | 7 | -4.6738790 | -9.6455910  | 5.6908150  |
| 1 | -5.2306850 | -10.7782160 | 3.8460870  | 1 | -5.1198910 | -10.6047790 | 3.8749070  |
| 1 | -4.4040310 | -8.7150690  | 7.4147050  | 1 | -4.2572710 | -8.5593180  | 7.4444640  |
| 6 | -6.8277630 | -0.2126170  | -5.3408590 | 6 | -6.1193850 | 0.0210770   | -5.3962060 |
| 6 | -7.6026800 | 3.3826920   | -4.1962710 | 6 | -7.2282680 | 3.5327680   | -4.2565000 |
| 6 | -6.3549040 | -2.6771990  | -5.2968840 | 6 | -5.6235110 | -2.4395620  | -5.3618380 |
| 6 | -5.7294490 | -6.2531520  | -4.0708180 | 6 | -5.2608280 | -6.0682790  | -4.1609560 |
| 8 | -6.9927410 | 0.8078370   | -6.0102960 | 8 | -6.2598610 | 1.0494420   | -6.0589700 |
| 7 | -6.5754990 | -1.4553240  | -5.9649990 | 7 | -5.8022920 | -1.2063450  | -6.0216970 |
| 6 | -7.8306710 | 4.6527650   | -4.7958730 | 6 | -7.5804890 | 4.7740930   | -4.8554070 |
| 8 | -6.1297580 | -3.6971420  | -5.9501690 | 8 | -5.3520520 | -3.4478570  | -6.0154930 |
| 6 | -5.4504840 | -7.4954760  | -4.7060050 | 6 | -5.0866040 | -7.3342740  | -4.7858680 |
| 6 | -6.5210230 | -1.5043200  | -7.4381050 | 6 | -5.6450750 | -1.2286590  | -7.4880540 |
| 6 | -8.4255820 | 5.7238750   | -4.0784010 | 6 | -8.2224150 | 5.8042170   | -4.1187530 |
| 6 | -7.4678270 | 4.8873560   | -6.1503810 | 6 | -7.3033840 | 5.0181600   | -6.2281980 |
| 6 | -5.4002050 | -8.7199100  | -3.9898020 | 6 | -5.1371060 | -8.5504130  | -4.0553100 |
| 6 | -5.2057020 | -7.5364660  | -6.1063960 | 6 | -4.8606510 | -7.4121370  | -6.1876490 |
| 1 | -5.5175440 | -1.8347560  | -7.7666940 | 1 | -4.6319780 | -1.5870380  | -7.7496320 |
| 1 | -7.2575930 | -2.2386610  | -7.8133070 | 1 | -6.3760000 | -1.9301750  | -7.9319160 |
| 1 | -6.7416530 | -0.4955320  | -7.8184190 | 1 | -5.8083940 | -0.2063610  | -7.8609980 |
| 6 | -8.6217790 | 6.9563500   | -4.7069570 | 6 | -8.5341610 | 7.0137330   | -4.7446840 |
| 1 | -8.7362580 | 5.5938260   | -3.0341350 | 1 | -8.4735220 | 5.6623520   | -3.0601200 |
| 6 | -7.6855720 | 6.1466170   | -6.7161160 | 6 | -7.6379500 | 6.2528110   | -6.7909570 |

|    |             |             |            |    |             |             |            |
|----|-------------|-------------|------------|----|-------------|-------------|------------|
| 1  | -7.0209000  | 4.0825850   | -6.7475140 | 1  | -6.8248490  | 4.2421850   | -6.8388670 |
| 6  | -5.0917770  | -9.9038020  | -4.6644870 | 6  | -4.9378080  | -9.7640020  | -4.7175990 |
| 1  | -5.6010270  | -8.7474880  | -2.9114710 | 1  | -5.3298970  | -8.5475200  | -2.9751750 |
| 6  | -4.8954640  | -8.7547180  | -6.7170070 | 6  | -4.6624190  | -8.6597240  | -6.7856580 |
| 1  | -5.2549650  | -6.6140920  | -6.6987600 | 1  | -4.8346420  | -6.4958800  | -6.7908820 |
| 7  | -8.2506510  | 7.1575590   | -6.0006660 | 7  | -8.2335280  | 7.2306070   | -6.0541580 |
| 1  | -9.0946730  | 7.8137010   | -4.1958500 | 1  | -9.0342120  | 7.8443800   | -4.2155690 |
| 1  | -7.4480300  | 6.3779030   | -7.7679410 | 1  | -7.4590520  | 6.4949720   | -7.8519480 |
| 7  | -4.8311570  | -9.9106500  | -5.9994850 | 7  | -4.6887320  | -9.8082470  | -6.0542630 |
| 1  | -5.0792770  | -10.8850980 | -4.1651710 | 1  | -4.9978710  | -10.7386000 | -4.2068040 |
| 1  | -4.7026670  | -8.8464810  | -7.8000390 | 1  | -4.4827400  | -8.7807830  | -7.8681160 |
| 78 | -3.9794300  | -11.6371020 | 6.4728020  | 78 | -3.9794670  | -11.5110410 | 6.5401760  |
| 78 | -3.8974620  | -11.6464460 | -6.8735110 | 78 | -3.8384600  | -11.6089640 | -6.8911000 |
| 78 | 11.9536780  | 2.6358260   | -6.5963420 | 78 | 11.9608690  | 2.6002300   | -6.6527320 |
| 78 | 11.8346040  | 2.3132010   | 6.6823050  | 78 | 11.7607760  | 2.3874570   | 6.7925230  |
| 15 | -10.3252460 | 8.9576550   | -7.6830410 | 15 | -10.3761010 | 9.0446590   | -7.6582610 |
| 15 | -7.9446470  | 11.3950870  | -7.3582700 | 15 | -8.0098920  | 11.4984290  | -7.3312980 |
| 15 | -7.9147120  | 11.2384320  | 7.4864160  | 15 | -7.7729250  | 11.2014120  | 7.5912080  |
| 15 | -10.3880060 | 8.7661930   | 7.3565270  | 15 | -10.2399490 | 8.7251280   | 7.5006980  |
| 15 | 13.6620490  | 1.2212350   | -7.2433580 | 15 | 13.7228820  | 1.2164790   | -7.2148780 |
| 15 | 12.9174480  | 4.5589750   | -7.4451250 | 15 | 12.8918100  | 4.5276110   | -7.5229300 |
| 15 | 12.6503040  | 4.3240470   | 7.4637470  | 15 | 12.5618800  | 4.4105210   | 7.5585430  |
| 15 | 13.5208770  | 0.9462310   | 7.5267760  | 15 | 13.4536010  | 1.0241010   | 7.6156150  |
| 15 | -6.0742060  | -12.1601520 | 7.2898840  | 15 | -6.1136560  | -11.9336690 | 7.3090490  |
| 15 | -2.8652340  | -13.5513100 | 7.1825370  | 15 | -2.9658350  | -13.4668150 | 7.2768270  |
| 15 | -5.9475240  | -12.5034510 | -7.5675610 | 15 | -5.9186620  | -12.3894540 | -7.5715920 |
| 15 | -2.5464740  | -13.3320870 | -7.6888280 | 15 | -2.5567020  | -13.3628390 | -7.6718530 |
| 1  | -7.5712240  | 6.1677390   | 7.4539590  | 1  | -7.3529390  | 6.1385350   | 7.5395220  |
| 1  | 11.2462190  | 4.0085990   | -3.9883510 | 1  | 11.1475710  | 3.9893850   | -4.0880690 |
| 6  | -6.3437140  | -12.3077440 | -9.3516470 | 6  | -6.3056640  | -12.1905790 | -9.3569080 |
| 1  | -7.3561140  | -12.7183740 | -9.5359280 | 1  | -7.3325640  | -12.5631090 | -9.5416910 |
| 1  | -6.2833190  | -11.2371220 | -9.6176110 | 1  | -6.2034310  | -11.1246390 | -9.6293400 |
| 1  | -5.5894400  | -12.8274800 | -9.9656470 | 1  | -5.5693570  | -12.7409050 | -9.9664460 |
| 6  | -7.3264890  | -11.6216960 | -6.7164520 | 6  | -7.2560710  | -11.4473430 | -6.7201810 |
| 1  | -7.2297200  | -11.8073010 | -5.6323430 | 1  | -7.1574080  | -11.6276870 | -5.6350900 |
| 1  | -7.2753300  | -10.5404580 | -6.9349370 | 1  | -7.1623260  | -10.3707960 | -6.9475990 |
| 1  | -8.2874990  | -12.0264960 | -7.0886010 | 1  | -8.2355890  | -11.8161490 | -7.0813510 |
| 6  | -6.3043370  | -14.2769260 | -7.2134260 | 6  | -6.3433680  | -14.1425370 | -7.1972880 |
| 1  | -5.8490940  | -14.9113780 | -7.9940190 | 1  | -5.8790480  | -14.8077240 | -7.9461440 |
| 1  | -5.9111650  | -14.5670820 | -6.2221750 | 1  | -5.9930670  | -14.4233050 | -6.1869690 |
| 1  | -7.4021830  | -14.4182340 | -7.2463100 | 1  | -7.4431990  | -14.2513550 | -7.2682890 |
| 6  | -1.9619910  | -14.4284930 | -6.3334720 | 6  | -2.0499070  | -14.4886850 | -6.3097800 |
| 1  | -2.8251330  | -14.9464980 | -5.8726410 | 1  | -2.9430660  | -14.9731360 | -5.8705560 |
| 1  | -1.2257120  | -15.1536180 | -6.7334780 | 1  | -1.3363620  | -15.2417520 | -6.6991870 |
| 1  | -1.4974720  | -13.8146150 | -5.5404470 | 1  | -1.5806300  | -13.8996430 | -5.5010530 |
| 6  | -3.1657440  | -14.4740860 | -8.9894900 | 6  | -3.2018440  | -14.4697690 | -8.9900880 |
| 1  | -4.0106740  | -15.0686370 | -8.6041010 | 1  | -4.0850820  | -15.0216580 | -8.6279520 |
| 1  | -3.4670520  | -13.8649800 | -9.8593940 | 1  | -3.4505990  | -13.8424200 | -9.8637980 |
| 1  | -2.3446880  | -15.1610600 | -9.2729250 | 1  | -2.4094920  | -15.1967030 | -9.2550050 |
| 6  | -1.0081900  | -12.6323070 | -8.4298080 | 6  | -0.9773660  | -12.7268590 | -8.3809750 |
| 1  | -0.4312540  | -13.4530920 | -8.8983160 | 1  | -0.4232710  | -13.5685960 | -8.8396980 |
| 1  | -1.2779900  | -11.8732510 | -9.1853060 | 1  | -1.2005960  | -11.9539900 | -9.1384620 |
| 1  | -0.3974970  | -12.1676350 | -7.6351900 | 1  | -0.3669530  | -12.2868360 | -7.5720640 |

|   |             |             |             |   |             |             |             |
|---|-------------|-------------|-------------|---|-------------|-------------|-------------|
| 6 | -7.1986350  | -12.7047290 | 5.9405600   | 6 | -7.2301410  | -12.4395820 | 5.9389030   |
| 1 | -7.2089870  | -11.9426690 | 5.1399880   | 1 | -7.1776730  | -11.6907690 | 5.1277590   |
| 1 | -6.8150130  | -13.6390640 | 5.4871450   | 1 | -6.8845010  | -13.3990800 | 5.5083910   |
| 1 | -8.2208660  | -12.8452420 | 6.3444560   | 1 | -8.2682170  | -12.5207350 | 6.3179440   |
| 6 | -2.4274800  | -13.6127920 | 8.9665090   | 6 | -2.5555460  | -13.5363270 | 9.0666970   |
| 1 | -1.8748270  | -14.5523420 | 9.1644130   | 1 | -2.0444740  | -14.4965120 | 9.2771250   |
| 1 | -1.8214100  | -12.7231050 | 9.2155670   | 1 | -1.9169980  | -12.6706390 | 9.3193650   |
| 1 | -3.3395550  | -13.5516170 | 9.5832930   | 1 | -3.4727860  | -13.4348670 | 9.6705870   |
| 6 | -6.8842710  | -10.6663660 | 8.0092730   | 6 | -6.8653860  | -10.3942290 | 7.9924580   |
| 1 | -6.2114980  | -10.2056990 | 8.7544450   | 1 | -6.1939870  | -9.9649920  | 8.7575340   |
| 1 | -7.0997260  | -9.9417600  | 7.2035360   | 1 | -7.0100690  | -9.6655720  | 7.1747060   |
| 1 | -7.8357460  | -10.9702190 | 8.4873040   | 1 | -7.8485510  | -10.6415420 | 8.4379030   |
| 6 | -3.6581650  | -15.1813660 | 6.8467100   | 6 | -3.8255270  | -15.0603500 | 6.9347500   |
| 1 | -4.1537910  | -15.1834350 | 5.8587090   | 1 | -4.2789500  | -15.0526980 | 5.9264300   |
| 1 | -2.8703880  | -15.9590380 | 6.8785770   | 1 | -3.0809190  | -15.8763640 | 7.0134210   |
| 1 | -4.3975430  | -15.4046380 | 7.6356970   | 1 | -4.6103750  | -15.2312120 | 7.6922120   |
| 6 | -6.2682200  | -13.4264330 | 8.6083560   | 6 | -6.3951960  | -13.1752710 | 8.6350050   |
| 1 | -5.6548200  | -13.1119130 | 9.4704800   | 1 | -5.7833670  | -12.8838250 | 9.5063560   |
| 1 | -7.3362260  | -13.4686950 | 8.8981040   | 1 | -7.4694040  | -13.1627080 | 8.9040290   |
| 1 | -5.9608800  | -14.4175270 | 8.2353200   | 1 | -6.1300580  | -14.1837320 | 8.2760040   |
| 6 | -1.2338700  | -13.6942700 | 6.3327070   | 6 | -1.3338650  | -13.6847120 | 6.4450840   |
| 1 | -1.4203800  | -13.7925710 | 5.2489250   | 1 | -1.5150150  | -13.7782360 | 5.3597690   |
| 1 | -0.6192150  | -12.8018050 | 6.5451730   | 1 | -0.6842840  | -12.8177630 | 6.6593040   |
| 1 | -0.7156960  | -14.5953090 | 6.7141590   | 1 | -0.8586790  | -14.6059950 | 6.8340800   |
| 6 | -10.6184620 | 7.0341550   | 7.9491350   | 6 | -10.4526450 | 6.9827950   | 8.0665760   |
| 1 | -10.5272370 | 6.3403550   | 7.0942670   | 1 | -10.3591540 | 6.3055180   | 7.1986600   |
| 1 | -9.8476660  | 6.7981360   | 8.7046720   | 1 | -9.6713790  | 6.7410360   | 8.8101960   |
| 1 | -11.6294550 | 6.9369560   | 8.3900630   | 1 | -11.4590130 | 6.8674530   | 8.5136640   |
| 6 | -11.0819420 | 9.7774570   | 8.7265350   | 6 | -10.9069220 | 9.7109730   | 8.9022850   |
| 1 | -10.4388570 | 9.6314730   | 9.6118450   | 1 | -10.2475890 | 9.5463090   | 9.7724060   |
| 1 | -11.1285160 | 10.8400760  | 8.4361830   | 1 | -10.9558570 | 10.7796050  | 8.6347780   |
| 1 | -12.1083520 | 9.4196540   | 8.9383970   | 1 | -11.9305280 | 9.3514300   | 9.1247360   |
| 6 | -9.2378930  | 12.4821500  | 7.1705720   | 6 | -9.1066550  | 12.4341740  | 7.2837410   |
| 1 | -10.0548620 | 12.3505630  | 7.9014050   | 1 | -9.9319230  | 12.2811790  | 8.0009170   |
| 1 | -8.8022450  | 13.4904810  | 7.3115660   | 1 | -8.6853120  | 13.4455150  | 7.4459570   |
| 1 | -9.6384620  | 12.3779800  | 6.1457430   | 1 | -9.4952210  | 12.3399890  | 6.2529300   |
| 6 | -7.6021690  | 11.3462390  | 9.2938980   | 6 | -7.4294770  | 11.3187880  | 9.3918730   |
| 1 | -6.7318640  | 10.7129700  | 9.5439700   | 1 | -6.5543070  | 10.6869650  | 9.6287820   |
| 1 | -7.4268900  | 12.4067190  | 9.5623940   | 1 | -7.2507810  | 12.3803450  | 9.6537350   |
| 1 | -8.4597800  | 10.9340650  | 9.8512090   | 1 | -8.2767800  | 10.9070150  | 9.9653350   |
| 6 | -6.4187920  | 12.0186140  | 6.7402080   | 6 | -6.2970890  | 11.9782150  | 6.8048310   |
| 1 | -6.5868240  | 12.1090940  | 5.6526890   | 1 | -6.4912820  | 12.0525610  | 5.7201480   |
| 1 | -6.2822540  | 13.0214930  | 7.1892320   | 1 | -6.1532200  | 12.9874060  | 7.2371450   |
| 1 | -5.5278470  | 11.4004560  | 6.9489810   | 1 | -5.4007110  | 11.3633970  | 6.9997560   |
| 6 | -11.5823030 | 8.9570340   | 5.9716240   | 6 | -11.4585280 | 8.9435390   | 6.1418750   |
| 1 | -11.5486450 | 9.9942860   | 5.5860330   | 1 | -11.4322800 | 9.9880120   | 5.7760500   |
| 1 | -11.2847960 | 8.2975520   | 5.1358980   | 1 | -11.1769760 | 8.3034160   | 5.2860390   |
| 1 | -12.5999380 | 8.6919680   | 6.3209500   | 1 | -12.4695920 | 8.6728450   | 6.5057260   |
| 6 | -10.5864640 | 9.7055390   | -9.3444870  | 6 | -10.6795230 | 9.8232990   | -9.2981010  |
| 1 | -10.5199540 | 10.8064060  | -9.2870360  | 1 | -10.6229670 | 10.9233580  | -9.2181500  |
| 1 | -9.8139250  | 9.3351640   | -10.0461260 | 1 | -9.9170740  | 9.4762870   | -10.0223670 |
| 1 | -11.5978580 | 9.4287000   | -9.7013460  | 1 | -11.6949110 | 9.5432610   | -9.6409260  |
| 6 | -7.3617740  | 11.6436600  | -9.0821620  | 6 | -7.4679030  | 11.7949560  | -9.0609420  |

|   |             |            |            |   |             |            |            |
|---|-------------|------------|------------|---|-------------|------------|------------|
| 1 | -8.0708810  | 11.2080500 | -9.8074280 | 1 | -8.1852040  | 11.3638620 | -9.7808460 |
| 1 | -7.2236290  | 12.7269270 | -9.2689300 | 1 | -7.3521130  | 12.8845230 | -9.2249850 |
| 1 | -6.4148290  | 11.0895730 | -9.2177380 | 1 | -6.5147530  | 11.2608800 | -9.2290170 |
| 6 | -9.3966000  | 12.5062480 | -7.1446950 | 6 | -9.4666000  | 12.5906650 | -7.0605090 |
| 1 | -9.7728900  | 12.4325020 | -6.1056700 | 1 | -9.8229710  | 12.4857680 | -6.0171670 |
| 1 | -9.0818020  | 13.5449660 | -7.3660260 | 1 | -9.1644460  | 13.6377700 | -7.2588300 |
| 1 | -10.2068090 | 12.2267570 | -7.8410910 | 1 | -10.2869250 | 12.3233230 | -7.7499500 |
| 6 | -11.6923040 | 9.5851980  | -6.6295110 | 6 | -11.7256590 | 9.6377990  | -6.5632800 |
| 1 | -11.6592040 | 9.0628170  | -5.6560580 | 1 | -11.6670710 | 9.0966190  | -5.6013830 |
| 1 | -11.5557720 | 10.6562820 | -6.3995640 | 1 | -11.5939610 | 10.7054360 | -6.3153150 |
| 1 | -12.6579720 | 9.4154420  | -7.1454930 | 1 | -12.7005690 | 9.4690650  | -7.0619600 |
| 6 | -10.7384410 | 7.1847990  | -7.9670390 | 6 | -10.7742450 | 7.2728140  | -7.9664630 |
| 1 | -9.9822390  | 6.7708020  | -8.6589260 | 1 | -10.0294790 | 6.8817050  | -8.6836900 |
| 1 | -10.7253940 | 6.6375690  | -7.0077530 | 1 | -10.7292410 | 6.7090920  | -7.0177320 |
| 1 | -11.7491930 | 7.1198050  | -8.4144640 | 1 | -11.7948350 | 7.2020160  | -8.3900970 |
| 6 | -6.6588340  | 12.2080960 | -6.3186900 | 6 | -6.7085340  | 12.2953420 | -6.2993150 |
| 1 | -5.6909120  | 11.6915650 | -6.4463890 | 1 | -5.7422370  | 11.7833380 | -6.4543320 |
| 1 | -6.5567410  | 13.2639730 | -6.6363480 | 1 | -6.6151310  | 13.3576750 | -6.5976280 |
| 1 | -6.9924160  | 12.1533900 | -5.2660950 | 1 | -7.0225760  | 12.2184110 | -5.2420520 |
| 6 | 13.6770390  | 4.4360800  | -9.1169810 | 6 | 13.7205800  | 4.3817740  | -9.1588420 |
| 1 | 12.9464910  | 4.0057930  | -9.8287170 | 1 | 13.0251110  | 3.9188420  | -9.8859360 |
| 1 | 13.9831970  | 5.4496630  | -9.4424690 | 1 | 14.0204050  | 5.3931160  | -9.4968650 |
| 1 | 14.5715150  | 3.7888940  | -9.0884330 | 1 | 14.6241960  | 3.7521130  | -9.0787940 |
| 6 | 11.6602200  | 5.8880320  | -7.6632240 | 6 | 11.5923280  | 5.7957090  | -7.8333670 |
| 1 | 10.8999290  | 5.5182580  | -8.3748580 | 1 | 10.8678360  | 5.3668210  | -8.5500430 |
| 1 | 11.1962000  | 6.1287950  | -6.6902500 | 1 | 11.0892690  | 6.0548560  | -6.8847200 |
| 1 | 12.1594900  | 6.7905970  | -8.0660420 | 1 | 12.0673710  | 6.7011600  | -8.2583740 |
| 6 | 13.5435390  | 0.6490040  | -8.9845170 | 6 | 13.6775150  | 0.5985620  | -8.9437030 |
| 1 | 12.5612660  | 0.1636450  | -9.1320500 | 1 | 12.7181370  | 0.0734460  | -9.1049380 |
| 1 | 13.5653660  | 1.5027550  | -9.6844700 | 1 | 13.6873610  | 1.4345470  | -9.6649310 |
| 1 | 14.3730330  | -0.0540960 | -9.1971220 | 1 | 14.5383790  | -0.0780890 | -9.1130380 |
| 6 | 13.6508660  | -0.3270240 | -6.2440810 | 6 | 13.7160940  | -0.3077660 | -6.1795820 |
| 1 | 14.4885760  | -0.9721490 | -6.5731390 | 1 | 14.5758490  | -0.9424300 | -6.4698050 |
| 1 | 13.7774930  | -0.0416330 | -5.1831950 | 1 | 13.8059970  | 0.0039900  | -5.1225440 |
| 1 | 12.6960020  | -0.8627790 | -6.3894260 | 1 | 12.7761760  | -0.8652560 | -6.3399480 |
| 6 | 14.1969710  | 5.3153920  | -6.3660870 | 6 | 14.0976850  | 5.3622090  | -6.4177960 |
| 1 | 15.0208620  | 4.6070690  | -6.1722080 | 1 | 14.9411820  | 4.6928070  | -6.1748630 |
| 1 | 14.5790860  | 6.2381630  | -6.8458920 | 1 | 14.4601570  | 6.2869710  | -6.9088390 |
| 1 | 13.7476740  | 5.5316250  | -5.3796970 | 1 | 13.6041420  | 5.5862710  | -5.4545210 |
| 6 | 15.3844120  | 1.8284680  | -7.0187710 | 6 | 15.4197880  | 1.8765730  | -6.9485710 |
| 1 | 15.5844850  | 2.6864390  | -7.6843280 | 1 | 15.6200270  | 2.7213150  | -7.6308580 |
| 1 | 15.5306270  | 2.1445960  | -5.9669390 | 1 | 15.5208970  | 2.2262950  | -5.9022860 |
| 1 | 16.0840420  | 1.0089120  | -7.2753470 | 1 | 16.1497180  | 1.0700960  | -7.1578250 |
| 6 | 11.2980870  | 5.3735360  | 8.1529290  | 6 | 11.1721560  | 5.4612430  | 8.1639890  |
| 1 | 10.7525360  | 4.8041490  | 8.9254650  | 1 | 10.5879960  | 4.8993250  | 8.9149020  |
| 1 | 11.7441220  | 6.2855110  | 8.5954490  | 1 | 11.5871220  | 6.3849710  | 8.6118860  |
| 1 | 10.6090600  | 5.6650050  | 7.3404940  | 1 | 10.5197440  | 5.7296660  | 7.3137910  |
| 6 | 13.3500040  | 5.3213160  | 6.0859170  | 6 | 13.3388650  | 5.3777250  | 6.2015320  |
| 1 | 12.5606790  | 5.4810040  | 5.3273380  | 1 | 12.6239330  | 5.4768690  | 5.3642950  |
| 1 | 13.6968720  | 6.3003760  | 6.4715920  | 1 | 13.6239610  | 6.3802280  | 6.5776950  |
| 1 | 14.1717290  | 4.7626360  | 5.5962660  | 1 | 14.2181040  | 4.8320340  | 5.8076570  |
| 6 | 13.9208820  | 4.3467320  | 8.7934250  | 6 | 13.7729720  | 4.4699030  | 8.9408370  |
| 1 | 13.4594100  | 3.9047500  | 9.6940310  | 1 | 13.3195780  | 3.9589750  | 9.8080860  |

|    |             |             |             |    |             |             |             |
|----|-------------|-------------|-------------|----|-------------|-------------|-------------|
| 1  | 14.8150990  | 3.7748100   | 8.4918790   | 1  | 14.7202630  | 3.9899160   | 8.6436780   |
| 1  | 14.2127980  | 5.3967430   | 8.9895480   | 1  | 13.9719830  | 5.5313730   | 9.1861530   |
| 6  | 15.2601150  | 1.3215620   | 7.0459190   | 6  | 15.1967070  | 1.5454160   | 7.3232040   |
| 1  | 15.3768410  | 1.0907150   | 5.9753000   | 1  | 15.3159600  | 1.9619620   | 6.3063460   |
| 1  | 15.5003260  | 2.3890400   | 7.1818940   | 1  | 15.4894530  | 2.3041490   | 8.0699450   |
| 1  | 15.9333270  | 0.6988960   | 7.6672570   | 1  | 15.8468370  | 0.6584390   | 7.4541710   |
| 6  | 13.5788650  | 0.7464410   | 9.3549650   | 6  | 13.3746970  | 0.6530960   | 9.4137300   |
| 1  | 14.3705000  | 0.0095990   | 9.5956850   | 1  | 14.1956160  | -0.0456360  | 9.6694040   |
| 1  | 13.7918430  | 1.7098100   | 9.8447660   | 1  | 13.4540260  | 1.5853260   | 9.9976370   |
| 1  | 12.5898420  | 0.4025920   | 9.7041650   | 1  | 12.3845260  | 0.2204020   | 9.6451370   |
| 6  | 13.2993210  | -0.7830100  | 6.9258660   | 6  | 13.3734390  | -0.6385870  | 6.8218960   |
| 1  | 13.3438950  | -0.7750070  | 5.8228470   | 1  | 13.5403830  | -0.5051180  | 5.7386290   |
| 1  | 14.1187530  | -1.4079680  | 7.3307730   | 1  | 14.1678840  | -1.2765390  | 7.2553550   |
| 1  | 12.3290270  | -1.1775980  | 7.2766300   | 1  | 12.3880920  | -1.0997370  | 7.0118590   |
| 16 | 10.2676180  | 2.1097770   | 9.9982710   | 16 | 10.1599050  | 2.2469750   | 10.0971180  |
| 8  | 10.4372520  | 0.7279110   | 9.4073060   | 8  | 10.2424950  | 0.8580570   | 9.5076180   |
| 8  | 9.1236850   | 2.9013040   | 9.4247740   | 8  | 9.0929950   | 3.1221510   | 9.4923170   |
| 8  | 11.5391450  | 2.8878190   | 10.1946240  | 8  | 11.4761370  | 2.9347510   | 10.3291490  |
| 6  | 9.7150930   | 1.7320330   | 11.7769510  | 6  | 9.5264060   | 1.9158100   | 11.8583350  |
| 9  | 9.4907340   | 2.8771520   | 12.4552180  | 9  | 9.3706290   | 3.0768270   | 12.5288560  |
| 9  | 10.6789120  | 1.0318630   | 12.4174780  | 9  | 10.4110350  | 1.1443980   | 12.5290810  |
| 9  | 8.5800090   | 1.0007140   | 11.7752160  | 9  | 8.3379910   | 1.2755910   | 11.8198360  |
| 16 | -3.4793880  | -10.2441340 | -10.2337330 | 16 | -3.3294840  | -10.2868810 | -10.2816800 |
| 8  | -4.7160050  | -9.6500510  | -9.6008140  | 8  | -4.5286350  | -9.6245740  | -9.6442460  |
| 8  | -3.4941900  | -11.7363570 | -10.4173580 | 8  | -3.4378400  | -11.7717890 | -10.4850020 |
| 8  | -2.1805220  | -9.6884290  | -9.7113620  | 8  | -1.9992860  | -9.8215180  | -9.7478450  |
| 6  | -3.5685520  | -9.5875920  | -12.0150400 | 6  | -3.3663420  | -9.5989150  | -12.0531300 |
| 9  | -2.5141280  | -10.0259960 | -12.7346550 | 9  | -2.3472730  | -10.1066080 | -12.7778970 |
| 9  | -3.5645260  | -8.2371560  | -12.0206630 | 9  | -3.2576130  | -8.2526800  | -12.0374260 |
| 9  | -4.7050420  | -10.0187590 | -12.6070100 | 9  | -4.5310350  | -9.9306830  | -12.6536780 |
| 16 | 14.1666700  | 3.0333980   | -3.5162380  | 16 | 14.0720170  | 3.1409030   | -3.5203980  |
| 8  | 13.6359910  | 1.6344450   | -3.7429500  | 8  | 13.5871080  | 1.7246940   | -3.7442320  |
| 8  | 13.1295590  | 4.1248170   | -3.6532080  | 8  | 13.0084430  | 4.2009120   | -3.6940570  |
| 8  | 15.4830700  | 3.3140760   | -4.1734370  | 8  | 15.3955010  | 3.4513920   | -4.1490740  |
| 6  | 14.5246880  | 3.0410710   | -1.6471480  | 6  | 14.3857620  | 3.1791430   | -1.6434750  |
| 9  | 13.3781050  | 2.7798800   | -0.9769080  | 9  | 13.2279600  | 2.9100360   | -0.9953390  |
| 9  | 14.9903220  | 4.2440760   | -1.2609300  | 9  | 14.8244840  | 4.3939760   | -1.2637260  |
| 9  | 15.4352120  | 2.0958060   | -1.3392520  | 9  | 15.3024550  | 2.2518200   | -1.3003660  |
| 16 | -3.4832250  | -10.2347540 | 9.8275710   | 16 | -3.4950020  | -10.1099790 | 9.8870890   |
| 8  | -4.3615250  | -11.4396280 | 10.0204360  | 8  | -4.4229390  | -11.2776560 | 10.0752730  |
| 8  | -4.1961820  | -9.0178920  | 9.2984210   | 8  | -4.1513710  | -8.8704900  | 9.3366350   |
| 8  | -2.1375560  | -10.4995570 | 9.1943490   | 8  | -2.1512110  | -10.4322030 | 9.2765960   |
| 6  | -3.0208940  | -9.7481700  | 11.6057670  | 6  | -3.0401870  | -9.6269500  | 11.6681430  |
| 9  | -4.1304340  | -9.4623340  | 12.3194640  | 9  | -4.1501840  | -9.3152960  | 12.3701100  |
| 9  | -2.2159540  | -8.6637630  | 11.6047420  | 9  | -2.2123480  | -8.5600010  | 11.6712460  |
| 9  | -2.3703190  | -10.7686170 | 12.2084850  | 9  | -2.4174010  | -10.6591080 | 12.2801470  |
| 16 | -9.8791030  | 10.7801440  | -3.7019050  | 16 | -9.8590340  | 10.7829220  | -3.6456260  |
| 8  | -10.2228940 | 9.3171360   | -3.8631470  | 8  | -10.1877850 | 9.3199850   | -3.8367540  |
| 8  | -10.8322720 | 11.7375930  | -4.3478710  | 8  | -10.8356030 | 11.7434170  | -4.2507980  |
| 8  | -8.4171580  | 11.1074020  | -3.9173110  | 8  | -8.4054220  | 11.1344710  | -3.8793160  |
| 6  | -10.0884380 | 11.0408900  | -1.8283420  | 6  | -10.0365380 | 10.9958110  | -1.7621880  |
| 9  | -11.3634370 | 10.8160770  | -1.4596540  | 9  | -11.3011290 | 10.7455450  | -1.3748850  |
| 9  | -9.7456090  | 12.2991620  | -1.4850020  | 9  | -9.7027100  | 12.2495830  | -1.3945540  |

|    |             |             |             |    |             |             |             |
|----|-------------|-------------|-------------|----|-------------|-------------|-------------|
| 9  | -9.2828280  | 10.1738490  | -1.1704220  | 9  | -9.2076000  | 10.1236390  | -1.1406480  |
| 16 | 10.5458390  | 2.4039350   | -10.1131540 | 16 | 10.6455370  | 2.2355470   | -10.1838350 |
| 8  | 10.3998990  | 1.0895510   | -9.3860710  | 8  | 10.5461320  | 0.9434190   | -9.4096510  |
| 8  | 11.7968850  | 2.5566350   | -10.9224220 | 8  | 11.9284300  | 2.4397320   | -10.9305340 |
| 8  | 10.1730600  | 3.6229950   | -9.2978370  | 8  | 10.1466570  | 3.4567230   | -9.4440650  |
| 6  | 9.1425320   | 2.3307790   | -11.3936550 | 6  | 9.3320490   | 2.0096540   | -11.5399230 |
| 9  | 9.1245740   | 3.4540960   | -12.1414250 | 9  | 9.2891260   | 3.0930720   | -12.3430870 |
| 9  | 7.9511210   | 2.2181090   | -10.7573780 | 9  | 8.1127700   | 1.8446080   | -10.9729560 |
| 9  | 9.2948890   | 1.2684960   | -12.2107220 | 9  | 9.6077240   | 0.9231460   | -12.2905950 |
| 16 | 14.1341470  | 2.3589280   | 3.7515680   | 16 | 14.1095980  | 2.5838760   | 3.8219890   |
| 8  | 12.8797130  | 3.0671120   | 3.3092990   | 8  | 12.9254890  | 3.4392270   | 3.4586280   |
| 8  | 13.9002340  | 0.9506770   | 4.2550930   | 8  | 13.7589110  | 1.1910400   | 4.2977850   |
| 8  | 15.0891840  | 3.1747560   | 4.5706390   | 8  | 15.1755620  | 3.2663920   | 4.6312010   |
| 6  | 15.0486640  | 2.0582090   | 2.1127700   | 6  | 14.9182350  | 2.2492660   | 2.1328860   |
| 9  | 14.2936390  | 1.2810960   | 1.3057540   | 9  | 14.0732040  | 1.5232120   | 1.3669800   |
| 9  | 16.2243970  | 1.4338290   | 2.3376460   | 9  | 16.0665150  | 1.5579450   | 2.2847820   |
| 9  | 15.2912130  | 3.2302840   | 1.4895230   | 9  | 15.1886580  | 3.4113460   | 1.5040070   |
| 16 | -7.3732600  | 7.7690510   | 9.9688840   | 16 | -7.1903250  | 7.7344780   | 10.0743760  |
| 8  | -8.6358610  | 8.5611580   | 10.1628210  | 8  | -8.4403380  | 8.5317580   | 10.3174410  |
| 8  | -6.1961330  | 8.5379830   | 9.4159690   | 8  | -6.0226040  | 8.5055420   | 9.5044680   |
| 8  | -7.5756050  | 6.4073500   | 9.3569390   | 8  | -7.4195550  | 6.3859530   | 9.4416230   |
| 6  | -6.8234090  | 7.3878830   | 11.7479930  | 6  | -6.5958840  | 7.3131800   | 11.8299830  |
| 9  | -5.6988750  | 6.6400300   | 11.7450580  | 9  | -5.4760330  | 6.5596530   | 11.7822810  |
| 9  | -7.7898090  | 6.7132670   | 12.4059280  | 9  | -7.5487490  | 6.6296860   | 12.4983820  |
| 9  | -6.5739010  | 8.5403120   | 12.4094760  | 9  | -6.3227190  | 8.4499310   | 12.5085540  |
| 16 | -9.5093520  | 11.0466440  | 3.6597090   | 16 | -9.4312820  | 10.9734480  | 3.7686670   |
| 8  | -10.6535370 | 11.6267280  | 4.4411700   | 8  | -10.5391210 | 11.6111030  | 4.5568180   |
| 8  | -9.6466460  | 9.5928340   | 3.2948360   | 8  | -9.6300750  | 9.5186370   | 3.4369700   |
| 8  | -8.1403750  | 11.4426970  | 4.1677600   | 8  | -8.0397920  | 11.3296810  | 4.2469690   |
| 6  | -9.5847860  | 11.9153980  | 1.9693720   | 6  | -9.4999200  | 11.8086880  | 2.0604270   |
| 9  | -10.7195240 | 11.5831750  | 1.3206220   | 9  | -10.6483790 | 11.4932210  | 1.4280760   |
| 9  | -8.5247490  | 11.5349510  | 1.2210730   | 9  | -8.4574010  | 11.3830730  | 1.3113280   |
| 9  | -9.5464790  | 13.2551290  | 2.1226060   | 9  | -9.4237730  | 13.1495770  | 2.1843880   |
| 16 | -7.1275890  | 8.1861520   | -10.2358180 | 16 | -7.2179960  | 8.3603310   | -10.2774140 |
| 8  | -7.9495630  | 7.1607100   | -9.4869710  | 8  | -8.0145380  | 7.3076450   | -9.5386790  |
| 8  | -5.9977740  | 8.7935570   | -9.4397640  | 8  | -6.0856480  | 8.9680250   | -9.4847650  |
| 8  | -7.9296250  | 9.1523150   | -11.0524900 | 8  | -8.0453530  | 9.3311020   | -11.0626070 |
| 6  | -6.2078930  | 7.1175040   | -11.5114800 | 6  | -6.3002550  | 7.3317740   | -11.5867480 |
| 9  | -5.4728150  | 6.1760630   | -10.8711020 | 9  | -5.5369390  | 6.3937800   | -10.9748800 |
| 9  | -5.3785790  | 7.8746660   | -12.2590110 | 9  | -5.4980180  | 8.1176390   | -12.3341290 |
| 9  | -7.0828350  | 6.4954660   | -12.3288140 | 9  | -7.1766020  | 6.7071920   | -12.4005300 |
| 16 | -4.6602190  | -13.7640160 | -3.8293010  | 16 | -4.6687120  | -13.6494930 | -3.8041160  |
| 8  | -5.7316130  | -12.7897600 | -4.2679970  | 8  | -5.6758790  | -12.6090330 | -4.2454500  |
| 8  | -3.3236410  | -13.1363470 | -3.5369200  | 8  | -3.2849970  | -13.1148010 | -3.5471300  |
| 8  | -4.6127950  | -15.0357650 | -4.6284940  | 8  | -4.7270780  | -14.9358700 | -4.5777030  |
| 6  | -5.2675200  | -14.2916380 | -2.1056570  | 6  | -5.2817530  | -14.0984020 | -2.0597860  |
| 9  | -5.3691720  | -13.1996960 | -1.3168170  | 9  | -5.3008830  | -12.9849380 | -1.2942870  |
| 9  | -4.3980330  | -15.1593070 | -1.5484590  | 9  | -4.4606030  | -15.0072480 | -1.4953330  |
| 9  | -6.4777760  | -14.8806390 | -2.1911190  | 9  | -6.5284260  | -14.6095500 | -2.1140370  |
| 16 | -4.6548840  | -13.8148280 | 3.4424310   | 16 | -4.7028690  | -13.6578210 | 3.4941020   |
| 8  | -3.2161100  | -13.6763130 | 3.8905210   | 8  | -3.2638260  | -13.5628700 | 3.9541000   |
| 8  | -5.3470620  | -12.5119110 | 3.1431150   | 8  | -5.3565350  | -12.3348830 | 3.1957800   |
| 8  | -5.4601210  | -14.8033750 | 4.2375890   | 8  | -5.5412980  | -14.6261570 | 4.2792540   |



|   |            |             |           |
|---|------------|-------------|-----------|
| 6 | -4.4712330 | -14.6048200 | 1.7218400 |
| 9 | -3.7008580 | -13.8099290 | 0.9471910 |
| 9 | -5.6797590 | -14.7498910 | 1.1407510 |
| 9 | -3.8857020 | -15.8160610 | 1.8186940 |

|   |            |             |            |
|---|------------|-------------|------------|
| 6 | -4.5283090 | -14.4436370 | 1.7702370  |
| 9 | -3.7236440 | -13.6704630 | 1.0084880  |
| 9 | -5.7350800 | -14.5432020 | 1.1759400  |
| 9 | -3.9856140 | -15.6746370 | 1.8648970  |
| 6 | 1.0562820  | 1.3525560   | 3.8679870  |
| 6 | 2.2228770  | 1.6875160   | 3.0443030  |
| 6 | 0.8088860  | 0.0105360   | 4.2242320  |
| 6 | 3.1011380  | 0.6726840   | 2.6120380  |
| 6 | 3.6216530  | 0.6882950   | 1.2393390  |
| 6 | 1.8298290  | 2.7538520   | 2.1206720  |
| 6 | 2.3287210  | 2.7669850   | 0.8033970  |
| 6 | 3.2450340  | 1.7185410   | 0.3516190  |
| 6 | -1.6256340 | 0.3154430   | 3.7877650  |
| 6 | -1.3703380 | 1.7115370   | 3.4172560  |
| 6 | -0.5586210 | -0.5188400  | 4.1842410  |
| 6 | -0.0547910 | 2.2180300   | 3.4553140  |
| 6 | 0.4240210  | 3.0824360   | 2.3736320  |
| 6 | -2.2558230 | 2.0547600   | 2.2992900  |
| 6 | -1.7945970 | 2.8922530   | 1.2606310  |
| 6 | -0.4268770 | 3.4129650   | 1.2999010  |
| 6 | -1.4987030 | -2.4067390  | 2.8549420  |
| 6 | -2.6009490 | -1.5359830  | 2.4385420  |
| 6 | -0.4945180 | -1.9050110  | 3.7098580  |
| 6 | -2.6660190 | -0.2042130  | 2.8970860  |
| 6 | -3.0549050 | 0.8695000   | 1.9778310  |
| 6 | -2.9118870 | -1.8420470  | 1.0401280  |
| 6 | -3.2785410 | -0.8100650  | 0.1577410  |
| 6 | -3.3567680 | 0.5706860   | 0.6331280  |
| 6 | 1.2566660  | -3.0419320  | 2.3549090  |
| 6 | 0.2131420  | -3.5675500  | 1.4673260  |
| 6 | 0.9127510  | -2.2308260  | 3.4562150  |
| 6 | -1.1382830 | -3.2548210  | 1.7120310  |
| 6 | -2.0190600 | -2.9082420  | 0.5900160  |
| 6 | 0.7309440  | -3.5435430  | 0.0939430  |
| 6 | -0.1173320 | -3.2213790  | -0.9854240 |
| 6 | -1.5240050 | -2.8957640  | -0.7321530 |
| 6 | 2.8411600  | -0.7213570  | 2.9832190  |
| 6 | 3.1971700  | -1.5631540  | 1.8389940  |
| 6 | 1.7190530  | -1.0474700  | 3.7754210  |
| 6 | 2.4109400  | -2.6880680  | 1.5286360  |
| 6 | 2.0868130  | -2.9973740  | 0.1361430  |
| 6 | 3.6826700  | -0.6952040  | 0.7612900  |
| 6 | 3.3725290  | -0.9945340  | -0.5827470 |
| 6 | 2.5595800  | -2.1727720  | -0.9003750 |
| 6 | -0.7437200 | -1.4832280  | -2.4731960 |
| 6 | 0.3651370  | -2.3490400  | -2.0621230 |
| 6 | 1.6794610  | -1.8366990  | -2.0219900 |
| 6 | -0.4960490 | -0.1405170  | -2.8288010 |
| 6 | -2.5288090 | 0.5973640   | -1.5909100 |
| 6 | -2.7789920 | -0.7983720  | -1.2166520 |
| 6 | -1.9114640 | -1.8212560  | -1.6529970 |
| 6 | -1.4052090 | 0.9193480   | -2.3800350 |
| 6 | -0.9501020 | 2.9159340   | -0.9605550 |

|   |            |            |            |
|---|------------|------------|------------|
| 6 | -2.1181180 | 2.5824870  | -0.1379190 |
| 6 | -2.8898990 | 1.4437400  | -0.4466260 |
| 6 | -0.6007160 | 2.1028690  | -2.0601990 |
| 6 | 1.8107640  | 2.2723110  | -1.4578870 |
| 6 | 1.4438650  | 3.1077350  | -0.3131760 |
| 6 | 0.0942550  | 3.4256620  | -0.0702600 |
| 6 | 0.8056880  | 1.7755540  | -2.3138840 |
| 6 | 1.9385640  | -0.4422990 | -2.3929010 |
| 6 | 2.9856110  | 0.0771690  | -1.5048200 |
| 6 | 2.9233150  | 1.4090040  | -1.0461200 |
| 6 | 0.8704980  | 0.3893230  | -2.7887370 |

**Pt<sub>6</sub>PBI<sub>3</sub>⊃C<sub>70</sub>**

Gas-phase. BLYP-D3(BJ)/def2-SVP

| Atom | X          | Y         | Z         |
|------|------------|-----------|-----------|
| 7    | 10.0862130 | 3.4346680 | 5.8034580 |
| 6    | 10.1472020 | 3.7591240 | 4.4835640 |
| 6    | 8.9098390  | 3.5441440 | 6.4814060 |
| 6    | 9.0181830  | 4.2036390 | 3.7902460 |
| 1    | 11.1267340 | 3.6284310 | 3.9921610 |
| 6    | 7.7428220  | 3.9793290 | 5.8482290 |
| 1    | 8.9273010  | 3.2874480 | 7.5548580 |
| 6    | 7.7765960  | 4.3167280 | 4.4674410 |
| 1    | 9.1027020  | 4.4540840 | 2.7253510 |
| 1    | 6.8038140  | 4.0578370 | 6.4105500 |
| 6    | 6.5899440  | 4.7497040 | 3.8142860 |
| 6    | 5.4876930  | 5.1099980 | 3.4045680 |
| 6    | 4.2789540  | 5.5518580 | 2.8022670 |
| 6    | 4.2916430  | 5.7556650 | 1.3938070 |
| 6    | 3.0714840  | 5.7514220 | 3.5224340 |
| 6    | 3.1487340  | 6.1250860 | 0.6795220 |
| 1    | 5.2326330  | 5.5453960 | 0.8763140 |
| 6    | 2.9986880  | 5.3812720 | 4.9624240 |
| 6    | 1.9168070  | 6.2453850 | 2.8386980 |
| 6    | 1.9482910  | 6.4284730 | 1.4076430 |
| 8    | 3.9356640  | 4.8779320 | 5.5846750 |
| 7    | 1.7669750  | 5.5983950 | 5.6107450 |
| 6    | 0.7167160  | 6.5034340 | 3.5712220 |
| 6    | 0.7556030  | 6.8386880 | 0.7209390 |
| 6    | 0.6191350  | 6.1775640 | 5.0221320 |
| 6    | 1.6969820  | 5.1767830 | 7.0218530 |
| 6    | -0.4111720 | 7.0391860 | 2.8934180 |
| 6    | -0.3674290 | 7.1838960 | 1.4777190 |
| 8    | -0.4034340 | 6.3606280 | 5.6832980 |
| 1    | 1.8930930  | 4.0902380 | 7.0935330 |
| 1    | 2.4737160  | 5.7001560 | 7.6095060 |
| 1    | 0.6916020  | 5.4196530 | 7.3972020 |
| 6    | -1.6085480 | 7.4395140 | 3.5461400 |
| 1    | -1.2797510 | 7.5452660 | 0.9927800 |

**Pt<sub>6</sub>PBI<sub>3</sub>⊃Sc<sub>3</sub>N@C<sub>80</sub>**

Gas-phase. BLYP-D3(BJ)/def2-SVP

| Atom | X          | Y         | Z        |
|------|------------|-----------|----------|
| 7    | 9.9323717  | -3.186148 | 5.753901 |
| 6    | 9.7705720  | -3.122174 | 4.429838 |
| 6    | 9.3967821  | -2.234133 | 6.517103 |
| 6    | 9.0935885  | -2.088296 | 3.818812 |
| 1    | 10.1988400 | -3.912349 | 3.830957 |
| 6    | 8.7000146  | -1.164344 | 5.992161 |
| 1    | 9.4907690  | -2.369590 | 7.584145 |
| 6    | 8.5478676  | -1.070535 | 4.605702 |
| 1    | 8.9873103  | -2.070311 | 2.746124 |
| 1    | 8.2708388  | -0.410797 | 6.632973 |
| 6    | 7.8547216  | -0.001939 | 4.011830 |
| 6    | 7.2384044  | 0.931409  | 3.553167 |
| 6    | 6.5896097  | 1.964048  | 2.854385 |
| 6    | 6.7235661  | 1.980383  | 1.459535 |
| 6    | 5.8251814  | 2.938795  | 3.494339 |
| 6    | 6.1054906  | 2.936150  | 0.675382 |
| 1    | 7.3066680  | 1.188968  | 1.018738 |
| 6    | 5.6609075  | 2.888034  | 4.953156 |
| 6    | 5.2061405  | 3.944575  | 2.723760 |
| 6    | 5.3335035  | 3.946962  | 1.307547 |
| 8    | 6.1794032  | 2.038356  | 5.650452 |
| 7    | 4.8718754  | 3.878487  | 5.510053 |
| 6    | 4.4421688  | 4.935985  | 3.371546 |
| 6    | 4.6484272  | 4.931548  | 0.548810 |
| 6    | 4.2693467  | 4.919716  | 4.829388 |
| 6    | 4.6622838  | 3.859501  | 6.947587 |
| 6    | 3.8329329  | 5.934479  | 2.610675 |
| 6    | 3.9415647  | 5.916023  | 1.214750 |
| 8    | 3.6385273  | 5.759314  | 5.442183 |
| 1    | 5.1587115  | 2.980520  | 7.350066 |
| 1    | 5.0747368  | 4.765331  | 7.391775 |
| 1    | 3.5936530  | 3.824771  | 7.157191 |
| 6    | 3.0755260  | 6.958898  | 3.205164 |
| 1    | 3.4276151  | 6.696154  | 0.678200 |

|   |            |           |            |   |            |           |           |
|---|------------|-----------|------------|---|------------|-----------|-----------|
| 6 | -2.6730090 | 7.8690150 | 3.9880470  | 6 | 2.4017288  | 7.883801  | 3.595529  |
| 6 | 3.1107850  | 6.0848100 | -0.7955510 | 6 | 6.1547392  | 2.877573  | -0.779176 |
| 6 | 0.7176630  | 6.7971100 | -0.7544400 | 6 | 4.6362924  | 4.826900  | -0.904230 |
| 6 | -3.8537160 | 8.3124770 | 4.6441830  | 6 | 1.6346490  | 8.882270  | 4.220966  |
| 6 | 4.2185230  | 5.6831370 | -1.5462380 | 6 | 6.9138431  | 1.936688  | -1.451095 |
| 6 | 1.8768660  | 6.3554740 | -1.4782630 | 6 | 5.3561425  | 3.776315  | -1.533578 |
| 6 | -0.4423690 | 7.1071770 | -1.4698780 | 6 | 3.8978802  | 5.691849  | -1.689851 |
| 6 | -4.8900120 | 8.9887810 | 3.9486060  | 6 | 0.7387566  | 9.685890  | 3.511510  |
| 6 | -4.0279710 | 8.0848180 | 6.0369670  | 6 | 1.7305876  | 9.071847  | 5.603763  |
| 6 | 4.1529310  | 5.4571830 | -2.9505630 | 6 | 6.8195577  | 1.764045  | -2.837822 |
| 1 | 5.1808250  | 5.4875720 | -1.0634220 | 1 | 7.5873397  | 1.282030  | -0.923001 |
| 6 | 1.7891080  | 6.1444210 | -2.9038640 | 6 | 5.2430153  | 3.595812  | -2.937914 |
| 1 | -1.3357810 | 7.4747830 | -0.9553410 | 1 | 3.3589136  | 6.518558  | -1.258080 |
| 6 | -0.5379870 | 6.9486360 | -2.8817920 | 6 | 3.7861708  | 5.522510  | -3.076152 |
| 6 | -6.0488690 | 9.3651990 | 4.6305690  | 6 | -0.0243625 | 10.606483 | 4.200842  |
| 1 | -4.7943100 | 9.2101110 | 2.8782380  | 1 | 0.6296176  | 9.585788  | 2.443543  |
| 6 | -5.2146420 | 8.4855570 | 6.6566720  | 6 | 0.9396302  | 10.029753 | 6.203848  |
| 1 | -3.2407290 | 7.5833370 | 6.6138300  | 1 | 2.4047311  | 8.459487  | 6.181244  |
| 6 | 2.9209910  | 5.6541060 | -3.6289810 | 6 | 5.9405603  | 2.553976  | -3.581664 |
| 6 | 5.3543130  | 5.0422690 | -3.5886730 | 6 | 7.6120340  | 0.772020  | -3.442079 |
| 6 | 0.5692250  | 6.4193230 | -3.5971880 | 6 | 4.4291840  | 4.456342  | -3.702596 |
| 6 | -1.7539790 | 7.3529030 | -3.4977300 | 6 | 3.0166642  | 6.468011  | -3.776624 |
| 7 | -6.2097780 | 9.0946200 | 5.9541310  | 7 | 0.0732676  | 10.776143 | 5.518914  |
| 1 | -6.8773820 | 9.9056850 | 4.1446890  | 1 | -0.7366431 | 11.227852 | 3.676546  |
| 1 | -5.4109350 | 8.3307460 | 7.7317160  | 1 | 0.9568197  | 10.177506 | 7.274448  |
| 6 | 2.8228640  | 5.3378340 | -5.0825190 | 6 | 5.7500254  | 2.287924  | -5.014055 |
| 6 | 6.4687780  | 4.7283750 | -4.0042430 | 6 | 8.3645353  | -0.081307 | -3.852070 |
| 6 | 0.4481130  | 6.1517120 | -5.0573680 | 6 | 4.2599403  | 4.249134  | -5.145150 |
| 6 | -2.8258540 | 7.7866840 | -3.9172300 | 6 | 2.3599032  | 7.376816  | -4.228308 |
| 8 | 3.7575160  | 4.8610050 | -5.7274320 | 8 | 6.2709051  | 1.352737  | -5.590440 |
| 7 | 1.5791950  | 5.6049660 | -5.6985140 | 7 | 4.9210194  | 3.164188  | -5.691689 |
| 6 | 7.6865220  | 4.3531590 | -4.6360090 | 6 | 9.1028789  | -1.097896 | -4.483843 |
| 8 | -0.5766370 | 6.3659750 | -5.7067390 | 8 | 3.5775957  | 4.966424  | -5.850170 |
| 6 | -4.0023420 | 8.2398010 | -4.5754570 | 6 | 1.6001949  | 8.426558  | -4.773112 |
| 6 | 1.4281360  | 5.3099040 | -7.1354850 | 6 | 4.7140246  | 2.949612  | -7.113823 |
| 6 | 8.9229900  | 4.3420020 | -3.9389160 | 6 | 10.2602073 | -1.647994 | -3.927671 |
| 6 | 7.6966220  | 3.9792290 | -6.0076140 | 6 | 8.6515014  | -1.618372 | -5.701137 |
| 6 | -5.0738640 | 8.8538230 | -3.8759590 | 6 | 0.9524043  | 9.333825  | -3.929023 |
| 6 | -4.1319860 | 8.0848540 | -5.9830230 | 6 | 1.4577417  | 8.603343  | -6.152390 |
| 1 | 0.5806040  | 4.6156590 | -7.2857440 | 1 | 3.6671150  | 2.710531  | -7.300791 |
| 1 | 1.2034030  | 6.2411900 | -7.6887180 | 1 | 4.9655160  | 3.859818  | -7.657072 |
| 1 | 2.3699050  | 4.8647050 | -7.4902040 | 1 | 5.3505063  | 2.127226  | -7.429552 |
| 6 | 10.0885200 | 3.9484220 | -4.6013130 | 6 | 10.8858172 | -2.689486 | -4.583413 |
| 1 | 8.9730710  | 4.6347790 | -2.8826520 | 1 | 10.6561485 | -1.276325 | -2.995665 |
| 6 | 8.8982020  | 3.5957490 | -6.6090860 | 6 | 9.3329341  | -2.670787 | -6.275097 |
| 1 | 6.7641650  | 3.9883980 | -6.5859920 | 1 | 7.7724457  | -1.202883 | -6.166732 |
| 6 | -6.2184930 | 9.2486720 | -4.5726120 | 6 | 0.2145292  | 10.357200 | -4.484279 |
| 1 | -5.0172120 | 9.0133690 | -2.7918560 | 1 | 1.0242693  | 9.240621  | -2.857404 |

|    |            |            |            |    |            |           |           |
|----|------------|------------|------------|----|------------|-----------|-----------|
| 6  | -5.3055360 | 8.5012760  | -6.6171170 | 6  | 0.7062097  | 9.665114  | -6.616591 |
| 1  | -3.3191780 | 7.6275230  | -6.5612300 | 1  | 1.9287561  | 7.914601  | -6.835507 |
| 7  | 10.0662160 | 3.5743570  | -5.9096580 | 7  | 10.4266604 | -3.204344 | -5.722597 |
| 1  | 8.9699360  | 3.3140850  | -7.6731670 | 1  | 8.9908868  | -3.092890 | -7.208799 |
| 7  | -6.3314120 | 9.0581110  | -5.9150110 | 7  | 0.1024974  | 10.528346 | -5.800821 |
| 1  | -7.0774600 | 9.7371640  | -4.0813450 | 1  | -0.2975764 | 11.064157 | -3.848049 |
| 1  | -5.4654100 | 8.3966340  | -7.7043130 | 1  | 0.5401917  | 9.814869  | -7.674528 |
| 78 | -8.3033950 | 9.1005510  | -6.8069880 | 78 | -1.1932683 | 12.076675 | -6.357343 |
| 78 | -8.2139500 | 9.0688200  | 6.7551880  | 78 | -1.3959707 | 12.014498 | 6.345530  |
| 7  | 10.6864610 | 0.7138730  | 5.9013830  | 7  | 9.1706225  | -5.787288 | 5.525413  |
| 6  | 9.6532430  | 0.1875370  | 6.6157930  | 6  | 8.0120963  | -5.511355 | 6.129006  |
| 6  | 10.8433710 | 0.3967690  | 4.5880670  | 6  | 9.1478902  | -6.293015 | 4.292930  |
| 6  | 8.7167960  | -0.6629110 | 6.0217240  | 6  | 6.7919633  | -5.703712 | 5.514198  |
| 1  | 9.6166320  | 0.4637240  | 7.6835460  | 1  | 8.0626400  | -5.120084 | 7.135684  |
| 6  | 9.9426960  | -0.4448290 | 3.9314900  | 6  | 7.9756307  | -6.512304 | 3.596547  |
| 1  | 11.7322880 | 0.8143670  | 4.0923550  | 1  | 10.1075424 | -6.482352 | 3.832817  |
| 6  | 8.8400820  | -0.9866890 | 4.6425400  | 6  | 6.7588100  | -6.195739 | 4.205030  |
| 1  | 7.8872570  | -1.0744730 | 6.6104620  | 1  | 5.8687559  | -5.464075 | 6.017086  |
| 1  | 10.0953560 | -0.6793970 | 2.8706430  | 1  | 8.0058083  | -6.909405 | 2.594028  |
| 6  | 7.8844420  | -1.8319250 | 4.0145850  | 6  | 5.5238149  | -6.323837 | 3.544661  |
| 6  | 7.0020720  | -2.5759080 | 3.5893250  | 6  | 4.3915792  | -6.350635 | 3.120929  |
| 6  | 6.0719380  | -3.4368920 | 2.9459550  | 6  | 3.1336758  | -6.442371 | 2.499708  |
| 6  | 6.2017260  | -3.5886790 | 1.5366250  | 6  | 3.0885798  | -6.615276 | 1.112191  |
| 6  | 5.0159790  | -4.1040750 | 3.6204910  | 6  | 1.9459621  | -6.336133 | 3.228145  |
| 6  | 5.3104530  | -4.3541100 | 0.7799050  | 6  | 1.8888868  | -6.682257 | 0.424425  |
| 1  | 7.0008340  | -3.0184240 | 1.0531860  | 1  | 4.0321949  | -6.657332 | 0.593778  |
| 6  | 4.7502040  | -3.8077930 | 5.0542460  | 6  | 1.9925345  | -5.990580 | 4.654959  |
| 6  | 4.1724580  | -5.0025160 | 2.8950790  | 6  | 0.7163510  | -6.540761 | 2.570112  |
| 6  | 4.3110800  | -5.1259960 | 1.4644860  | 6  | 0.6780793  | -6.735397 | 1.162877  |
| 8  | 5.3796240  | -2.9706520 | 5.7033340  | 8  | 3.0283401  | -5.767206 | 5.251314  |
| 7  | 3.6911520  | -4.5120840 | 5.6606820  | 7  | 0.7719609  | -5.908333 | 5.299584  |
| 6  | 3.1573440  | -5.7341040 | 3.5861290  | 6  | -0.4789605 | -6.517407 | 3.316159  |
| 6  | 3.4008460  | -5.9634260 | 0.7352810  | 6  | -0.5734328 | -6.915591 | 0.516769  |
| 6  | 2.9009560  | -5.5051640 | 5.0362860  | 6  | -0.4638272 | -6.188681 | 4.746350  |
| 6  | 3.4105910  | -4.1712050 | 7.0673120  | 6  | 0.7615606  | -5.521189 | 6.699858  |
| 6  | 2.3526680  | -6.6580680 | 2.8665050  | 6  | -1.6895614 | -6.787982 | 2.675050  |
| 6  | 2.4866430  | -6.7411150 | 1.4514250  | 6  | -1.7183067 | -6.994297 | 1.291298  |
| 8  | 2.0299190  | -6.1056420 | 5.6662240  | 8  | -1.4629425 | -6.139493 | 5.437004  |
| 1  | 4.3093000  | -4.3530650 | 7.6855560  | 1  | 1.7897623  | -5.372282 | 7.018354  |
| 1  | 3.1591790  | -3.0965890 | 7.1439550  | 1  | 0.1900371  | -4.600609 | 6.817123  |
| 1  | 2.5709780  | -4.7966240 | 7.4060550  | 1  | 0.2879757  | -6.303418 | 7.292410  |
| 6  | 1.3954660  | -7.5157700 | 3.4740320  | 6  | -2.9046826 | -6.843735 | 3.379267  |
| 1  | 1.8052530  | -7.4231490 | 0.9331730  | 1  | -2.6832008 | -7.171703 | 0.846148  |
| 6  | 0.5779710  | -8.3441120 | 3.8724690  | 6  | -4.0012273 | -6.941432 | 3.878391  |
| 6  | 5.2893840  | -4.2875380 | -0.6944410 | 6  | 1.8316613  | -6.660152 | -1.029762 |
| 6  | 3.3968080  | -5.9168540 | -0.7402970 | 6  | -0.6231888 | -6.963904 | -0.938460 |
| 6  | -0.3435950 | -9.2403010 | 4.4803630  | 6  | -5.2190759 | -7.034040 | 4.573973  |
| 6  | 6.1457350  | -3.4397970 | -1.4018280 | 6  | 2.9634793  | -6.455443 | -1.795333 |

|   |            |             |            |   |            |           |           |
|---|------------|-------------|------------|---|------------|-----------|-----------|
| 6 | 4.2921940  | -5.0230440  | -1.4205080 | 6 | 0.5740666  | -6.776275 | -1.679644 |
| 6 | 2.4939680  | -6.6679330  | -1.4983600 | 6 | -1.8136144 | -7.114377 | -1.624880 |
| 6 | -1.0454010 | -10.2205270 | 3.7303270  | 6 | -6.4144320 | -7.340398 | 3.918372  |
| 6 | -0.5907890 | -9.1735990  | 5.8791100  | 6 | -5.2688352 | -6.815567 | 5.954522  |
| 6 | 6.0253590  | -3.2237510  | -2.8039070 | 6 | 2.9089541  | -6.366326 | -3.192542 |
| 1 | 6.9249130  | -2.8722830  | -0.8839560 | 1 | 3.9330069  | -6.343662 | -1.339109 |
| 6 | 4.1618820  | -4.8325890  | -2.8456110 | 6 | 0.5105021  | -6.675760 | -3.096389 |
| 1 | 1.8205860  | -7.3843900  | -1.0175250 | 1 | -2.7413622 | -7.281813 | -1.103263 |
| 6 | 2.3829280  | -6.5340330  | -2.9116430 | 6 | -1.8810256 | -7.033904 | -3.021831 |
| 6 | -1.9753020 | -11.0447380 | 4.3678090  | 6 | -7.5821008 | -7.417003 | 4.649735  |
| 1 | -0.8730230 | -10.3297630 | 2.6522550  | 1 | -6.4299519 | -7.511758 | 2.853746  |
| 6 | -1.5357350 | -10.0283620 | 6.4529440  | 6 | -6.4818909 | -6.920309 | 6.604619  |
| 1 | -0.0540420 | -8.4434650  | 6.4977940  | 1 | -4.3662777 | -6.566356 | 6.489433  |
| 6 | 5.0047020  | -3.8978850  | -3.5263730 | 6 | 1.6836193  | -6.465095 | -3.849703 |
| 6 | 6.9603950  | -2.3345040  | -3.4011910 | 6 | 4.1247617  | -6.186266 | -3.875059 |
| 6 | 3.1862240  | -5.5738460  | -3.5828700 | 6 | -0.7260700 | -6.783111 | -3.764522 |
| 6 | 1.4633550  | -7.3920570  | -3.5744110 | 6 | -3.1342716 | -7.194645 | -3.639143 |
| 7 | -2.2272180 | -10.9282800 | 5.6998410  | 7 | -7.6148296 | -7.220779 | 5.968146  |
| 1 | -2.5380310 | -11.8304950 | 3.8371150  | 1 | -8.5164200 | -7.653075 | 4.160665  |
| 1 | -1.7730220 | -10.0190920 | 7.5308440  | 1 | -6.5669860 | -6.737048 | 7.666765  |
| 6 | 4.8193790  | -3.6146450  | -4.9785870 | 6 | 1.6315011  | -6.350405 | -5.311707 |
| 6 | 7.8505090  | -1.5853950  | -3.8009370 | 6 | 5.2440391  | -6.062871 | -4.314668 |
| 6 | 3.0010900  | -5.3442750  | -5.0426210 | 6 | -0.8165196 | -6.631340 | -5.223450 |
| 6 | 0.6755470  | -8.2163860  | -4.0356700 | 6 | -4.2559626 | -7.371604 | -4.055286 |
| 8 | 5.4847440  | -2.7752620  | -5.5868160 | 8 | 2.6146053  | -6.189907 | -6.008329 |
| 7 | 3.8205010  | -4.3640750  | -5.6401370 | 7 | 0.3786405  | -6.433209 | -5.890994 |
| 6 | 8.8076870  | -0.7551720  | -4.4474530 | 6 | 6.5263618  | -5.907765 | -4.869177 |
| 8 | 2.1726720  | -5.9460110  | -5.7275820 | 8 | -1.8687093 | -6.672133 | -5.831018 |
| 6 | -0.2089060 | -9.0808890  | -4.7376610 | 6 | -5.5013594 | -7.455629 | -4.702788 |
| 6 | 3.5963020  | -4.1237590  | -7.0777870 | 6 | 0.3409882  | -6.296722 | -7.337235 |
| 6 | 9.8729580  | -0.1346740  | -3.7442270 | 6 | 7.6410881  | -5.752616 | -4.039559 |
| 6 | 8.7225230  | -0.5346850  | -5.8496780 | 6 | 6.7335352  | -5.887785 | -6.251554 |
| 6 | -0.4276820 | -8.8949550  | -6.1301150 | 6 | -5.6608880 | -6.872876 | -5.964968 |
| 6 | -0.9058230 | -10.1368100 | -4.0955150 | 6 | -6.6145850 | -8.066497 | -4.120369 |
| 1 | 2.5481850  | -3.8125450  | -7.2452550 | 1 | -0.6859700 | -6.435431 | -7.664785 |
| 1 | 4.2947190  | -3.3379200  | -7.4025690 | 1 | 0.6994835  | -5.307588 | -7.621744 |
| 1 | 3.7650170  | -5.0585310  | -7.6442950 | 1 | 0.9914770  | -7.045163 | -7.788597 |
| 6 | 10.7805010 | 0.6727040   | -4.4344390 | 6 | 8.8838976  | -5.580724 | -4.610961 |
| 1 | 9.9926360  | -0.2825950  | -2.6635950 | 1 | 7.5360900  | -5.759903 | -2.966591 |
| 6 | 9.6633320  | 0.2862230   | -6.4775330 | 6 | 8.0171099  | -5.718893 | -6.732533 |
| 1 | 7.9182740  | -1.0034580  | -6.4306020 | 1 | 5.8961065  | -5.996185 | -6.922308 |
| 6 | -1.3376960 | -9.7152870  | -6.8018180 | 6 | -6.9105053 | -6.872361 | -6.548185 |
| 1 | 0.1033010  | -8.0997230  | -6.6684100 | 1 | -4.8158356 | -6.419309 | -6.457261 |
| 6 | -1.8033810 | -10.9192930 | -4.8266890 | 6 | -7.8231797 | -8.030523 | -4.787932 |
| 1 | -0.7635560 | -10.3358880 | -3.0259620 | 1 | -6.5388630 | -8.548489 | -3.158254 |
| 7 | 10.6669920 | 0.8802980   | -5.7740900 | 7 | 9.0701667  | -5.568797 | -5.930551 |
| 1 | 11.6418350 | 1.1555540   | -3.9424900 | 1 | 9.7569104  | -5.451058 | -3.987142 |
| 1 | 9.6460530  | 0.4901890   | -7.5623990 | 1 | 8.2139446  | -5.656045 | -7.793791 |

|   |            |             |            |   |            |           |           |
|---|------------|-------------|------------|---|------------|-----------|-----------|
| 7 | -2.0239120 | -10.6959090 | -6.1510530 | 7 | -7.9757139 | -7.424527 | -5.963831 |
| 1 | -1.5414850 | -9.5978770  | -7.8804340 | 1 | -7.0662409 | -6.408174 | -7.512072 |
| 1 | -2.3926410 | -11.7272620 | -4.3584410 | 1 | -8.7144135 | -8.449662 | -4.342763 |
| 7 | -8.1064440 | 7.0933930   | 5.8680860  | 7 | -2.6270538 | 10.407626 | 5.822458  |
| 6 | -8.3510870 | 6.9770760   | 4.5342840  | 6 | -3.5291917 | 10.471746 | 4.845169  |
| 6 | -7.5128040 | 6.0709060   | 6.5446760  | 6 | -2.2836766 | 9.208857  | 6.301406  |
| 6 | -7.9914450 | 5.8282520   | 3.8247320  | 6 | -4.0932620 | 9.349251  | 4.275630  |
| 1 | -8.8233040 | 7.8454900   | 4.0426420  | 1 | -3.7570715 | 11.456089 | 4.465851  |
| 6 | -7.1264790 | 4.8950790   | 5.8957160  | 6 | -2.8046056 | 8.032374  | 5.802324  |
| 6 | -7.3531600 | 4.7552050   | 4.4992260  | 6 | -3.7161167 | 8.087244  | 4.744330  |
| 1 | -8.1994000 | 5.7715150   | 2.7489340  | 1 | -4.8064445 | 9.445737  | 3.472080  |
| 1 | -6.6439700 | 4.0858880   | 6.4582770  | 1 | -2.5052306 | 7.079748  | 6.207907  |
| 6 | -6.9547090 | 3.5673150   | 3.8260080  | 6 | -4.2013988 | 6.913738  | 4.140583  |
| 6 | -6.5849490 | 2.4817760   | 3.3811740  | 6 | -4.5776507 | 5.868384  | 3.662797  |
| 6 | -6.2765020 | 1.2477900   | 2.7457840  | 6 | -5.0574315 | 4.757803  | 2.944804  |
| 6 | -6.4280590 | 1.1856300   | 1.3313680  | 6 | -5.2066420 | 4.895956  | 1.559042  |
| 6 | -5.8432470 | 0.0918800   | 3.4480200  | 6 | -5.3729649 | 3.547726  | 3.561129  |
| 6 | -6.1858070 | 0.0187640   | 0.6000310  | 6 | -5.6645027 | 3.860181  | 0.764799  |
| 1 | -6.7156920 | 2.1134380   | 0.8267470  | 1 | -4.9174383 | 5.842127  | 1.132455  |
| 6 | -5.4921150 | 0.1874060   | 4.8916790  | 6 | -5.1000174 | 3.372107  | 4.993261  |
| 6 | -5.7011430 | -1.1445830  | 2.7449940  | 6 | -5.9308236 | 2.507463  | 2.791533  |
| 6 | -5.8747390 | -1.1879640  | 1.3129910  | 6 | -6.0880529 | 2.657333  | 1.387571  |
| 8 | -5.5302280 | 1.2381880   | 5.5331110  | 8 | -4.5837007 | 4.234566  | 5.676062  |
| 7 | -5.0574410 | -0.9995000  | 5.5176910  | 7 | -5.4471815 | 2.147151  | 5.531525  |
| 6 | -5.3532850 | -2.3305810  | 3.4634420  | 6 | -6.3212790 | 1.312437  | 3.429162  |
| 6 | -5.6798360 | -2.4265270  | 0.6139770  | 6 | -6.6283024 | 1.583924  | 0.629290  |
| 6 | -4.9989550 | -2.2744620  | 4.9092350  | 6 | -6.0545128 | 1.103109  | 4.857774  |
| 6 | -4.6378740 | -0.8732730  | 6.9250990  | 6 | -5.1649726 | 1.913679  | 6.937873  |
| 6 | -5.2996870 | -3.5712170  | 2.7745770  | 6 | -6.9537330 | 0.317142  | 2.681487  |
| 6 | -5.4534550 | -3.5873850  | 1.3592320  | 6 | -7.1009758 | 0.468193  | 1.297176  |
| 8 | -4.6378110 | -3.2634800  | 5.5475420  | 8 | -6.3245362 | 0.075827  | 5.448238  |
| 1 | -3.7527650 | -0.2117740  | 6.9908170  | 1 | -4.8058640 | 2.844022  | 7.370044  |
| 1 | -5.4501320 | -0.4146150  | 7.5177160  | 1 | -6.0734898 | 1.581665  | 7.438679  |
| 1 | -4.3968990 | -1.8803050  | 7.2976390  | 1 | -4.4080915 | 1.135241  | 7.035797  |
| 6 | -5.1065190 | -4.8259730  | 3.4150550  | 6 | -7.4523938 | -0.848397 | 3.288704  |
| 1 | -5.3517940 | -4.5587600  | 0.8653190  | 1 | -7.5735174 | -0.341972 | 0.767101  |
| 6 | -5.0269130 | -5.9795870  | 3.8345030  | 6 | -7.9586466 | -1.858454 | 3.719542  |
| 6 | -6.1646060 | 0.0139020   | -0.8761720 | 6 | -5.6753026 | 3.950757  | -0.688831 |
| 6 | -5.6455890 | -2.4290410  | -0.8616420 | 6 | -6.6259371 | 1.668976  | -0.824696 |
| 6 | -4.9384100 | -7.2598850  | 4.4468930  | 6 | -8.4616174 | -2.979042 | 4.403505  |
| 6 | -6.4007350 | 1.1726970   | -1.6205450 | 6 | -5.2157963 | 5.073754  | -1.352290 |
| 6 | -5.8228000 | -1.1943380  | -1.5733660 | 6 | -6.1142770 | 2.835659  | -1.452313 |
| 6 | -5.3749680 | -3.5908340  | -1.5896570 | 6 | -7.0400235 | 0.612774  | -1.615571 |
| 6 | -5.1236350 | -8.4563990  | 3.7061000  | 6 | -9.3218651 | -3.904132 | 3.807118  |
| 6 | -4.6699920 | -7.3801990  | 5.8374470  | 6 | -8.0973876 | -3.192279 | 5.737949  |
| 6 | -6.2410960 | 1.2217920   | -3.0351700 | 6 | -5.1253747 | 5.126058  | -2.749000 |
| 1 | -6.7063640 | 2.1015530   | -1.1284810 | 1 | -4.8899989 | 5.946962  | -0.811827 |
| 6 | -5.6208730 | -1.1601070  | -3.0015610 | 6 | -6.0130702 | 2.877666  | -2.870477 |

|    |            |             |            |    |             |           |           |
|----|------------|-------------|------------|----|-------------|-----------|-----------|
| 1  | -5.2698790 | -4.5563270  | -1.0848650 | 1  | -7.4300314  | -0.291505 | -1.178870 |
| 6  | -5.1986730 | -3.5860090  | -3.0027050 | 6  | -6.9531835  | 0.651890  | -3.012809 |
| 6  | -5.0169850 | -9.6930690  | 4.3469650  | 6  | -9.7555599  | -4.987989 | 4.544067  |
| 1  | -5.3429460 | -8.4228850  | 2.6316190  | 1  | -9.6430038  | -3.782123 | 2.784587  |
| 6  | -4.5776390 | -8.6487820  | 6.4166090  | 6  | -8.5775263  | -4.304737 | 6.397127  |
| 1  | -4.5293580 | -6.4821900  | 6.4520990  | 1  | -7.4464150  | -2.489926 | 6.233231  |
| 6  | -5.7918710 | 0.0634620   | -3.7235410 | 6  | -5.4939375  | 4.019320  | -3.515638 |
| 6  | -6.5804200 | 2.4438000   | -3.6789520 | 6  | -4.6543297  | 6.310895  | -3.342064 |
| 6  | -5.2680070 | -2.3542750  | -3.7060660 | 6  | -6.4278569  | 1.777725  | -3.647930 |
| 6  | -4.9943780 | -4.8431110  | -3.6352060 | 6  | -7.4006960  | -0.474193 | -3.725146 |
| 7  | -4.7406590 | -9.7807700  | 5.6767060  | 7  | -9.3885345  | -5.191866 | 5.810144  |
| 1  | -5.1308690 | -10.6470120 | 3.8024070  | 1  | -10.3926921 | -5.739910 | 4.100017  |
| 1  | -4.3758790 | -8.7822600  | 7.4939320  | 1  | -8.3235222  | -4.473232 | 7.433808  |
| 6  | -5.5133250 | 0.1362410   | -5.1863170 | 6  | -5.3360992  | 4.061285  | -4.976198 |
| 6  | -6.9819270 | 3.5227650   | -4.1122870 | 6  | -4.2710022  | 7.389669  | -3.731937 |
| 6  | -4.9811640 | -2.3175230  | -5.1668140 | 6  | -6.3197046  | 1.804276  | -5.111123 |
| 6  | -4.9062070 | -5.9899570  | -4.0712760 | 6  | -7.8249048  | -1.498069 | -4.207652 |
| 8  | -5.6117640 | 1.1785090   | -5.8349410 | 8  | -4.8538535  | 5.010415  | -5.564067 |
| 7  | -5.1053220 | -1.0670400  | -5.8066100 | 7  | -5.7678384  | 2.944693  | -5.667365 |
| 6  | -7.4196300 | 4.7144630   | -4.7533410 | 6  | -3.7680138  | 8.541764  | -4.361055 |
| 8  | -4.6358770 | -3.3049090  | -5.8177510 | 8  | -6.6838907  | 0.894210  | -5.829546 |
| 6  | -4.8076330 | -7.2377410  | -4.7468400 | 6  | -8.2978149  | -2.667373 | -4.827564 |
| 6  | -4.7933340 | -1.0439030  | -7.2478380 | 6  | -5.6512270  | 2.946847  | -7.115781 |
| 6  | -8.1197640 | 5.7296710   | -4.0502090 | 6  | -3.7524810  | 9.793323  | -3.741018 |
| 6  | -7.1733870 | 4.9186580   | -6.1385700 | 6  | -3.2318727  | 8.444586  | -5.650489 |
| 6  | -4.9740350 | -8.4772360  | -4.0753970 | 6  | -8.5656624  | -3.812745 | -4.074442 |
| 6  | -4.5544940 | -7.2702320  | -6.1457080 | 6  | -8.4948411  | -2.732930 | -6.210395 |
| 1  | -3.7568190 | -1.3937470  | -7.4099710 | 1  | -5.0009184  | 2.131573  | -7.432209 |
| 1  | -5.4700180 | -1.7312140  | -7.7893630 | 1  | -6.6351033  | 2.798292  | -7.559886 |
| 1  | -4.9205990 | -0.0105630  | -7.6038790 | 1  | -5.2359689  | 3.903402  | -7.421861 |
| 6  | -8.5098050 | 6.8927060   | -4.7185850 | 6  | -3.1757939  | 10.861391 | -4.399774 |
| 1  | -8.3511990 | 5.6143150   | -2.9838970 | 1  | -4.1714054  | 9.926197  | -2.756028 |
| 6  | -7.5900170 | 6.1066580   | -6.7449780 | 6  | -2.6656428  | 9.562107  | -6.224181 |
| 1  | -6.6505430 | 4.1506250   | -6.7223990 | 1  | -3.2546237  | 7.499944  | -6.169554 |
| 6  | -4.8597750 | -9.6717340  | -4.7904180 | 6  | -9.0248868  | -4.945336 | -4.713180 |
| 1  | -5.1911010 | -8.5075870  | -3.0002930 | 1  | -8.4162079  | -3.816344 | -3.006866 |
| 6  | -4.4467420 | -8.5012800  | -6.7980810 | 6  | -8.9620344  | -3.908588 | -6.761091 |
| 1  | -4.4381110 | -6.3325420  | -6.7036200 | 1  | -8.2760011  | -1.875277 | -6.826426 |
| 7  | -8.2326450 | 7.0770910   | -6.0382520 | 7  | -2.6195574  | 10.746943 | -5.605320 |
| 1  | -9.0494570 | 7.7147060   | -4.2159100 | 1  | -3.1069465  | 11.829004 | -3.925770 |
| 1  | -7.4332440 | 6.3197090   | -7.8156670 | 1  | -2.2200101  | 9.514329  | -7.209600 |
| 7  | -4.5850510 | -9.6760480  | -6.1229650 | 7  | -9.2318104  | -4.990161 | -6.030516 |
| 1  | -5.0073650 | -10.6605320 | -4.3259590 | 1  | -9.2376003  | -5.836129 | -4.140978 |
| 1  | -4.2526650 | -8.5868260  | -7.8812000 | 1  | -9.0794255  | -4.017436 | -7.829260 |
| 78 | -4.0979400 | -11.6932060 | 6.4594680  | 78 | -9.5372004  | -7.019744 | 6.787811  |
| 78 | -3.8389330 | -11.4977050 | -7.0195520 | 78 | -9.7992956  | -6.849642 | -6.801868 |
| 78 | 11.7742990 | 2.4984200   | -6.6851530 | 78 | 11.0208362  | -5.053776 | -6.492071 |
| 78 | 11.7616510 | 2.4037630   | 6.6980240  | 78 | 10.8787644  | -4.902815 | 6.419456  |

|    |             |             |             |    |             |            |            |
|----|-------------|-------------|-------------|----|-------------|------------|------------|
| 15 | -10.4123990 | 8.8097460   | -7.7016810  | 15 | -2.8183609  | 13.717367  | -6.675522  |
| 15 | -8.0965700  | 11.3159370  | -7.4188040  | 15 | 0.5916724   | 13.257833  | -7.280698  |
| 15 | -8.0451610  | 11.2473440  | 7.5385030   | 15 | 0.2506045   | 13.532788  | 6.977701   |
| 15 | -10.3694890 | 8.6337170   | 7.4542620   | 15 | -3.2533339  | 13.288396  | 6.981027   |
| 15 | 13.5001620  | 1.0936440   | -7.3062000  | 15 | 11.3036953  | -7.154923  | -7.458499  |
| 15 | 12.6899220  | 4.4094560   | -7.6043280  | 15 | 13.2113626  | -4.286698  | -6.766680  |
| 15 | 12.5968590  | 4.4368670   | 7.3958560   | 15 | 12.4719625  | -3.578384  | 7.544032   |
| 15 | 13.4630040  | 1.0631940   | 7.5431190   | 15 | 11.8007738  | -7.053054  | 6.759494   |
| 15 | -6.2611390  | -12.1160430 | 7.1458480   | 15 | -11.7458106 | -6.470380  | 7.307372   |
| 15 | -3.1240080  | -13.6897460 | 7.1397720   | 15 | -9.2445389  | -9.036423  | 7.993313   |
| 15 | -5.9484390  | -12.1192850 | -7.7578040  | 15 | -11.6562334 | -5.869619  | -7.839265  |
| 15 | -2.6636490  | -13.3031590 | -7.8464380  | 15 | -10.2783334 | -9.063582  | -7.327506  |
| 1  | -7.3581460  | 6.2142750   | 7.6283920   | 1  | -1.5724670  | 9.184983   | 7.114470   |
| 1  | 11.0741790  | 3.9224000   | -4.1036710  | 1  | 11.7508761  | -3.170851  | -4.152713  |
| 6  | -6.2858890  | -11.8254160 | -9.5390710  | 6  | -11.2887448 | -5.106954  | -9.469253  |
| 1  | -7.3355680  | -12.1061090 | -9.7554530  | 1  | -12.1952657 | -4.636509  | -9.848462  |
| 1  | -6.0921470  | -10.7616760 | -9.7675470  | 1  | -10.5050082 | -4.361246  | -9.396341  |
| 1  | -5.5850770  | -12.4110400 | -10.1574710 | 1  | -10.9490302 | -5.867268  | -10.166303 |
| 6  | -7.2391310  | -11.1318670 | -6.8872090  | 6  | -12.3371378 | -4.392269  | -6.989713  |
| 1  | -7.1627080  | -11.3544700 | -5.8081440  | 1  | -12.3409460 | -4.529635  | -5.913385  |
| 1  | -7.0799980  | -10.0555640 | -7.0764990  | 1  | -11.7319401 | -3.521959  | -7.239166  |
| 1  | -8.2344650  | -11.4305530 | -7.2693570  | 1  | -13.3568488 | -4.228837  | -7.331681  |
| 6  | -6.4799620  | -13.8567830 | -7.4570250  | 6  | -13.1207627 | -6.832871  | -8.368598  |
| 1  | -6.0118280  | -14.5258260 | -8.1999080  | 1  | -12.8180752 | -7.529237  | -9.146064  |
| 1  | -6.1932400  | -14.1828960 | -6.4401950  | 1  | -13.5550669 | -7.358467  | -7.527284  |
| 1  | -7.5790870  | -13.9089920 | -7.5832710  | 1  | -13.8527847 | -6.139261  | -8.780730  |
| 6  | -2.2957270  | -14.5363450 | -6.5341180  | 6  | -11.6124309 | -9.744222  | -6.269394  |
| 1  | -3.2390600  | -14.9705240 | -6.1507680  | 1  | -12.5281828 | -9.180455  | -6.406502  |
| 1  | -1.6322340  | -15.3234970 | -6.9440630  | 1  | -11.7797737 | -10.792212 | -6.513011  |
| 1  | -1.8130270  | -14.0339960 | -5.6763480  | 1  | -11.3271086 | -9.649681  | -5.226049  |
| 6  | -3.3342740  | -14.2870470 | -9.2476560  | 6  | -10.8660954 | -9.569362  | -8.987633  |
| 1  | -4.2660950  | -14.7964310 | -8.9504530  | 1  | -11.9521517 | -9.625231  | -8.988565  |
| 1  | -3.5065630  | -13.5954220 | -10.0908800 | 1  | -10.5251655 | -8.869016  | -9.745058  |
| 1  | -2.5832160  | -15.0514190 | -9.5271990  | 1  | -10.4561816 | -10.549487 | -9.219436  |
| 6  | -1.0188190  | -12.7477810 | -8.4675420  | 6  | -8.9751189  | -10.294406 | -6.938293  |
| 1  | -0.5011160  | -13.6051370 | -8.9396670  | 1  | -9.3524560  | -11.282928 | -7.197544  |
| 1  | -1.1599370  | -11.9321350 | -9.2003430  | 1  | -8.0831373  | -10.078520 | -7.515978  |
| 1  | -0.4158110  | -12.3790860 | -7.6183390  | 1  | -8.7472272  | -10.274020 | -5.875813  |
| 6  | -7.3490360  | -12.5358520 | 5.7250090   | 6  | -12.8692963 | -6.375056  | 5.852082   |
| 1  | -7.2668780  | -11.7490540 | 4.9533200   | 1  | -12.4564208 | -5.727835  | 5.084486   |
| 1  | -7.0044550  | -13.4786050 | 5.2584290   | 1  | -13.0263244 | -7.358918  | 5.429264   |
| 1  | -8.3969510  | -12.6198520 | 6.0753150   | 1  | -13.8206747 | -5.962767  | 6.187344   |
| 6  | -2.7391880  | -13.8233920 | 8.9313390   | 6  | -9.0685244  | -8.907657  | 9.812903   |
| 1  | -2.2445090  | -14.7970620 | 9.1174880   | 1  | -8.8240001  | -9.888065  | 10.218311  |
| 1  | -2.0926420  | -12.9755590 | 9.2214220   | 1  | -8.2732254  | -8.211002  | 10.046832  |
| 1  | -3.6636600  | -13.7267060 | 9.5251450   | 1  | -9.9842403  | -8.541825  | 10.262218  |
| 6  | -7.0081130  | -10.5999800 | 7.8840580   | 6  | -11.9810117 | -4.725624  | 7.836904   |
| 1  | -6.3555110  | -10.2225870 | 8.6913940   | 1  | -11.2457894 | -4.418064  | 8.569911   |



|   |             |             |             |   |             |            |           |
|---|-------------|-------------|-------------|---|-------------|------------|-----------|
| 1 | -7.1138330  | -9.8275560  | 7.1013340   | 1 | -11.9035337 | -4.075663  | 6.966379  |
| 1 | -8.0093880  | -10.8522010 | 8.2841650   | 1 | -12.9752419 | -4.622783  | 8.266457  |
| 6 | -4.0000550  | -15.2575720 | 6.7297930   | 6 | -10.3637115 | -10.485621 | 7.947737  |
| 1 | -4.4434390  | -15.2024660 | 5.7178110   | 1 | -10.3877018 | -10.908601 | 6.950832  |
| 1 | -3.2665880  | -16.0856290 | 6.7827740   | 1 | -9.9882043  | -11.222613 | 8.657188  |
| 1 | -4.7933050  | -15.4465790 | 7.4738660   | 1 | -11.3704514 | -10.191179 | 8.224883  |
| 6 | -6.5990820  | -13.4190650 | 8.3983170   | 6 | -12.7702214 | -7.464508  | 8.439498  |
| 1 | -5.9930370  | -13.1985310 | 9.2940740   | 1 | -12.2819341 | -7.534855  | 9.404547  |
| 1 | -7.6761340  | -13.3872430 | 8.6541140   | 1 | -13.7404963 | -6.981124  | 8.547265  |
| 1 | -6.3614320  | -14.4133580 | 7.9847400   | 1 | -12.8960802 | -8.446052  | 7.992218  |
| 6 | -1.4862720  | -13.9051340 | 6.3188790   | 6 | -7.6267757  | -9.828978  | 7.633569  |
| 1 | -1.6591310  | -13.9654040 | 5.2296100   | 1 | -7.5478313  | -10.040316 | 6.572147  |
| 1 | -0.8271660  | -13.0533640 | 6.5626430   | 1 | -6.8173654  | -9.175614  | 7.948982  |
| 1 | -1.0275000  | -14.8434640 | 6.6862050   | 1 | -7.5680052  | -10.761629 | 8.192527  |
| 6 | -10.5003670 | 6.8982610   | 8.0644630   | 6 | -4.6808687  | 12.316200  | 7.597399  |
| 1 | -10.3358910 | 6.2041860   | 7.2208750   | 1 | -5.2164425  | 11.887130  | 6.751899  |
| 1 | -9.7350660  | 6.7223480   | 8.8422160   | 1 | -4.3505436  | 11.516681  | 8.252680  |
| 1 | -11.5147510 | 6.7361610   | 8.4778720   | 1 | -5.3486843  | 12.976966  | 8.146073  |
| 6 | -11.1280420 | 9.6178980   | 8.8093590   | 6 | -3.1438526  | 14.739533  | 8.092741  |
| 1 | -10.4832320 | 9.5157950   | 9.6997750   | 1 | -2.6995871  | 14.461277  | 9.040195  |
| 1 | -11.2311090 | 10.6738130  | 8.5087810   | 1 | -2.5582291  | 15.512449  | 7.602269  |
| 1 | -12.1347480 | 9.2059450   | 9.0175830   | 1 | -4.1529092  | 15.113826  | 8.261375  |
| 6 | -9.4386520  | 12.3974150  | 7.1772830   | 6 | 0.1045188   | 15.328018  | 6.642047  |
| 1 | -10.2590870 | 12.2294830  | 7.8968920   | 1 | -0.3121836  | 15.828607  | 7.512821  |
| 1 | -9.0710050  | 13.4345220  | 7.3033750   | 1 | 1.0957757   | 15.726208  | 6.439011  |
| 1 | -9.8143480  | 12.2472940  | 6.1486000   | 1 | -0.5192696  | 15.506577  | 5.770665  |
| 6 | -7.7492240  | 11.4280140  | 9.3428430   | 6 | 0.4925803   | 13.542857  | 8.795349  |
| 1 | -6.8385780  | 10.8639460  | 9.6140300   | 1 | 0.7461173   | 12.541170  | 9.129005  |
| 1 | -7.6477430  | 12.5053420  | 9.5807090   | 1 | 1.2924878   | 14.233237  | 9.058358  |
| 1 | -8.5791040  | 10.9740370  | 9.9098060   | 1 | -0.4245939  | 13.828353  | 9.297703  |
| 6 | -6.5958430  | 12.0867900  | 6.7671640   | 6 | 1.9733897   | 13.138293  | 6.485787  |
| 1 | -6.7669680  | 12.1258240  | 5.6769560   | 1 | 2.0533820   | 13.127986  | 5.404505  |
| 1 | -6.5189650  | 13.1120480  | 7.1781820   | 1 | 2.6269540   | 13.907149  | 6.896246  |
| 1 | -5.6720680  | 11.5275580  | 6.9982870   | 1 | 2.2671001   | 12.174141  | 6.892873  |
| 6 | -11.5616550 | 8.7407440   | 6.0592400   | 6 | -4.0788434  | 14.146463  | 5.581067  |
| 1 | -11.5925440 | 9.7756630   | 5.6676660   | 1 | -3.3898979  | 14.845345  | 5.115631  |
| 1 | -11.2137520 | 8.0999040   | 5.2287520   | 1 | -4.3989554  | 13.449821  | 4.814365  |
| 1 | -12.5628490 | 8.4128700   | 6.4027540   | 1 | -4.9482267  | 14.682167  | 5.960370  |
| 6 | -10.7102750 | 9.5305450   | -9.3687260  | 6 | -2.5981797  | 15.183366  | -7.745272 |
| 1 | -10.6682400 | 10.6333180  | -9.3233690  | 1 | -1.8072596  | 15.807047  | -7.337517 |
| 1 | -9.9369180  | 9.1713290   | -10.0748200 | 1 | -2.3667688  | 14.878052  | -8.758388 |
| 1 | -11.7186350 | 9.2268720   | -9.7122980  | 1 | -3.5319702  | 15.744444  | -7.743710 |
| 6 | -7.5436860  | 11.5773760  | -9.1505600  | 6 | 0.5144914   | 13.375665  | -9.110007 |
| 1 | -8.2464850  | 11.1152480  | -9.8655470  | 1 | -0.3804486  | 13.899305  | -9.426673 |
| 1 | -7.4452180  | 12.6641170  | -9.3423240  | 1 | 1.3944054   | 13.905851  | -9.473264 |
| 1 | -6.5798950  | 11.0558080  | -9.2957360  | 1 | 0.4788958   | 12.385953  | -9.554404 |
| 6 | -9.5776120  | 12.3848960  | -7.1894620  | 6 | 0.8964081   | 15.019023  | -6.870875 |
| 1 | -9.9399950  | 12.3011100  | -6.1462150  | 1 | 0.4717654   | 15.274640  | -5.904578 |

|   |             |            |            |   |            |           |           |
|---|-------------|------------|------------|---|------------|-----------|-----------|
| 1 | -9.2960440  | 13.4323010 | -7.4146280 | 1 | 1.9702715  | 15.182284 | -6.821207 |
| 1 | -10.3864070 | 12.0804200 | -7.8770410 | 1 | 0.4725182  | 15.651825 | -7.647133 |
| 6 | -11.7852380 | 9.4141890  | -6.6420560 | 6 | -3.1890725 | 14.603912 | -5.109690 |
| 1 | -11.7305550 | 8.9004100  | -5.6651410 | 1 | -3.5983602 | 13.930649 | -4.364001 |
| 1 | -11.6743080 | 10.4902810 | -6.4225900 | 1 | -2.2803076 | 15.036583 | -4.700704 |
| 1 | -12.7502410 | 9.2158770  | -7.1490630 | 1 | -3.9106371 | 15.395606 | -5.306193 |
| 6 | -10.7787360 | 7.0222550  | -7.9533050 | 6 | -4.5091291 | 13.142192 | -7.092469 |
| 1 | -10.0243100 | 6.6208420  | -8.6542580 | 1 | -4.5566165 | 12.911996 | -8.149870 |
| 1 | -10.7279390 | 6.4911080  | -6.9861970 | 1 | -4.7644062 | 12.251260 | -6.524246 |
| 1 | -11.7961420 | 6.9198190  | -8.3782320 | 1 | -5.2171924 | 13.935025 | -6.855004 |
| 6 | -6.8213710  | 12.1634920 | -6.3949690 | 6 | 2.2477150  | 12.479315 | -7.149953 |
| 1 | -5.8432210  | 11.6691380 | -6.5321070 | 1 | 2.2460653  | 11.518283 | -7.658191 |
| 1 | -6.7488260  | 13.2211670 | -6.7148420 | 1 | 2.9695996  | 13.133086 | -7.637989 |
| 1 | -7.1422470  | 12.1013590 | -5.3387350 | 1 | 2.5164646  | 12.352574 | -6.107083 |
| 6 | 13.4594460  | 4.2484950  | -9.2677530 | 6 | 14.4233275 | -5.075389 | -7.890090 |
| 1 | 12.7352850  | 3.7876580  | -9.9677310 | 1 | 14.0318634 | -5.126425 | -8.898395 |
| 1 | 13.7547040  | 5.2559610  | -9.6210890 | 1 | 15.3315758 | -4.473895 | -7.883931 |
| 1 | 14.3609280  | 3.6127120  | -9.2161950 | 1 | 14.6551727 | -6.067985 | -7.513166 |
| 6 | 11.3906360  | 5.6864330  | -7.8765810 | 6 | 13.3453510 | -2.489612 | -7.102018 |
| 1 | 10.6353590  | 5.2556490  | -8.5597890 | 1 | 12.6001248 | -2.175863 | -7.826093 |
| 1 | 10.9267740  | 5.9584970  | -6.9117260 | 1 | 13.1961680 | -1.939102 | -6.174378 |
| 1 | 11.8555960  | 6.5837580  | -8.3290280 | 1 | 14.3386141 | -2.273476 | -7.490063 |
| 6 | 13.3931650  | 0.4777540  | -9.0331500 | 6 | 11.3576763 | -7.082182 | -9.289614 |
| 1 | 12.4226940  | -0.0353990 | -9.1635450 | 1 | 10.4445150 | -6.625010 | -9.658056 |
| 1 | 13.3908150  | 1.3134760  | -9.7544600 | 1 | 12.1854542 | -6.465713 | -9.620633 |
| 1 | 14.2397990  | -0.2094820 | -9.2294710 | 1 | 11.4566145 | -8.088210 | -9.694473 |
| 6 | 13.5102600  | -0.4337720 | -6.2757670 | 6 | 9.9095245  | -8.335957 | -7.288586 |
| 1 | 14.3475130  | -1.0809080 | -6.6020650 | 1 | 10.1745152 | -9.251121 | -7.816716 |
| 1 | 13.6478410  | -0.1270040 | -5.2227450 | 1 | 9.7369257  | -8.554519 | -6.240768 |
| 1 | 12.5560030  | -0.9757570 | -6.4004490 | 1 | 9.0114321  | -7.919750 | -7.737610 |
| 6 | 13.9440320  | 5.2378090  | -6.5486490 | 6 | 14.2287682 | -4.375085 | -5.240156 |
| 1 | 14.7913310  | 4.5618150  | -6.3390420 | 1 | 14.3252695 | -5.407897 | -4.917848 |
| 1 | 14.2947350  | 6.1580800  | -7.0563350 | 1 | 15.2142370 | -3.960974 | -5.450007 |
| 1 | 13.4915280  | 5.4679120  | -5.5669360 | 1 | 13.7785503 | -3.821910 | -4.423538 |
| 6 | 15.2120140  | 1.7363150  | -7.0969130 | 6 | 12.7823636 | -8.182810 | -7.121049 |
| 1 | 15.3974600  | 2.5774770  | -7.7878980 | 1 | 13.5352998 | -7.995087 | -7.882732 |
| 1 | 15.3544360  | 2.0867060  | -6.0559620 | 1 | 13.1847590 | -7.967473 | -6.135361 |
| 1 | 15.9260930  | 0.9220020  | -7.3293900 | 1 | 12.4941438 | -9.230901 | -7.153481 |
| 6 | 11.2405500  | 5.5159200  | 8.0283300  | 6 | 11.7741559 | -2.553611 | 8.913562  |
| 1 | 10.6820420  | 4.9749920  | 8.8126810  | 1 | 10.9259732 | -3.035630 | 9.381936  |
| 1 | 11.6820270  | 6.4423560  | 8.4443260  | 1 | 12.5495436 | -2.422390 | 9.664513  |
| 1 | 10.5616060  | 5.7779810  | 7.1973470  | 1 | 11.4809545 | -1.577577 | 8.532850  |
| 6 | 13.3272140  | 5.3668990  | 5.9882790  | 6 | 13.2899450 | -2.182157 | 6.673746  |
| 1 | 12.5725650  | 5.4596810  | 5.1852390  | 1 | 12.5720074 | -1.618704 | 6.085002  |
| 1 | 13.6406660  | 6.3737180  | 6.3285390  | 1 | 13.7381906 | -1.534570 | 7.427318  |
| 1 | 14.1786550  | 4.7993000  | 5.5645950  | 1 | 14.0527030 | -2.554509 | 6.001954  |
| 6 | 13.8501310  | 4.5077010  | 8.7401080  | 6 | 13.9038110 | -4.374309 | 8.345161  |
| 1 | 13.3747150  | 4.1035980  | 9.6511870  | 1 | 13.5470923 | -4.950344 | 9.192431  |

|    |             |             |             |    |             |           |            |
|----|-------------|-------------|-------------|----|-------------|-----------|------------|
| 1  | 14.7461180  | 3.9214420   | 8.4741030   | 1  | 14.4045337  | -5.007542 | 7.619980   |
| 1  | 14.1437240  | 5.5640400   | 8.8958080   | 1  | 14.5876358  | -3.595783 | 8.681603   |
| 6  | 15.1938220  | 1.4518990   | 7.0487780   | 6  | 13.2467734  | -7.486428 | 5.717921   |
| 1  | 15.2899510  | 1.2990340   | 5.9623300   | 1  | 13.0350613  | -7.237817 | 4.683466   |
| 1  | 15.4524080  | 2.5025360   | 7.2624690   | 1  | 14.1198448  | -6.919629 | 6.020753   |
| 1  | 15.8728250  | 0.7794430   | 7.6091500   | 1  | 13.4465166  | -8.553144 | 5.808179   |
| 6  | 13.5212520  | 0.8856770   | 9.3725600   | 6  | 12.3752345  | -7.727964 | 8.360747   |
| 1  | 14.3240150  | 0.1664770   | 9.6290350   | 1  | 12.8019393  | -8.714173 | 8.178801   |
| 1  | 13.7108180  | 1.8610720   | 9.8485980   | 1  | 13.1242772  | -7.082397 | 8.804856   |
| 1  | 12.5353480  | 0.5327960   | 9.7231280   | 1  | 11.5355094  | -7.804667 | 9.041795   |
| 6  | 13.2597380  | -0.6706290  | 6.9495640   | 6  | 10.6735805  | -8.403376 | 6.226416   |
| 1  | 13.3165160  | -0.6658190  | 5.8468350   | 1  | 10.5204923  | -8.366147 | 5.151475   |
| 1  | 14.0785150  | -1.2891000  | 7.3655850   | 1  | 11.1344742  | -9.355843 | 6.484087   |
| 1  | 12.2875710  | -1.0701410  | 7.2892300   | 1  | 9.7249165   | -8.313078 | 6.745601   |
| 16 | 10.2346580  | 2.3291430   | 10.0363840  | 16 | 9.8822220   | -5.490041 | 9.064730   |
| 8  | 10.3757390  | 0.9365730   | 9.4632040   | 8  | 9.5242959   | -6.683361 | 8.335579   |
| 8  | 9.1016540   | 3.1333590   | 9.4569340   | 8  | 9.1893601   | -4.287674 | 8.656987   |
| 8  | 11.5201570  | 3.0873370   | 10.2140500  | 8  | 11.2825145  | -5.327452 | 9.362683   |
| 6  | 9.6836820   | 1.9849470   | 11.8224000  | 6  | 9.1458172   | -5.826238 | 10.776332  |
| 9  | 9.4834240   | 3.1423730   | 12.4868500  | 9  | 9.3829920   | -4.813170 | 11.617742  |
| 9  | 10.6369580  | 1.2750190   | 12.4676480  | 9  | 9.6807035   | -6.928802 | 11.314633  |
| 9  | 8.5351730   | 1.2747690   | 11.8340720  | 9  | 7.8217552   | -6.005217 | 10.725519  |
| 16 | -3.1707370  | -10.0762410 | -10.3446530 | 16 | -8.4756350  | -7.116285 | -9.661815  |
| 8  | -4.3311620  | -9.3676770  | -9.6846550  | 8  | -8.4466480  | -5.829518 | -8.998108  |
| 8  | -3.3779780  | -11.5371730 | -10.6258940 | 8  | -9.5174170  | -7.301123 | -10.634190 |
| 8  | -1.8190840  | -9.7311980  | -9.7750250  | 8  | -8.2336452  | -8.247982 | -8.789670  |
| 6  | -3.1409950  | -9.2964520  | -12.0779630 | 6  | -6.8851900  | -7.068456 | -10.672508 |
| 9  | -2.1480860  | -9.8310830  | -12.8194040 | 9  | -6.6691021  | -8.211410 | -11.325927 |
| 9  | -2.9463850  | -7.9626590  | -11.9915300 | 9  | -5.8442733  | -6.872273 | -9.849288  |
| 9  | -4.3175400  | -9.5213230  | -12.7046380 | 9  | -6.8786744  | -6.077393 | -11.566602 |
| 16 | 14.0149560  | 3.0310910   | -3.6437670  | 16 | 12.0438542  | -6.780654 | -4.009528  |
| 8  | 13.5219070  | 1.6188910   | -3.8766520  | 8  | 11.0529462  | -7.445733 | -4.832025  |
| 8  | 12.9511080  | 4.0957490   | -3.7837990  | 8  | 11.8136668  | -5.363099 | -3.827680  |
| 8  | 15.3260780  | 3.3458550   | -4.2949080  | 8  | 13.4044987  | -7.175326 | -4.242667  |
| 6  | 14.3602060  | 3.0410450   | -1.7721410  | 6  | 11.6275733  | -7.464229 | -2.301718  |
| 9  | 13.2139150  | 2.7540950   | -1.1107200  | 9  | 10.3809594  | -7.083501 | -1.967815  |
| 9  | 14.7979800  | 4.2519630   | -1.3790780  | 9  | 12.4465767  | -7.021382 | -1.349775  |
| 9  | 15.2873000  | 2.1135250   | -1.4593480  | 9  | 11.6493233  | -8.798963 | -2.276486  |
| 16 | -3.6979770  | -10.4386200 | 9.8786420   | 16 | -9.1572371  | -5.571221 | 9.604078   |
| 8  | -4.6367190  | -11.6092760 | 9.9763030   | 8  | -10.3680098 | -6.358527 | 9.595834   |
| 8  | -4.3333960  | -9.1672460  | 9.3787650   | 8  | -9.3178404  | -4.176424 | 9.291566   |
| 8  | -2.3394440  | -10.7344870 | 9.2879540   | 8  | -8.0087290  | -6.200063 | 8.981461   |
| 6  | -3.2903600  | -10.0569380 | 11.6953380  | 6  | -8.6896371  | -5.503829 | 11.433996  |
| 9  | -4.4163920  | -9.7668590  | 12.3806840  | 9  | -9.6518557  | -4.898942 | 12.133692  |
| 9  | -2.4492680  | -9.0038800  | 11.7786300  | 9  | -7.5603259  | -4.811293 | 11.604516  |
| 9  | -2.6991260  | -11.1288940 | 12.2691960  | 9  | -8.4993354  | -6.711580 | 11.983453  |
| 16 | -9.9560270  | 10.6427580  | -3.7361120  | 16 | -0.0562447  | 13.687384 | -3.826766  |
| 8  | -10.2517580 | 9.1721000   | -3.9237970  | 8  | -1.2386421  | 12.866308 | -3.668312  |

|    |             |             |             |    |             |           |            |
|----|-------------|-------------|-------------|----|-------------|-----------|------------|
| 8  | -10.9452680 | 11.5790470  | -4.3577920  | 8  | -0.2955019  | 15.091194 | -4.010097  |
| 8  | -8.5075480  | 11.0245800  | -3.9530050  | 8  | 0.9571389   | 13.107093 | -4.686699  |
| 6  | -10.1610840 | 10.8545380  | -1.8556770  | 6  | 0.7565312   | 13.537303 | -2.136396  |
| 9  | -11.4214700 | 10.5649620  | -1.4821600  | 9  | -0.0116799  | 14.006350 | -1.158015  |
| 9  | -9.8707290  | 12.1182030  | -1.4850260  | 9  | 1.9312830   | 14.166259 | -2.087029  |
| 9  | -9.3121710  | 10.0088090  | -1.2242310  | 9  | 0.9888039   | 12.237322 | -1.880068  |
| 16 | 10.3200100  | 2.1229980   | -10.1569940 | 16 | 10.7339801  | -3.576180 | -9.161512  |
| 8  | 10.2459540  | 0.8392900   | -9.3657570  | 8  | 9.6342786   | -4.449216 | -8.800801  |
| 8  | 11.5760480  | 2.3169710   | -10.9504790 | 8  | 12.0439942  | -4.188787 | -9.116965  |
| 8  | 9.8489470   | 3.3524270   | -9.4130800  | 8  | 10.6618015  | -2.239886 | -8.636603  |
| 6  | 8.9605850   | 1.8835090   | -11.4646980 | 6  | 10.4664387  | -3.367488 | -11.017020 |
| 9  | 8.8866820   | 2.9605660   | -12.2741120 | 9  | 11.4126697  | -2.610849 | -11.578073 |
| 9  | 7.7620020   | 1.7189180   | -10.8552810 | 9  | 9.2830517   | -2.812311 | -11.292211 |
| 9  | 9.2140620   | 0.7920870   | -12.2161970 | 9  | 10.4978518  | -4.563184 | -11.620943 |
| 16 | 14.0359210  | 2.4429220   | 3.6967930   | 16 | 12.8286754  | -4.386893 | 4.230212   |
| 8  | 12.8080680  | 3.2232840   | 3.3078300   | 8  | 12.3419424  | -3.035546 | 4.142676   |
| 8  | 13.7481190  | 1.0519120   | 4.2251100   | 8  | 11.8639115  | -5.405087 | 3.862832   |
| 8  | 15.0746810  | 3.2023350   | 4.4662690   | 8  | 13.6517428  | -4.695673 | 5.375081   |
| 6  | 14.8516250  | 2.0789330   | 2.0183220   | 6  | 14.0680099  | -4.490713 | 2.805806   |
| 9  | 14.0199480  | 1.3289540   | 1.2612590   | 9  | 13.5016596  | -4.168941 | 1.638368   |
| 9  | 16.0065900  | 1.4025880   | 2.1912090   | 9  | 14.5684326  | -5.725364 | 2.689868   |
| 9  | 15.1153370  | 3.2309010   | 1.3673640   | 9  | 15.0979073  | -3.657020 | 2.995673   |
| 16 | -7.3306330  | 7.8801010   | 10.1049840  | 16 | -1.9100202  | 10.897802 | 9.161977   |
| 8  | -8.6244480  | 8.6154660   | 10.3121250  | 8  | -2.2212080  | 12.311159 | 9.168283   |
| 8  | -6.2043360  | 8.6921650   | 9.5088510   | 8  | -0.6327360  | 10.556092 | 8.568753   |
| 8  | -7.4817580  | 6.4973200   | 9.5250010   | 8  | -3.0020290  | 10.026885 | 8.822475   |
| 6  | -6.7212400  | 7.5617550   | 11.8770650  | 6  | -1.5878259  | 10.566426 | 10.990038  |
| 9  | -5.5625010  | 6.8680650   | 11.8600410  | 9  | -1.2610870  | 9.291875  | 11.218985  |
| 9  | -7.6379740  | 6.8552840   | 12.5713300  | 9  | -2.6478057  | 10.859338 | 11.746924  |
| 9  | -6.5112650  | 8.7376280   | 12.5102010  | 9  | -0.5681723  | 11.324257 | 11.415798  |
| 16 | -9.6081000  | 10.8522340  | 3.6974560   | 16 | -1.1417286  | 13.849354 | 3.741620   |
| 8  | -10.7802130 | 11.4212320  | 4.4438750   | 8  | -1.6241212  | 15.164231 | 4.062963   |
| 8  | -9.6871480  | 9.3791660   | 3.3967790   | 8  | -2.1304768  | 12.789244 | 3.774663   |
| 8  | -8.2601540  | 11.3237710  | 4.1995310   | 8  | 0.1295230   | 13.491944 | 4.339689   |
| 6  | -9.6967490  | 11.6425150  | 1.9692200   | 6  | -0.7236020  | 13.922597 | 1.907672   |
| 9  | -10.8155940 | 11.2477410  | 1.3283730   | 9  | -1.7991907  | 14.219349 | 1.178400   |
| 9  | -8.6199890  | 11.2597940  | 1.2456490   | 9  | -0.2852030  | 12.716720 | 1.511749   |
| 9  | -9.6982880  | 12.9878460  | 2.0626200   | 9  | 0.2301638   | 14.811001 | 1.642348   |
| 16 | -7.2241100  | 8.1218820   | -10.2800950 | 16 | -1.9137410  | 11.402742 | -9.561675  |
| 8  | -8.0253840  | 7.0910510   | -9.5156340  | 8  | -1.1530322  | 10.576308 | -8.642412  |
| 8  | -6.1078270  | 8.7654210   | -9.4929100  | 8  | -1.3705330  | 11.517264 | -10.879766 |
| 8  | -8.0460820  | 9.0579220   | -11.1114310 | 8  | -2.4230521  | 12.626974 | -8.976612  |
| 6  | -6.2798450  | 7.0505590   | -11.5350610 | 6  | -3.4945905  | 10.402682 | -9.797396  |
| 9  | -5.5272300  | 6.1364740   | -10.8748850 | 9  | -3.2522764  | 9.146672  | -10.178070 |
| 9  | -5.4640970  | 7.8106430   | -12.2942140 | 9  | -4.3021757  | 10.962608 | -10.698149 |
| 9  | -7.1391680  | 6.3952400   | -12.3426720 | 9  | -4.1826065  | 10.335318 | -8.641948  |
| 16 | -4.8477980  | -13.6011930 | -4.0130420  | 16 | -11.7634568 | -6.669159 | -4.416352  |
| 8  | -5.7804040  | -12.4805590 | -4.4221480  | 8  | -11.5721343 | -5.273308 | -4.118777  |

|    |            |             |            |    |             |            |           |
|----|------------|-------------|------------|----|-------------|------------|-----------|
| 8  | -3.4233940 | -13.1767690 | -3.7697320 | 8  | -10.6012695 | -7.510347  | -4.213707 |
| 8  | -5.0150590 | -14.8657130 | -4.8050960 | 8  | -12.5226503 | -6.951288  | -5.613620 |
| 6  | -5.4637210 | -14.0298210 | -2.2640550 | 6  | -12.9185154 | -7.269347  | -3.053637 |
| 9  | -5.4284980 | -12.9193590 | -1.4940850 | 9  | -12.3863384 | -7.069552  | -1.844504 |
| 9  | -4.6761670 | -14.9742290 | -1.7101720 | 9  | -13.1498842 | -8.580775  | -3.183491 |
| 9  | -6.7312790 | -14.4877330 | -2.3072590 | 9  | -14.0991783 | -6.646221  | -3.087173 |
| 16 | -4.7661150 | -13.6943590 | 3.3065820  | 16 | -10.6792337 | -8.946095  | 4.993846  |
| 8  | -3.3221230 | -13.6493870 | 3.7572070  | 8  | -9.3980272  | -9.535691  | 5.308735  |
| 8  | -5.3916290 | -12.3471220 | 3.0611020  | 8  | -10.6131306 | -7.724331  | 4.226189  |
| 8  | -5.6218700 | -14.6706700 | 4.0638020  | 8  | -11.6767271 | -8.987262  | 6.029376  |
| 6  | -4.6327390 | -14.4251500 | 1.5545640  | 6  | -11.3614020 | -10.179365 | 3.726189  |
| 9  | -3.8323080 | -13.6398010 | 0.8012120  | 9  | -10.5699977 | -10.264539 | 2.649807  |
| 9  | -5.8525480 | -14.4881570 | 0.9822640  | 9  | -12.5833140 | -9.839531  | 3.303422  |
| 9  | -4.1067110 | -15.6659720 | 1.5998040  | 9  | -11.4468275 | -11.406241 | 4.256914  |
| 6  | -0.9664970 | 2.2371010   | -2.4950790 | 21 | 1.4561056   | -1.087815  | -0.713576 |
| 6  | -2.1150020 | 1.9685200   | -1.6302570 | 21 | -1.1405014  | 0.634297   | -1.135850 |
| 6  | -0.4195040 | 1.2040920   | -3.2886140 | 21 | -0.8459100  | 0.448225   | 2.030769  |
| 6  | -2.6788670 | 0.6822200   | -1.5951770 | 7  | -0.0799162  | -0.068314  | 0.195678  |
| 6  | -3.0796590 | 0.1110830   | -0.3144660 | 6  | 0.2064325   | -0.174111  | 4.318018  |
| 6  | -3.0133690 | 0.8622710   | 0.9034070  | 6  | 0.0461979   | 1.230689   | 4.133046  |
| 6  | -2.9131490 | 0.1024410   | 2.1122870  | 6  | 1.1721921   | 1.913930   | 3.596730  |
| 6  | 1.8838160  | 1.9376360   | -2.6920700 | 6  | 2.2900316   | -0.963763  | -3.034870 |
| 6  | 1.3098640  | 2.9932030   | -1.8588570 | 6  | -0.8868311  | -1.085582  | 4.109180  |
| 6  | 1.0341870  | 1.0519420   | -3.3893930 | 6  | -2.8847755  | -1.475924  | 2.818750  |
| 6  | -0.0840350 | 3.1454030   | -1.7644280 | 6  | -2.1738396  | -0.622435  | 3.709196  |
| 6  | -0.6943810 | 3.4441870   | -0.4707970 | 6  | -2.3718630  | 0.797998   | 3.618124  |
| 6  | 0.1001600  | 3.6706250   | 0.7002180  | 6  | -1.3879443  | 2.768032   | 2.850269  |
| 6  | -0.5284770 | 3.4340130   | 1.9660770  | 6  | -0.2610068  | 3.423518   | 2.268360  |
| 6  | -2.4299540 | 2.2192740   | 0.8679720  | 6  | 1.0248837   | 3.016660   | 2.690920  |
| 6  | -1.9491620 | 2.7206350   | -0.3880510 | 6  | -0.3823991  | 3.908777   | 0.942315  |
| 6  | -1.7841870 | 2.7128150   | 2.0507380  | 6  | -2.5535019  | 2.524495   | 2.060605  |
| 6  | 2.4815900  | -0.8682630  | -2.7434310 | 6  | -3.3917533  | 2.149351   | -0.190530 |
| 6  | 3.3537070  | 0.0533660   | -2.0126960 | 6  | -2.6452337  | 2.952485   | 0.707540  |
| 6  | 1.3396570  | -0.3816960  | -3.4157460 | 6  | -1.5652633  | 3.683857   | 0.172067  |
| 6  | 3.0609200  | 1.4267130   | -1.9874150 | 6  | -3.7109404  | -0.946854  | 1.774602  |
| 6  | 3.2167980  | 2.1733680   | -0.7415560 | 6  | -3.7907684  | 0.445545   | 1.575959  |
| 6  | 3.7576510  | 1.5688280   | 0.4419180  | 6  | -3.1391531  | 1.300297   | 2.511204  |
| 6  | 3.3830740  | 2.1623240   | 1.6933750  | 6  | -3.9354801  | 0.904091   | 0.241092  |
| 6  | 1.5621230  | 3.4956260   | 0.5991580  | 6  | 3.8915774   | -0.189755  | 1.347350  |
| 6  | 2.1306740  | 3.1292920   | -0.6610870 | 6  | 3.6968550   | 1.198402   | 1.158293  |
| 6  | 2.2937270  | 3.1122510   | 1.7660760  | 6  | 2.1356717   | 3.011908   | 1.795274  |
| 6  | 0.0019480  | -2.3084890  | -2.5776230 | 6  | 2.9772715   | 1.911485   | 2.144160  |
| 6  | 1.1831980  | -2.8034650  | -1.8725040 | 6  | 3.3082581   | -0.865908  | 2.461112  |
| 6  | 0.0744880  | -1.1159390  | -3.3315190 | 6  | 1.4155304   | -0.854518  | 3.973684  |
| 6  | 2.3940990  | -2.0941530  | -1.9515110 | 6  | 2.5177368   | -0.169307  | 3.406650  |
| 6  | 3.2075700  | -1.9250080  | -0.7531820 | 6  | 2.3820068   | 1.232153   | 3.250182  |
| 6  | 2.8455200  | -2.5339670  | 0.4889860  | 6  | 1.1271515   | -3.702822  | 1.686507  |
| 6  | 3.3660520  | -1.9271740  | 1.6738790  | 6  | 1.8311165   | -2.849549  | 2.568542  |

|   |            |            |            |   |            |           |           |
|---|------------|------------|------------|---|------------|-----------|-----------|
| 6 | 4.0654360  | 0.1235850  | 0.4154770  | 6 | 2.9684980  | -2.188815 | 2.042808  |
| 6 | 3.8100480  | -0.6073710 | -0.7926940 | 6 | 1.0791517  | -2.182278 | 3.562904  |
| 6 | 3.9741360  | -0.6141690 | 1.6427970  | 6 | -2.1848258 | -3.191210 | -1.300122 |
| 6 | -2.1285870 | -0.3887780 | -2.4270750 | 6 | -3.7606994 | -1.391238 | -0.666514 |
| 6 | -2.1889840 | -1.6192830 | -1.6370710 | 6 | -3.0298655 | -2.096013 | -1.651376 |
| 6 | -1.0130220 | -0.1358260 | -3.2543670 | 6 | -3.9391383 | 0.001519  | -0.867060 |
| 6 | -1.1501040 | -2.5621130 | -1.7127110 | 6 | -1.0684519 | -3.186452 | -2.193100 |
| 6 | -0.6832100 | -3.2243880 | -0.4964740 | 6 | 1.3613205  | -2.964403 | -2.339892 |
| 6 | -1.3167670 | -3.0051790 | 0.7726760  | 6 | 0.2164895  | -3.598169 | -1.769715 |
| 6 | -0.5170880 | -3.2335920 | 1.9423970  | 6 | 0.3256420  | -4.075961 | -0.444710 |
| 6 | 1.5838060  | -3.2943590 | 0.5728740  | 6 | -0.2672956 | 0.002116  | -3.823513 |
| 6 | 0.7570900  | -3.3707870 | -0.5952040 | 6 | -0.1068228 | -1.386324 | -3.588629 |
| 6 | 0.9226190  | -3.3779980 | 1.8421730  | 6 | -1.2272828 | -2.089670 | -3.095779 |
| 6 | -2.4028660 | -2.0064350 | 0.8510930  | 6 | 1.1862257  | -1.852496 | -3.220763 |
| 6 | -2.7780310 | -1.3050630 | -0.3401980 | 6 | -3.3969728 | 0.690211  | -2.000339 |
| 6 | -2.6120920 | -1.3150490 | 2.0869990  | 6 | -2.5929716 | -0.012217 | -2.955205 |
| 6 | 0.4445240  | -2.3333360 | 3.9187440  | 6 | -2.4414541 | -1.412229 | -2.764118 |
| 6 | -0.8139850 | -2.5811710 | 3.2159600  | 6 | -1.4882133 | 0.687356  | -3.533591 |
| 6 | -1.8518990 | -1.6375350 | 3.2884590  | 6 | -3.0557579 | 2.033194  | -1.577409 |
| 6 | 0.6201550  | -1.1453640 | 4.6634650  | 6 | -1.1868326 | 3.543196  | -1.202170 |
| 6 | 2.9242710  | -0.8893810 | 3.7549720  | 6 | -1.9050305 | 2.705120  | -2.100132 |
| 6 | 2.7237480  | -2.1044490 | 2.9695350  | 6 | -1.1476899 | 2.029466  | -3.109827 |
| 6 | 1.5176210  | -2.8191220 | 3.0536440  | 6 | 2.5970602  | -2.790187 | -1.622229 |
| 6 | 1.8857660  | -0.4106520 | 4.5820870  | 6 | 2.6354505  | -3.168658 | -0.235469 |
| 6 | 2.3275220  | 1.9128300  | 3.8064020  | 6 | 1.5174257  | -3.852136 | 0.315424  |
| 6 | 3.3990590  | 1.4090720  | 2.9450240  | 6 | 3.3555536  | -2.338814 | 0.672453  |
| 6 | 3.6915420  | 0.0366470  | 2.9201380  | 6 | -0.2877523 | -3.854043 | 1.769065  |
| 6 | 1.5802180  | 1.0229990  | 4.6077900  | 6 | -1.0475895 | -3.139585 | 2.723969  |
| 6 | -0.5236970 | 2.2127610  | 4.0005160  | 6 | -0.3407335 | -2.321740 | 3.638633  |
| 6 | 0.2515900  | 3.1239060  | 3.1616630  | 6 | -2.3415523 | -2.711901 | 2.343803  |
| 6 | 1.6434760  | 2.9669090  | 3.0619750  | 6 | -0.7848258 | -4.086347 | 0.448588  |
| 6 | 0.1259210  | 1.1749010  | 4.7055620  | 6 | -3.6835618 | -1.855629 | 0.669485  |
| 6 | -1.6841480 | -0.4122780 | 4.0710690  | 6 | -2.0531547 | -3.608751 | 0.045657  |
| 6 | -2.3421130 | 0.6645900  | 3.3299520  | 6 | -2.8378954 | -2.947126 | 1.022577  |
| 6 | -1.7797430 | 1.9513110  | 3.2982070  | 6 | 3.1805945  | -1.535262 | -2.060084 |
| 6 | -0.4665950 | -0.1651160 | 4.7416300  | 6 | 3.6560263  | 0.749343  | -1.288360 |
|   |            |            |            | 6 | 3.8039334  | -0.653624 | -1.112892 |
|   |            |            |            | 6 | 3.9282430  | -1.094536 | 0.238377  |
|   |            |            |            | 6 | 0.8171383  | 0.901443  | -3.594797 |
|   |            |            |            | 6 | 2.8273257  | 1.297492  | -2.319882 |
|   |            |            |            | 6 | 2.0888846  | 0.441687  | -3.167216 |
|   |            |            |            | 6 | -1.2689206 | 1.718344  | 3.826800  |
|   |            |            |            | 6 | 0.2349899  | 3.682718  | -1.274757 |
|   |            |            |            | 6 | 2.2829551  | 2.532881  | -1.849925 |
|   |            |            |            | 6 | 0.9899285  | 2.962154  | -2.230394 |
|   |            |            |            | 6 | 0.2786118  | 2.147919  | -3.147800 |
|   |            |            |            | 6 | 0.7292817  | 3.912413  | 0.046679  |
|   |            |            |            | 6 | 3.6056137  | 1.652060  | -0.178035 |

|   |           |          |           |
|---|-----------|----------|-----------|
| 6 | 1.9914799 | 3.422233 | 0.450097  |
| 6 | 2.7671077 | 2.750582 | -0.526059 |

**Pt<sub>6</sub>PBI<sub>3</sub>⊃Sc<sub>3</sub>CH@C<sub>80</sub>**

Gas-phase. BLYP-D3(BJ)/def2-SVP

| Atom | X          | Y          | Z          |
|------|------------|------------|------------|
| 21   | 1.7439920  | 0.2313130  | -0.1390030 |
| 21   | -0.8019210 | 0.3337340  | 2.3903440  |
| 21   | -1.0414520 | -1.9740930 | -0.3332800 |
| 6    | -0.2636580 | -0.1499470 | 0.4011840  |
| 1    | -0.8263930 | 0.6099380  | -0.2083970 |
| 6    | 2.1454670  | 2.9275600  | 1.8092220  |
| 6    | 1.8716480  | 3.2947760  | 0.4482680  |
| 6    | 2.5907340  | 2.5656760  | -0.5864110 |
| 6    | 0.1467510  | -4.3061940 | -0.1391040 |
| 6    | 1.1061580  | 2.9587130  | 2.8129850  |
| 6    | -1.3138200 | 2.6676720  | 3.1685160  |
| 6    | -0.2319560 | 3.3545360  | 2.4690640  |
| 6    | -0.4810430 | 3.8181190  | 1.1347500  |
| 6    | -0.0473280 | 3.5142570  | -1.1637380 |
| 6    | 0.6237670  | 2.7376010  | -2.1659010 |
| 6    | 1.9616530  | 2.2851480  | -1.8547060 |
| 6    | -0.1547580 | 1.9004400  | -3.0312360 |
| 6    | -1.4737780 | 3.3716460  | -0.9570530 |
| 6    | -3.3522920 | 1.7824070  | -1.1155260 |
| 6    | -2.2441940 | 2.4452920  | -1.7491210 |
| 6    | -1.5819750 | 1.7554650  | -2.8256480 |
| 6    | -2.5408760 | 2.3759730  | 2.4653440  |
| 6    | -2.7733740 | 2.7964850  | 1.1016320  |
| 6    | -1.7402700 | 3.5496680  | 0.4592070  |
| 6    | -3.6011150 | 1.9508080  | 0.3002370  |
| 6    | 3.8412970  | -1.2857040 | 0.1672380  |
| 6    | 3.6245140  | -0.8638610 | -1.2000270 |
| 6    | 2.5136560  | 1.0520330  | -2.3723090 |
| 6    | 3.5544780  | 0.5799880  | -1.4537870 |
| 6    | 3.8983300  | -0.3327080 | 1.2756660  |
| 6    | 3.0249210  | 1.8035920  | 2.0995550  |
| 6    | 3.7207110  | 1.0794170  | 1.0611470  |
| 6    | 3.5883580  | 1.5362130  | -0.3214350 |
| 6    | 1.6249260  | -0.9594240 | 4.1736330  |
| 6    | 2.6794730  | -0.2709440 | 3.4782680  |
| 6    | 3.4083110  | -0.9976170 | 2.4717350  |
| 6    | 2.5289560  | 1.1434590  | 3.2948000  |
| 6    | -2.8386910 | -1.6313200 | 3.3838580  |
| 6    | -3.8909920 | 0.2798220  | 2.1548820  |
| 6    | -3.7952350 | -1.1310370 | 2.4005610  |
| 6    | -4.1484570 | 0.7133670  | 0.8181860  |
| 6    | -2.3157630 | -2.8934740 | 2.8862610  |
| 6    | -0.2864140 | -4.0536860 | 2.1561960  |
| 6    | -0.9713210 | -3.3046310 | 3.1709240  |
| 6    | -0.1772110 | -2.4631870 | 4.0260000  |
| 6    | -2.5482180 | -3.5865460 | -0.8492670 |
| 6    | -2.2543620 | -3.9000950 | 0.5551020  |
| 6    | -2.9427330 | -3.1719720 | 1.6000960  |
| 6    | -0.9067360 | -4.3010390 | 0.8666790  |

**Pt<sub>6</sub>PBI<sub>3</sub>⊃Sc<sub>4</sub>O<sub>3</sub>@C<sub>80</sub>**

Gas-phase. BLYP-D3(BJ)/def2-SVP

| Atom | X          | Y          | Z          |
|------|------------|------------|------------|
| 21   | -1.3723410 | -1.3356340 | -0.5539350 |
| 21   | -0.6722550 | 1.4101860  | 0.4407070  |
| 21   | 0.3089760  | -0.7380590 | 2.3481100  |
| 21   | 1.8231440  | 0.1235550  | -0.5512570 |
| 8    | -0.1159040 | 0.1312790  | -1.0416920 |
| 8    | -1.2681320 | -0.3968340 | 1.1958400  |
| 8    | 1.0501640  | 0.6790710  | 1.1809700  |
| 6    | 0.1997470  | -4.1827950 | -0.0313730 |
| 6    | 0.2817440  | -3.7784450 | -1.4018870 |
| 6    | -0.9475170 | -3.3419960 | -2.0323070 |
| 6    | -2.6141030 | 2.7121820  | 1.7710970  |
| 6    | 1.2977690  | -3.9897820 | 0.8844630  |
| 6    | 3.1950190  | -2.5322920 | 1.4056570  |
| 6    | 2.5076290  | -3.3549680 | 0.4513050  |
| 6    | 2.6194080  | -3.0095150 | -0.9401800 |
| 6    | 1.5496520  | -2.1699380 | -2.8636710 |
| 6    | 0.3341080  | -1.6485720 | -3.4312350 |
| 6    | -0.9148990 | -2.2720040 | -3.0106240 |
| 6    | 0.3026250  | -0.2584690 | -3.7835300 |
| 6    | 2.6806090  | -1.2985090 | -2.5635170 |
| 6    | 3.3945870  | 0.9875090  | -1.9285370 |
| 6    | 2.6501780  | 0.1161770  | -2.8603050 |
| 6    | 1.4391910  | 0.6174090  | -3.4851070 |
| 6    | 3.9291240  | -1.3481880 | 0.9985750  |
| 6    | 4.0201310  | -0.9664890 | -0.4001560 |
| 6    | 3.3367590  | -1.8161200 | -1.3566880 |
| 6    | 4.0841640  | 0.4552700  | -0.7177760 |
| 6    | -3.8832930 | -1.7219680 | 0.4490230  |
| 6    | -3.7712120 | -1.3364480 | -0.9508630 |
| 6    | -2.1551460 | -1.5334700 | -2.9041970 |
| 6    | -2.9988130 | -2.1788970 | -1.8725040 |
| 6    | -3.1288720 | -2.8546250 | 0.9733350  |
| 6    | -1.0446770 | -4.1054380 | 0.7155970  |
| 6    | -2.2585130 | -3.6172020 | 0.1110160  |
| 6    | -2.2327390 | -3.3165500 | -1.3293250 |
| 6    | -0.8945840 | -2.2146780 | 3.9518880  |
| 6    | -1.5580210 | -3.0384100 | 2.9425280  |
| 6    | -2.7965480 | -2.5754580 | 2.3723010  |
| 6    | -0.7089890 | -3.8361680 | 2.1052760  |
| 6    | 2.1666440  | 1.2573580  | 3.7601370  |
| 6    | 3.7556760  | 1.0292860  | 1.7943550  |
| 6    | 2.9472530  | 1.8418070  | 2.6661220  |
| 6    | 3.8570570  | 1.4014500  | 0.3813800  |
| 6    | 0.9261430  | 2.0264930  | 3.8886900  |
| 6    | -1.5520990 | 1.8843120  | 3.6962980  |
| 6    | -0.3195900 | 1.3900840  | 4.2553090  |
| 6    | -0.2875950 | -0.0303810 | 4.5792210  |
| 6    | -0.1930690 | 3.9369550  | 0.8722920  |
| 6    | -0.2629810 | 3.5124150  | 2.2568590  |

|   |            |            |            |   |            |            |            |
|---|------------|------------|------------|---|------------|------------|------------|
| 6 | -4.2345090 | -0.2335800 | -0.2847100 | 6 | 0.9566800  | 3.0871500  | 2.8976780  |
| 6 | -4.0365020 | -1.6308950 | -0.0544800 | 6 | -1.5097580 | 2.9335340  | 2.6959890  |
| 6 | -3.8612480 | -2.0758220 | 1.3057030  | 6 | 3.0677010  | 2.4917140  | -0.1252220 |
| 6 | -3.3598360 | -2.3936220 | -1.1018960 | 6 | 2.2288780  | 3.2901010  | 0.7357690  |
| 6 | -3.7335830 | 0.4320160  | -1.4789570 | 6 | 2.1954270  | 2.9699840  | 2.1368210  |
| 6 | -1.9531450 | 0.3990200  | -3.1826130 | 6 | 1.0412220  | 3.8161130  | 0.1197510  |
| 6 | -2.9968080 | -0.2848480 | -2.4757670 | 6 | 2.7543060  | 2.2320570  | -1.5218930 |
| 6 | -2.8270070 | -1.7071250 | -2.2613350 | 6 | 0.8931120  | 1.9308290  | -3.1385880 |
| 6 | 1.1372860  | -3.9034250 | 1.9425530  | 6 | 1.5253060  | 2.7270660  | -2.1225190 |
| 6 | 1.9210740  | -3.0024120 | 2.7425320  | 6 | 0.6966030  | 3.5390990  | -1.2692890 |
| 6 | 1.2478200  | -2.3082020 | 3.8102560  | 6 | -2.6912250 | 1.0161340  | 3.3947290  |
| 6 | 3.0320080  | -2.3453460 | 2.1042510  | 6 | -2.6416770 | -0.4014190 | 3.6338730  |
| 6 | 0.4235510  | -0.2564250 | 4.6017790  | 6 | -1.4198310 | -0.8997100 | 4.2500570  |
| 6 | 0.2515400  | 1.1668080  | 4.4157300  | 6 | -3.3403590 | -1.2738330 | 2.7132770  |
| 6 | 1.3344500  | 1.8500140  | 3.7390890  | 6 | 0.5700720  | -2.1787350 | 4.1194300  |
| 6 | -1.1174490 | 1.6540600  | 4.2087920  | 6 | 1.3966300  | -2.8973870 | 3.1567120  |
| 6 | -0.6975040 | -1.1932600 | 4.5079310  | 6 | 0.7436600  | -3.7615510 | 2.2064280  |
| 6 | -3.0990010 | 1.1587060  | 3.0059410  | 6 | 2.6378580  | -2.2925500 | 2.7268180  |
| 6 | -2.0392570 | -0.7487120 | 4.2107210  | 6 | 0.9508920  | -0.8095300 | 4.5292230  |
| 6 | -2.2527970 | 0.6988380  | 4.1052580  | 6 | 3.8306300  | -0.3715930 | 2.0814160  |
| 6 | 1.4102440  | -4.0790380 | 0.5330820  | 6 | 2.1726550  | -0.1656950 | 4.0061150  |
| 6 | 2.2602270  | -2.9858980 | -1.4891580 | 6 | 3.0320880  | -0.9574010 | 3.1497850  |
| 6 | 2.4717170  | -3.3718750 | -0.1226810 | 6 | -3.3400030 | 1.5280850  | 2.2028040  |
| 6 | 3.3068250  | -2.5325060 | 0.6921330  | 6 | -3.8810850 | 1.0458400  | -0.1512210 |
| 6 | -1.4678310 | -3.5986950 | -1.8723170 | 6 | -3.9541120 | 0.6548020  | 1.2339260  |
| 6 | 1.0027730  | -3.2513440 | -2.1712310 | 6 | -4.0102930 | -0.7474670 | 1.5287440  |
| 6 | -0.0896580 | -3.9256800 | -1.5045370 | 6 | -1.3066070 | 3.7408180  | -0.0511060 |
| 6 | 0.5718950  | 3.7929630  | 0.1249870  | 6 | -3.1817980 | 2.2404660  | -0.5750630 |
| 6 | -0.7538100 | -0.2991360 | -3.6171670 | 6 | -2.5238260 | 3.0904290  | 0.3828860  |
| 6 | 0.7716650  | -2.1682760 | -3.1216650 | 6 | 1.5222790  | -3.2208470 | -1.8656000 |
| 6 | -0.5660520 | -1.6960840 | -3.3677650 | 6 | -0.5580190 | 1.8614670  | -3.2375720 |
| 6 | -1.6559690 | -2.4208160 | -2.7191900 | 6 | -2.6502050 | 2.0226730  | -1.9188870 |
| 6 | 0.3636240  | 0.6347330  | -3.5275000 | 6 | -1.3921100 | 2.6024630  | -2.3273940 |
| 6 | 2.8054710  | -1.7410450 | -2.0111800 | 6 | -0.7473310 | 3.4797400  | -1.3737320 |
| 6 | 1.6746730  | 0.1737340  | -3.1826980 | 6 | -0.9284680 | 0.5092180  | -3.6433210 |
| 6 | 1.8786030  | -1.2412000 | -3.0256230 | 6 | -3.7820070 | 0.0798570  | -1.2291690 |
| 7 | 9.8274100  | -3.3283430 | 6.2759980  | 6 | -2.1502210 | -0.0988560 | -3.1675080 |
| 6 | 10.2274160 | -3.0803600 | 4.9994150  | 6 | -3.0213580 | 0.6868850  | -2.3284040 |
| 6 | 8.8467400  | -2.5735960 | 6.8451860  | 7 | 10.1301630 | -3.3357150 | 5.4923050  |
| 6 | 9.6410760  | -2.0664900 | 4.2372820  | 6 | 10.3456700 | -3.2259690 | 4.1534320  |
| 1 | 11.0505610 | -3.7001260 | 4.6034550  | 6 | 9.3238070  | -2.4430010 | 6.1317790  |
| 6 | 8.2246590  | -1.5383100 | 6.1419020  | 6 | 9.7571620  | -2.2040520 | 3.4027420  |
| 1 | 8.5653620  | -2.8365030 | 7.8797060  | 1 | 11.0239920 | -3.9654650 | 3.6928510  |
| 6 | 8.6110370  | -1.2694340 | 4.8001860  | 6 | 8.7049100  | -1.3976940 | 5.4416560  |
| 1 | 9.9876330  | -1.8951670 | 3.2104740  | 1 | 9.1837090  | -2.5942530 | 7.2164360  |
| 1 | 7.4376750  | -0.9390700 | 6.6169050  | 6 | 8.9146280  | -1.2587790 | 4.0419570  |
| 6 | 7.9701180  | -0.2248290 | 4.0774440  | 1 | 9.9580390  | -2.1432150 | 2.3258050  |
| 6 | 7.3310560  | 0.7192490  | 3.6157060  | 1 | 8.0567700  | -0.6878810 | 5.9710630  |
| 6 | 6.6656810  | 1.7976280  | 2.9709330  | 6 | 8.2808770  | -0.1895660 | 3.3493480  |
| 6 | 6.8728210  | 1.9447600  | 1.5691010  | 6 | 7.6477780  | 0.7901010  | 2.9587830  |
| 6 | 5.8004670  | 2.7008730  | 3.6452170  | 6 | 6.9555370  | 1.8982670  | 2.4001130  |
| 6 | 6.2348380  | 2.9334990  | 0.8141350  | 6 | 7.0617230  | 2.0903280  | 0.9940920  |
| 1 | 7.5157900  | 1.2011760  | 1.0878380  | 6 | 6.1306260  | 2.7699070  | 3.1617100  |
| 6 | 5.4555500  | 2.4654660  | 5.0768800  | 6 | 6.3555090  | 3.0891050  | 0.3174360  |
| 6 | 5.2212000  | 3.7906210  | 2.9213820  | 1 | 7.6740160  | 1.3676580  | 0.4458680  |
| 6 | 5.4216740  | 3.9011740  | 1.4958810  | 6 | 5.8772420  | 2.4777370  | 4.6021060  |



|   |           |            |            |   |           |            |            |
|---|-----------|------------|------------|---|-----------|------------|------------|
| 8 | 5.8693750 | 1.4970970  | 5.7157830  | 6 | 5.4907740 | 3.8738410  | 2.5148050  |
| 7 | 4.5874750 | 3.4069720  | 5.6741430  | 6 | 5.5969870 | 4.0366640  | 1.0848120  |
| 6 | 4.3956460 | 4.7370540  | 3.6047010  | 8 | 6.3610480 | 1.5061180  | 5.1853070  |
| 6 | 4.7382060 | 4.9308700  | 0.7659890  | 7 | 5.0066000 | 3.3621710  | 5.2762740  |
| 6 | 4.0629620 | 4.5544770  | 5.0435410  | 6 | 4.6849370 | 4.7740000  | 3.2794200  |
| 6 | 4.1837240 | 3.2003750  | 7.0770770  | 6 | 4.8693510 | 5.0922240  | 0.4372090  |
| 6 | 3.8473390 | 5.8339400  | 2.8882760  | 6 | 4.4190130 | 4.5169550  | 4.7202460  |
| 6 | 4.0249010 | 5.8994170  | 1.4780390  | 6 | 4.6669860 | 3.0797400  | 6.6829580  |
| 8 | 3.3421730 | 5.3246360  | 5.6797890  | 6 | 4.0813460 | 5.8891020  | 2.6412550  |
| 1 | 4.6691280 | 2.2808980  | 7.4372210  | 6 | 4.1885530 | 6.0215780  | 1.2286610  |
| 1 | 4.4871730 | 4.0711810  | 7.6871710  | 8 | 3.6970930 | 5.2306990  | 5.4177600  |
| 1 | 3.0824230 | 3.1127150  | 7.1370400  | 1 | 5.2000630 | 2.1652000  | 6.9828050  |
| 6 | 3.0971580 | 6.8776240  | 3.4945440  | 1 | 4.9621470 | 3.9341970  | 7.3195040  |
| 1 | 3.5355530 | 6.7290480  | 0.9586110  | 1 | 3.5728590 | 2.9468940  | 6.7787270  |
| 6 | 2.4682120 | 7.8558460  | 3.8950040  | 6 | 3.3259420 | 6.8796240  | 3.3258910  |
| 6 | 6.2678790 | 2.9236640  | -0.6635510 | 1 | 3.6608330 | 6.8653090  | 0.7733170  |
| 6 | 4.7145910 | 4.8779490  | -0.7086800 | 6 | 2.6759250 | 7.8152510  | 3.7895390  |
| 6 | 1.7545230 | 8.9142120  | 4.5214730  | 6 | 6.2648230 | 3.1108840  | -1.1564490 |
| 6 | 6.9903450 | 1.9637460  | -1.3780760 | 6 | 4.7673980 | 5.1055750  | -1.0354270 |
| 6 | 5.4364370 | 3.8413370  | -1.3916370 | 6 | 1.9424180 | 8.8238020  | 4.4727340  |
| 6 | 3.9214110 | 5.7518660  | -1.4564600 | 6 | 6.8896620 | 2.1399490  | -1.9432480 |
| 6 | 1.3093760 | 10.0541690 | 3.8023470  | 6 | 5.4209780 | 4.0791090  | -1.7988420 |
| 6 | 1.4725190 | 8.8556090  | 5.9139790  | 6 | 3.9681860 | 6.0352940  | -1.7060010 |
| 6 | 6.8531040 | 1.7926570  | -2.7851760 | 6 | 1.4565000 | 9.9804350  | 3.8085290  |
| 1 | 7.6635060 | 1.2716570  | -0.8620190 | 6 | 1.6790570 | 8.6983480  | 5.8644020  |
| 6 | 5.2661390 | 3.6754080  | -2.8155900 | 6 | 6.6760090 | 2.0331490  | -3.3474820 |
| 1 | 3.3676470 | 6.5605270  | -0.9699400 | 1 | 7.5472330 | 1.3923080  | -1.4895890 |
| 6 | 3.7541800 | 5.6211770  | -2.8641730 | 6 | 5.1874540 | 3.9900150  | -3.2211440 |
| 6 | 0.5957590 | 11.0546390 | 4.4661330  | 1 | 3.4629270 | 6.8365740  | -1.1580820 |
| 1 | 1.5184730 | 10.1578060 | 2.7302980  | 6 | 3.7407200 | 5.9806050  | -3.1111240 |
| 6 | 0.7512530 | 9.8907940  | 6.5144530  | 6 | 0.7264160 | 10.9329060 | 4.5227810  |
| 1 | 1.8145230 | 7.9981710  | 6.5072410  | 1 | 1.6485870 | 10.1344260 | 2.7393130  |
| 6 | 5.9510950 | 2.6247820  | -3.5047210 | 6 | 0.9391070 | 9.6878420  | 6.5174770  |
| 6 | 7.6192550 | 0.7641240  | -3.3975820 | 1 | 2.0511000 | 7.8263620  | 6.4170030  |
| 6 | 4.3970310 | 4.5513990  | -3.5408200 | 6 | 5.7979260 | 2.9467900  | -3.9865330 |
| 6 | 2.9498390 | 6.6012440  | -3.5084600 | 6 | 7.3633080 | 0.9782460  | -4.0103310 |
| 7 | 0.3131140 | 10.9598500 | 5.7933110  | 6 | 4.3280800 | 4.9329930  | -3.8689870 |
| 1 | 0.2557940 | 11.9733470 | 3.9642080  | 6 | 2.9233570 | 6.9998340  | -3.6715800 |
| 1 | 0.5109820 | 9.9043340  | 7.5915310  | 7 | 0.4658190 | 10.7756770 | 5.8486500  |
| 6 | 5.7160630 | 2.3837730  | -4.9592440 | 1 | 0.3568280 | 11.8643850 | 4.0649120  |
| 6 | 8.3223270 | -0.1334800 | -3.8590480 | 1 | 0.7142070 | 9.6498250  | 7.5972960  |
| 6 | 4.1510280 | 4.3468460  | -4.9940810 | 6 | 5.5112130 | 2.7920200  | -5.4410650 |
| 6 | 2.2918980 | 7.5499700  | -3.9334430 | 6 | 8.0438100 | 0.0326190  | -4.4057360 |
| 8 | 6.2532880 | 1.4680440  | -5.5840330 | 6 | 4.0355860 | 4.8192800  | -5.3253610 |
| 7 | 4.8162000 | 3.2630480  | -5.6034030 | 6 | 2.2371420 | 7.9545950  | -4.0331180 |
| 6 | 9.0051820 | -1.1168190 | -4.6282850 | 8 | 5.9920150 | 1.8854080  | -6.1216790 |
| 8 | 3.3985490 | 5.0565890  | -5.6629190 | 7 | 4.6395370 | 3.7464170  | -6.0130860 |
| 6 | 1.5803100 | 8.5958640  | -4.5840830 | 6 | 8.7943210 | -1.0497610 | -4.9415270 |
| 6 | 4.5367400 | 3.0591590  | -7.0375280 | 8 | 3.2973970 | 5.5957220  | -5.9334790 |
| 6 | 9.9937120 | -1.9763300 | -4.0853270 | 6 | 1.4657280 | 8.9880440  | -4.6329300 |
| 6 | 8.6869620 | -1.2593530 | -6.0073570 | 6 | 4.3183840 | 3.6348290  | -7.4482050 |
| 6 | 1.1010240 | 9.7334640  | -3.8827780 | 6 | 9.7463600 | -1.7472120 | -4.1520150 |
| 6 | 1.3487950 | 8.5367380  | -5.9853550 | 6 | 8.6149590 | -1.4760270 | -6.2852760 |
| 1 | 3.4523320 | 2.9006370  | -7.1861220 | 6 | 0.9495860 | 10.0805410 | -3.8882100 |
| 1 | 4.8272920 | 3.9614240  | -7.6073250 | 6 | 1.1951420 | 8.9504240  | -6.0281480 |
| 1 | 5.1110610 | 2.1831860  | -7.3740790 | 1 | 3.2257850 | 3.5224200  | -7.5783360 |

|    |            |            |            |    |            |            |            |
|----|------------|------------|------------|----|------------|------------|------------|
| 6  | 10.6001160 | -2.9357840 | -4.9018320 | 1  | 4.6280690  | 4.5573950  | -7.9737050 |
| 1  | 10.2839310 | -1.9056460 | -3.0295590 | 1  | 4.8527090  | 2.7592260  | -7.8467730 |
| 6  | 9.3335480  | -2.2370520 | -6.7670690 | 6  | 10.4497610 | -2.8224320 | -4.6993730 |
| 1  | 7.9328680  | -0.6067040 | -6.4649990 | 1  | 9.9318620  | -1.4559750 | -3.1105890 |
| 6  | 0.4250740  | 10.7407010 | -4.5760350 | 6  | 9.3519490  | -2.5599100 | -6.7716680 |
| 1  | 1.2619090  | 9.8339040  | -2.8020720 | 1  | 7.8981550  | -0.9619700 | -6.9378480 |
| 6  | 0.6600290  | 9.5766990  | -6.6157920 | 6  | 0.1883910  | 11.0590650 | -4.5324460 |
| 1  | 1.7100970  | 7.6786040  | -6.5660850 | 1  | 1.1409460  | 10.1651060 | -2.8111010 |
| 7  | 10.2673130 | -3.0614280 | -6.2152390 | 6  | 0.4231470  | 9.9602950  | -6.6086030 |
| 1  | 9.1236860  | -2.3742930 | -7.8421470 | 1  | 1.5856590  | 8.1276350  | -6.6402930 |
| 7  | 0.2095530  | 10.6551790 | -5.9165310 | 7  | 10.2464140 | -3.2199070 | -5.9850360 |
| 1  | 0.0643210  | 11.6612000 | -4.0865390 | 1  | 9.2506340  | -2.9158000 | -7.8119220 |
| 1  | 0.4580810  | 9.5828640  | -7.7012020 | 7  | -0.0729370 | 10.9885950 | -5.8656470 |
| 78 | -1.1998960 | 12.0028300 | -6.8509200 | 1  | -0.2154710 | 11.9411100 | -4.0067600 |
| 78 | -1.2363410 | 12.2157240 | 6.6128570  | 1  | 0.1813340  | 9.9774380  | -7.6858130 |
| 7  | 8.8295850  | -5.9266850 | 6.0941370  | 78 | -1.6406250 | 12.2211920 | -6.6996550 |
| 6  | 7.5592730  | -5.7943100 | 6.5666220  | 78 | -1.0796960 | 11.9789550 | 6.7507690  |
| 6  | 9.0464680  | -6.2824820 | 4.7988960  | 7  | 8.9379440  | -5.8502950 | 5.7709050  |
| 6  | 6.4519620  | -5.9983610 | 5.7414250  | 6  | 7.7720170  | -5.5653100 | 6.4135010  |
| 1  | 7.4654940  | -5.5556800 | 7.6372020  | 6  | 8.9188830  | -6.3473990 | 4.5042990  |
| 6  | 7.9833740  | -6.5014930 | 3.9171010  | 6  | 6.5346610  | -5.7479900 | 5.7910970  |
| 1  | 10.1019280 | -6.3997860 | 4.4972990  | 1  | 7.8690780  | -5.2186410 | 7.4543370  |
| 6  | 6.6503360  | -6.3509740 | 4.3775300  | 6  | 7.7163380  | -6.5514970 | 3.8223360  |
| 1  | 5.4329800  | -5.8885230 | 6.1332240  | 1  | 9.9001100  | -6.5928660 | 4.0616910  |
| 1  | 8.1910120  | -6.7873360 | 2.8783010  | 6  | 6.4859690  | -6.2387530 | 4.4575200  |
| 6  | 5.5078120  | -6.5411120 | 3.5501920  | 1  | 5.6045860  | -5.5120960 | 6.3234910  |
| 6  | 4.3851830  | -6.6560970 | 3.0605850  | 1  | 7.7342240  | -6.9509290 | 2.8005690  |
| 6  | 3.1212910  | -6.8164430 | 2.4322460  | 6  | 5.2327190  | -6.4060070 | 3.8058050  |
| 6  | 3.1019630  | -6.9819920 | 1.0202320  | 6  | 4.0849940  | -6.5055020 | 3.3745860  |
| 6  | 1.8899840  | -6.7697060 | 3.1440450  | 6  | 2.8255850  | -6.6700160 | 2.7354190  |
| 6  | 1.9109390  | -7.0884670 | 0.2951360  | 6  | 2.8395990  | -6.8993710 | 1.3317890  |
| 1  | 4.0690610  | -6.9527060 | 0.5087870  | 6  | 1.5778640  | -6.5714460 | 3.4082290  |
| 6  | 1.8812160  | -6.3710130 | 4.5801640  | 6  | 1.6666850  | -7.0033360 | 0.5782660  |
| 6  | 0.6669520  | -7.0282250 | 2.4481020  | 1  | 3.8204490  | -6.9170880 | 0.8469230  |
| 6  | 0.6724830  | -7.1984490 | 1.0146280  | 6  | 1.5409880  | -6.1138380 | 4.8241930  |
| 8  | 2.9017560  | -6.0818670 | 5.2067010  | 6  | 0.3681640  | -6.8380030 | 2.6914300  |
| 7  | 0.6131450  | -6.2903410 | 5.1976640  | 6  | 0.4070020  | -7.0563320 | 1.2656240  |
| 6  | -0.5717950 | -7.0327480 | 3.1631500  | 8  | 2.5489120  | -5.7703410 | 5.4440690  |
| 6  | -0.5705010 | -7.3739160 | 0.3160010  | 7  | 0.2644790  | -6.0473840 | 5.4256650  |
| 6  | -0.6153600 | -6.6252080 | 4.5949510  | 6  | -0.8853230 | -6.8168130 | 3.3787470  |
| 6  | 0.5374960  | -5.8105520 | 6.5904130  | 6  | -0.8208210 | -7.2280340 | 0.5401220  |
| 6  | -1.7778860 | -7.3388930 | 2.4728930  | 6  | -0.9538220 | -6.3972900 | 4.8067040  |
| 6  | -1.7461980 | -7.5138990 | 1.0616390  | 6  | 0.1669620  | -5.5574530 | 6.8132910  |
| 8  | -1.6550980 | -6.5252840 | 5.2492450  | 6  | -2.0770020 | -7.1363870 | 2.6683210  |
| 1  | 1.5633170  | -5.6236500 | 6.9410140  | 6  | -2.0157780 | -7.3352530 | 1.2608640  |
| 1  | -0.0641910 | -4.8825990 | 6.6288070  | 8  | -2.0029490 | -6.3040390 | 5.4464180  |
| 1  | 0.0367560  | -6.5674770 | 7.2212370  | 1  | 1.1876590  | -5.3625920 | 7.1750940  |
| 6  | -3.0361400 | -7.4166130 | 3.1277430  | 1  | -0.4399570 | -4.6324470 | 6.8407940  |
| 1  | -2.7060200 | -7.6915380 | 0.5664930  | 1  | -0.3385560 | -6.3131680 | 7.4417840  |
| 6  | -4.1386630 | -7.4901300 | 3.6683940  | 6  | -3.3443010 | -7.2282830 | 3.3035520  |
| 6  | 1.8855630  | -6.9669400 | -1.1758970 | 1  | -2.9652700 | -7.5185720 | 0.7478270  |
| 6  | -0.5942060 | -7.2685670 | -1.1574750 | 6  | -4.4497870 | -7.3369050 | 3.8318800  |
| 6  | -5.2457130 | -7.4707900 | 4.5636960  | 6  | 1.6838880  | -6.9225600 | -0.8952410 |
| 6  | 3.0483780  | -6.7147820 | -1.9090410 | 6  | -0.8018600 | -7.1701920 | -0.9361960 |
| 6  | 0.6258770  | -6.9952440 | -1.8661040 | 6  | -5.5773000 | -7.3672440 | 4.7004740  |
| 6  | -1.7923420 | -7.3071480 | -1.8767330 | 6  | 2.8693620  | -6.6940570 | -1.5986170 |

|   |            |            |            |   |            |            |            |
|---|------------|------------|------------|---|------------|------------|------------|
| 6 | -6.5660310 | -7.8279950 | 4.1917190  | 6 | 0.4432450  | -6.9490720 | -1.6192750 |
| 6 | -5.0165990 | -7.0685000 | 5.9095130  | 6 | -1.9801150 | -7.2085290 | -1.6879250 |
| 6 | 3.0301070  | -6.4320300 | -3.3043160 | 6 | -6.8763910 | -7.7537150 | 4.2854040  |
| 1 | 4.0264070  | -6.6989000 | -1.4184120 | 6 | -5.3965100 | -6.9891730 | 6.0604790  |
| 6 | 0.5791890  | -6.6825540 | -3.2754920 | 6 | 2.8947380  | -6.4462260 | -3.0003690 |
| 1 | -2.7389900 | -7.5322150 | -1.3756070 | 1 | 3.8318990  | -6.6660370 | -1.0791560 |
| 6 | -1.8621240 | -7.0090720 | -3.2674890 | 6 | 0.4420400  | -6.6806490 | -3.0385120 |
| 6 | -7.5916260 | -7.7553820 | 5.1395110  | 1 | -2.9453230 | -7.3925240 | -1.2055060 |
| 1 | -6.7944770 | -8.1581820 | 3.1706670  | 6 | -2.0033090 | -6.9687380 | -3.0917260 |
| 6 | -6.0883780 | -7.0178600 | 6.8027190  | 6 | -7.9291810 | -7.7285480 | 5.2050860  |
| 1 | -4.0035740 | -6.7944630 | 6.2296530  | 1 | -7.0681120 | -8.0671230 | 3.2516140  |
| 6 | 1.7844610  | -6.3763790 | -3.9835230 | 6 | -6.4936190 | -6.9868310 | 6.9242400  |
| 6 | 4.2855270  | -6.2189210 | -3.9370350 | 1 | -4.4012370 | -6.6931490 | 6.4149850  |
| 6 | -0.6745480 | -6.6556340 | -3.9653300 | 6 | 1.6713510  | -6.4077010 | -3.7183740 |
| 6 | -3.1406840 | -7.0686470 | -3.8853790 | 6 | 4.1713060  | -6.2436100 | -3.5932490 |
| 7 | -7.3520010 | -7.3482630 | 6.4143230  | 6 | -0.7898520 | -6.6601760 | -3.7666120 |
| 1 | -8.6245700 | -8.0436210 | 4.9071680  | 6 | -3.2614550 | -7.0424620 | -3.7486980 |
| 1 | -5.9664310 | -6.7259760 | 7.8598930  | 7 | -7.7371330 | -7.3414270 | 6.4942870  |
| 6 | 1.7443320  | -5.9819290 | -5.4184420 | 1 | -8.9477650 | -8.0314860 | 4.9335000  |
| 6 | 5.4299400  | -6.0999480 | -4.3724090 | 1 | -6.4098820 | -6.7096890 | 7.9889170  |
| 6 | -0.7525380 | -6.2391570 | -5.3964700 | 6 | 1.6802410  | -6.0607190 | -5.1656210 |
| 6 | -4.2753120 | -7.1690870 | -4.3499960 | 6 | 5.3370510  | -6.1310620 | -3.9699730 |
| 8 | 2.7465140  | -5.6926140 | -6.0737990 | 6 | -0.8182690 | -6.2952410 | -5.2138660 |
| 7 | 0.4732180  | -5.9264120 | -6.0260390 | 6 | -4.3769610 | -7.1561000 | -4.2548430 |
| 6 | 6.6710650  | -5.9359280 | -5.0479210 | 8 | 2.7064020  | -5.8041160 | -5.7971320 |
| 8 | -1.8151760 | -6.1514370 | -6.0137090 | 7 | 0.4298770  | -6.0155020 | -5.8150220 |
| 6 | -5.4728760 | -7.1907830 | -5.1187400 | 6 | 6.6262630  | -6.0074270 | -4.5580160 |
| 6 | 0.4517180  | -5.5026780 | -7.4387830 | 8 | -1.8593320 | -6.2215370 | -5.8683810 |
| 6 | 7.9175540  | -6.1754010 | -4.4121620 | 6 | -5.5370960 | -7.1926860 | -5.0786020 |
| 6 | 6.6889210  | -5.5327680 | -6.4113880 | 6 | 0.4573420  | -5.6409970 | -7.2414110 |
| 6 | -5.4522590 | -6.6685620 | -6.4417810 | 6 | 7.8134240  | -6.0453750 | -3.7803720 |
| 6 | -6.6957230 | -7.7214410 | -4.6333560 | 6 | 6.7617100  | -5.8593110 | -5.9657370 |
| 1 | -0.5957800 | -5.4967580 | -7.7752370 | 6 | -5.4490820 | -6.6971800 | -6.4091020 |
| 1 | 0.9010170  | -4.4964330 | -7.5331500 | 6 | -6.7847460 | -7.7086180 | -4.6430540 |
| 1 | 1.0561210  | -6.2005180 | -8.0477740 | 1 | -0.5791590 | -5.6322760 | -7.6103290 |
| 6 | 9.1043570  | -5.9908340 | -5.1256100 | 1 | 0.9243800  | -4.6450190 | -7.3562100 |
| 1 | 7.9584340  | -6.5061400 | -3.3667820 | 1 | 1.0694300  | -6.3678150 | -7.8073970 |
| 6 | 7.9128970  | -5.3608530 | -7.0636210 | 6 | 9.0558130  | -5.9254580 | -4.4069120 |
| 1 | 5.7456250  | -5.3548560 | -6.9430450 | 1 | 7.7654330  | -6.1728630 | -2.6916320 |
| 6 | -6.6251930 | -6.6684410 | -7.1995560 | 6 | 8.0363530  | -5.7452950 | -6.5282450 |
| 1 | -4.5177700 | -6.2696030 | -6.8561780 | 1 | 5.8693100  | -5.8353090 | -6.6038250 |
| 6 | -7.8316940 | -7.6940630 | -5.4481010 | 6 | -6.5853050 | -6.7002620 | -7.2204450 |
| 1 | -6.7606060 | -8.1527690 | -3.6265360 | 1 | -4.4927710 | -6.3129740 | -6.7857310 |
| 7 | 9.0944060  | -5.5781580 | -6.4217730 | 6 | -7.8811750 | -7.6863340 | -5.5106380 |
| 1 | 10.0963310 | -6.1989400 | -4.6939030 | 1 | -6.9003440 | -8.1215460 | -3.6330870 |
| 1 | 7.9838790  | -5.0590390 | -8.1230050 | 7 | 9.1569500  | -5.7718470 | -5.7548470 |
| 7 | -7.7911660 | -7.1640600 | -6.7005430 | 1 | 10.0089280 | -5.9891180 | -3.8571680 |
| 1 | -6.6638670 | -6.3035420 | -8.2383480 | 1 | 8.2007150  | -5.6488070 | -7.6155400 |
| 1 | -8.8030310 | -8.1087960 | -5.1271270 | 7 | -7.7785950 | -7.1746890 | -6.7672220 |
| 7 | -2.4480310 | 10.6385830 | 5.7654320  | 1 | -6.5729830 | -6.3495400 | -8.2646820 |
| 6 | -2.7918620 | 10.7255150 | 4.4516410  | 1 | -8.8710480 | -8.0853670 | -5.2289440 |
| 6 | -2.6391160 | 9.4749020  | 6.4470860  | 7 | -2.2891410 | 10.4034390 | 5.8944580  |
| 6 | -3.3366480 | 9.6355620  | 3.7675270  | 6 | -2.6549130 | 10.5048130 | 4.5876420  |
| 1 | -2.5958930 | 11.6915990 | 3.9544480  | 6 | -2.4719100 | 9.2327160  | 6.5661970  |
| 6 | -3.1760340 | 8.3460750  | 5.8223230  | 6 | -3.2192770 | 9.4248410  | 3.9033060  |
| 6 | -3.5335110 | 8.4054700  | 4.4472140  | 1 | -2.4713660 | 11.4777340 | 4.0991760  |

|   |             |            |            |   |             |            |            |
|---|-------------|------------|------------|---|-------------|------------|------------|
| 1 | -3.5988840  | 9.7406630  | 2.7073460  | 6 | -3.0308520  | 8.1144890  | 5.9416690  |
| 1 | -3.3174810  | 7.4161340  | 6.3873100  | 6 | -3.4165360  | 8.1905940  | 4.5753380  |
| 6 | -4.0701630  | 7.2583390  | 3.7997950  | 1 | -3.5027040  | 9.5426750  | 2.8498980  |
| 6 | -4.5251300  | 6.1947310  | 3.3815600  | 1 | -3.1718680  | 7.1815340  | 6.5018030  |
| 6 | -5.0959570  | 5.0429400  | 2.7745240  | 6 | -3.9855810  | 7.0576590  | 3.9301360  |
| 6 | -5.3582430  | 5.1079180  | 1.3766900  | 6 | -4.4803810  | 6.0091620  | 3.5188630  |
| 6 | -5.3789330  | 3.8406240  | 3.4779230  | 6 | -5.0828660  | 4.8777340  | 2.9030750  |
| 6 | -5.8981320  | 4.0334890  | 0.6633190  | 6 | -5.2836740  | 4.9406150  | 1.4951600  |
| 1 | -5.0622460  | 6.0285360  | 0.8640930  | 6 | -5.4568940  | 3.7013750  | 3.6052750  |
| 6 | -4.9151630  | 3.6818550  | 4.8841750  | 6 | -5.8413170  | 3.8858610  | 0.7664300  |
| 6 | -6.0539390  | 2.7754680  | 2.8025600  | 1 | -4.9285730  | 5.8438030  | 0.9892930  |
| 6 | -6.3345920  | 2.8752970  | 1.3906660  | 6 | -5.0899340  | 3.5561040  | 5.0422080  |
| 8 | -4.2944520  | 4.5557950  | 5.4909330  | 6 | -6.1207130  | 2.6457990  | 2.9047830  |
| 7 | -5.1751580  | 2.4300120  | 5.4894870  | 6 | -6.3265840  | 2.7373210  | 1.4783890  |
| 6 | -6.3840090  | 1.5790900  | 3.5136140  | 8 | -4.4896890  | 4.4275030  | 5.6725600  |
| 6 | -6.9526220  | 1.7705150  | 0.7116870  | 7 | -5.4352250  | 2.3300940  | 5.6541180  |
| 6 | -5.8812820  | 1.3635330  | 4.8978110  | 6 | -6.5216870  | 1.4688390  | 3.6115660  |
| 6 | -4.6363940  | 2.1774050  | 6.8381600  | 6 | -6.9331020  | 1.6402790  | 0.7764040  |
| 6 | -7.1289060  | 0.5602440  | 2.8581050  | 6 | -6.1462850  | 1.2798570  | 5.0404490  |
| 6 | -7.4115720  | 0.6886820  | 1.4707260  | 6 | -5.0284920  | 2.1032680  | 7.0530960  |
| 8 | -6.0140830  | 0.3057950  | 5.5171160  | 6 | -7.2266020  | 0.4461790  | 2.9211270  |
| 1 | -4.1756000  | 3.1092260  | 7.1988200  | 6 | -7.4224850  | 0.5600280  | 1.5157000  |
| 1 | -5.4499680  | 1.8498920  | 7.5102740  | 8 | -6.3974080  | 0.2596680  | 5.6848330  |
| 1 | -3.8858360  | 1.3647670  | 6.7914030  | 1 | -4.5031260  | 3.0045960  | 7.4029010  |
| 6 | -7.5584500  | -0.6240120 | 3.5144720  | 1 | -5.9199200  | 1.9010540  | 7.6751940  |
| 1 | -7.9391420  | -0.1451070 | 0.9969660  | 1 | -4.3690760  | 1.2166910  | 7.1082540  |
| 6 | -7.9662010  | -1.6627780 | 4.0312840  | 6 | -7.7210940  | -0.7203520 | 3.5638250  |
| 6 | -5.9153050  | 4.0091480  | -0.8128530 | 1 | -7.9222970  | -0.2781950 | 1.0202020  |
| 6 | -6.9627040  | 1.7426630  | -0.7641440 | 6 | -8.1887770  | -1.7420270 | 4.0640940  |
| 6 | -8.2781650  | -2.7827040 | 4.8518220  | 6 | -5.8316300  | 3.8743750  | -0.7097410 |
| 6 | -5.3840010  | 5.0571450  | -1.5683490 | 6 | -6.8981880  | 1.6162920  | -0.6998850 |
| 6 | -6.3814210  | 2.8333980  | -1.4948210 | 6 | -8.5728890  | -2.8377870 | 4.8869900  |
| 6 | -7.4145660  | 0.6241050  | -1.4715570 | 6 | -5.3014090  | 4.9346660  | -1.4499680 |
| 6 | -9.2021320  | -3.7910510 | 4.4767220  | 6 | -6.2759450  | 2.7003300  | -1.4075510 |
| 6 | -7.6367580  | -2.9068800 | 6.1150940  | 6 | -7.3542800  | 0.5135250  | -1.4289580 |
| 6 | -5.2289320  | 4.9822840  | -2.9827180 | 6 | -9.4947110  | -3.8360630 | 4.4810210  |
| 1 | -5.0319150  | 5.9735230  | -1.0844800 | 6 | -8.0046840  | -2.9469730 | 6.1862750  |
| 6 | -6.2134190  | 2.7251610  | -2.9253970 | 6 | -5.0828990  | 4.8539970  | -2.8545990 |
| 1 | -7.8673190  | -0.2230760 | -0.9473410 | 1 | -4.9967110  | 5.8637570  | -0.9580510 |
| 6 | -7.2648920  | 0.4976730  | -2.8805080 | 6 | -6.0362210  | 2.5836680  | -2.8262340 |
| 6 | -9.4456300  | -4.8623690 | 5.3420590  | 1 | -7.8646600  | -0.3162010 | -0.9298190 |
| 1 | -9.7258630  | -3.7449040 | 3.5136890  | 6 | -7.1339510  | 0.3792210  | -2.8286310 |
| 6 | -7.9237370  | -4.0047170 | 6.9291970  | 6 | -9.7984290  | -4.8901240 | 5.3486680  |
| 1 | -6.9209580  | -2.1424200 | 6.4428400  | 1 | -9.9668830  | -3.7978460 | 3.4913510  |
| 6 | -5.6119230  | 3.7952210  | -3.6618600 | 6 | -8.3482250  | -4.0284200 | 6.9998380  |
| 6 | -4.6791090  | 6.1219510  | -3.6313040 | 1 | -7.2982620  | -2.1853920 | 6.5398880  |
| 6 | -6.6293030  | 1.5399820  | -3.6096940 | 6 | -5.3955290  | 3.6478960  | -3.5367610 |
| 6 | -7.7530560  | -0.6878120 | -3.4939970 | 6 | -4.5565520  | 6.0110670  | -3.4926000 |
| 7 | -8.8131270  | -4.9614340 | 6.5427710  | 6 | -6.4243820  | 1.3968630  | -3.5238740 |
| 1 | -10.1350530 | -5.6835020 | 5.0799470  | 6 | -7.6341600  | -0.7855530 | -3.4710340 |
| 1 | -7.4509310  | -4.1290120 | 7.9189080  | 7 | -9.2261340  | -4.9817030 | 6.5796860  |
| 6 | -5.3684890  | 3.6772020  | -5.1283590 | 1 | -10.4817410 | -5.7082640 | 5.0627820  |
| 6 | -4.2212380  | 7.1746370  | -4.0729350 | 1 | -7.9277520  | -4.1468540 | 8.0134340  |
| 6 | -6.3824910  | 1.3824530  | -5.0714860 | 6 | -5.0405490  | 3.5042270  | -4.9767320 |
| 6 | -8.2155980  | -1.7214250 | -3.9744440 | 6 | -4.1604510  | 7.0912820  | -3.9277600 |
| 8 | -4.8436970  | 4.5694610  | -5.7953300 | 6 | -6.0690490  | 1.2139960  | -4.9594830 |

|    |             |            |             |    |             |            |             |
|----|-------------|------------|-------------|----|-------------|------------|-------------|
| 7  | -5.7602870  | 2.4604290  | -5.7314180  | 6  | -8.1198300  | -1.7891730 | -3.9903770  |
| 6  | -3.6810610  | 8.3108160  | -4.7358790  | 8  | -4.4603920  | 4.3830270  | -5.6153350  |
| 8  | -6.6794150  | 0.3711700  | -5.7105300  | 7  | -5.3860090  | 2.2761140  | -5.5855070  |
| 6  | -8.6393800  | -2.8065210 | -4.7923610  | 6  | -3.7113860  | 8.2746960  | -4.5764610  |
| 6  | -5.5134370  | 2.2794240  | -7.1742910  | 8  | -6.3224290  | 0.1940580  | -5.6035360  |
| 6  | -3.4991170  | 9.5526320  | -4.0733120  | 6  | -8.5547660  | -2.8436700 | -4.8415850  |
| 6  | -3.3013800  | 8.2282600  | -6.1039630  | 6  | -5.0194120  | 2.0647300  | -6.9983550  |
| 6  | -9.4299520  | -3.8829110 | -4.3153530  | 6  | -3.5984660  | 9.5109340  | -3.8881810  |
| 6  | -8.2602000  | -2.8178370 | -6.1634450  | 6  | -3.3712830  | 8.2525370  | -5.9570000  |
| 1  | -4.8821420  | 1.3857840  | -7.3346890  | 6  | -9.4107850  | -3.8900150 | -4.4136440  |
| 1  | -6.4719190  | 2.1152190  | -7.7014150  | 6  | -8.1193040  | -2.8535350 | -6.1957770  |
| 1  | -5.0140010  | 3.1858640  | -7.5479970  | 1  | -4.3709900  | 1.1729590  | -7.0855060  |
| 6  | -2.9324610  | 10.6283840 | -4.7614350  | 1  | -5.9297140  | 1.8802940  | -7.5988240  |
| 1  | -3.7905440  | 9.6753690  | -3.0226210  | 1  | -4.4962020  | 2.9665480  | -7.3501840  |
| 6  | -2.7389890  | 9.3426550  | -6.7318910  | 6  | -3.1448010  | 10.6439970 | -4.5681000  |
| 1  | -3.4429200  | 7.2909240  | -6.6566720  | 1  | -3.8610950  | 9.5864850  | -2.8255050  |
| 6  | -9.7981550  | -4.9106810 | -5.1886380  | 6  | -2.9242040  | 9.4229520  | -6.5759360  |
| 1  | -9.7598360  | -3.9199650 | -3.2695560  | 1  | -3.4576760  | 7.3197720  | -6.5285000  |
| 6  | -8.6553460  | -3.8806430 | -6.9791540  | 6  | -9.7856680  | -4.8895160 | -5.3162980  |
| 1  | -7.6565170  | -1.9962590 | -6.5692600  | 1  | -9.7849010  | -3.9267420 | -3.3828400  |
| 7  | -2.5496720  | 10.5130300 | -6.0622080  | 6  | -8.5270380  | -3.8865430 | -7.0430600  |
| 1  | -2.7677520  | 11.6135280 | -4.2895970  | 1  | -7.4612250  | -2.0558860 | -6.5629750  |
| 1  | -2.4362240  | 9.3444010  | -7.7923480  | 7  | -2.8074860  | 10.5907170 | -5.8854460  |
| 7  | -9.4094530  | -4.9059180 | -6.4925800  | 1  | -3.0432540  | 11.6288190 | -4.0783120  |
| 1  | -10.4308640 | -5.7528890 | -4.8584200  | 1  | -2.6658730  | 9.4732440  | -7.6467680  |
| 1  | -8.3654810  | -3.9445930 | -8.0423520  | 7  | -9.3436090  | -4.8846770 | -6.6031330  |
| 78 | -8.9952970  | -6.7831700 | 7.6855610   | 1  | -10.4641780 | -5.7090640 | -5.0219670  |
| 78 | -9.6512620  | -6.6891500 | -7.6821520  | 1  | -8.1977000  | -3.9490100 | -8.0947480  |
| 78 | 10.9182000  | -4.8187170 | -7.2877770  | 78 | -9.4366650  | -6.8089480 | 7.7100720   |
| 78 | 10.4727210  | -5.1443720 | 7.2489500   | 78 | -9.5884050  | -6.6525890 | -7.8172860  |
| 15 | -2.9219060  | 13.2054560 | -7.8137410  | 78 | 11.0407860  | -5.1332980 | -6.5918040  |
| 15 | 0.4742620   | 13.4686610 | -7.4700560  | 78 | 10.8043990  | -5.0972060 | 6.5438740   |
| 15 | 0.3031520   | 13.7932420 | 7.3588730   | 15 | -3.5107970  | 13.2762740 | -7.5553720  |
| 15 | -3.1624390  | 13.2528850 | 7.3408180   | 15 | -0.1388990  | 13.8435560 | -7.3615060  |
| 15 | 11.4070260  | -6.8736520 | -8.2674710  | 15 | 0.4574760   | 13.5542560 | 7.4997050   |
| 15 | 12.7403750  | -3.6269990 | -8.0574030  | 15 | -2.9962760  | 12.9691160 | 7.5743540   |
| 15 | 12.1622000  | -3.9520790 | 8.2761970   | 15 | 11.6766500  | -7.3213600 | -7.0485630  |
| 15 | 10.9162510  | -7.2288440 | 8.1802040   | 15 | 12.9193290  | -4.0752760 | -7.4187120  |
| 15 | -10.7152990 | -5.7918370 | 8.8619420   | 15 | 12.7275870  | -3.9566570 | 7.1151380   |
| 15 | -9.0099230  | -8.8502880 | 8.7624960   | 15 | 11.2643670  | -7.1004980 | 7.6349380   |
| 15 | -11.6473680 | -5.8417520 | -8.4769960  | 15 | -11.2148260 | -5.8422030 | 8.8149260   |
| 15 | -9.6216170  | -8.6855030 | -8.8783670  | 15 | -9.4706700  | -8.8795910 | 8.7789640   |
| 1  | -2.3638250  | 9.4748370  | 7.5161970   | 15 | -11.5287500 | -5.7457270 | -8.6805220  |
| 1  | 11.3569550  | -3.6391860 | -4.5123750  | 15 | -9.5672830  | -8.6458440 | -9.0181090  |
| 6  | -11.3684080 | -4.4855950 | -9.6865240  | 1  | -2.1740230  | 9.2161190  | 7.6290390   |
| 1  | -12.3401420 | -4.0276250 | -9.9582600  | 1  | 11.1848540  | -3.3993190 | -4.1099970  |
| 1  | -10.7034860 | -3.7246730 | -9.2383640  | 6  | -11.1697920 | -4.3865640 | -9.8655940  |
| 1  | -10.8473700 | -4.8843280 | -10.5779290 | 1  | -12.1188150 | -3.8996910 | -10.1659450 |
| 6  | -12.6082890 | -5.0559010 | -7.1118220  | 1  | -10.4996610 | -3.6481150 | -9.3885570  |
| 1  | -12.7303330 | -5.7724740 | -6.2804140  | 1  | -10.6297990 | -4.7927390 | -10.7422060 |
| 1  | -12.0656590 | -4.1615550 | -6.7565870  | 6  | -12.5214150 | -4.9475190 | -7.3456940  |
| 1  | -13.5978010 | -4.7489530 | -7.5027520  | 1  | -12.6823320 | -5.6637480 | -6.5208060  |
| 6  | -12.8685270 | -6.9525150 | -9.2856790  | 1  | -11.9754770 | -4.0631000 | -6.9709620  |
| 1  | -12.4495440 | -7.3590340 | -10.2212910 | 1  | -13.4924250 | -4.6233340 | -7.7677510  |
| 1  | -13.1195670 | -7.7577810 | -8.5736020  | 6  | -12.7422530 | -6.8173900 | -9.5505380  |
| 1  | -13.7746620 | -6.3628420 | -9.5257080  | 1  | -12.2957260 | -7.2176720 | -10.4761640 |

|   |             |             |             |   |             |             |             |
|---|-------------|-------------|-------------|---|-------------|-------------|-------------|
| 6 | -10.7026790 | -10.0245610 | -8.2340720  | 1 | -13.0389800 | -7.6279210  | -8.8623820  |
| 1 | -11.7582040 | -9.7061330  | -8.2642510  | 1 | -13.6257370 | -6.2044970  | -9.8156780  |
| 1 | -10.5446270 | -10.9332460 | -8.8479430  | 6 | -10.7057230 | -9.9580470  | -8.4186750  |
| 1 | -10.4583290 | -10.2030730 | -7.1712650  | 1 | -11.7513220 | -9.6139250  | -8.4872610  |
| 6 | -9.9943440  | -8.6212430  | -10.6819430 | 1 | -10.5470120 | -10.8688250 | -9.0292670  |
| 1 | -11.0878870 | -8.6103630  | -10.8344160 | 1 | -10.5056970 | -10.1450700 | -7.3481610  |
| 1 | -9.5465280  | -7.7212440  | -11.1420870 | 6 | -9.8691940  | -8.5693110  | -10.8341170 |
| 1 | -9.5858860  | -9.5378720  | -11.1503370 | 1 | -10.9552850 | -8.5281280  | -11.0289630 |
| 6 | -7.9334640  | -9.4280220  | -8.8280380  | 1 | -9.3793070  | -7.6807380  | -11.2729950 |
| 1 | -7.9526360  | -10.3900030 | -9.3759220  | 1 | -9.4679450  | -9.4959760  | -11.2888200 |
| 1 | -7.2378020  | -8.7243630  | -9.3180930  | 6 | -7.9023840  | -9.4330890  | -8.9061870  |
| 1 | -7.6325960  | -9.6085480  | -7.7810400  | 1 | -7.9277250  | -10.3946620 | -9.4545680  |
| 6 | -12.2152870 | -5.6298390  | 7.8095840   | 1 | -7.1697730  | -8.7495300  | -9.3703130  |
| 1 | -11.9627350 | -5.0120580  | 6.9269500   | 1 | -7.6451470  | -9.6208350  | -7.8488840  |
| 1 | -12.5214670 | -6.6293410  | 7.4439940   | 6 | -12.6661650 | -5.6881630  | 7.6949020   |
| 1 | -13.0250980 | -5.1379290  | 8.3838500   | 1 | -12.3790560 | -5.0594900  | 6.8306830   |
| 6 | -8.4475950  | -8.8660110  | 10.5140950  | 1 | -12.9441080 | -6.6875600  | 7.3070600   |
| 1 | -8.4104120  | -9.9197580  | 10.8544290  | 1 | -13.5077600 | -5.2097400  | 8.2337770   |
| 1 | -7.4528910  | -8.3904600  | 10.5680960  | 6 | -8.9966200  | -8.9021860  | 10.5566700  |
| 1 | -9.1342090  | -8.2840590  | 11.1494380  | 1 | -8.9624850  | -9.9590900  | 10.8874720  |
| 6 | -10.3066260 | -4.0553260  | 9.3350700   | 1 | -8.0120710  | -8.4156560  | 10.6650380  |
| 1 | -9.3595110  | -4.0415500  | 9.9011410   | 1 | -9.7232850  | -8.3375860  | 11.1622490  |
| 1 | -10.2105270 | -3.4387550  | 8.4237810   | 6 | -10.8433130 | -4.1043110  | 9.3118070   |
| 1 | -11.1304020 | -3.6551140  | 9.9578270   | 1 | -9.9171140  | -4.0819140  | 9.9110210   |
| 6 | -10.5797310 | -9.8159250  | 8.7729760   | 1 | -10.7218530 | -3.4836140  | 8.4062420   |
| 1 | -10.7749350 | -10.1674830 | 7.7475670   | 1 | -11.6933410 | -3.7156790  | 9.9059620   |
| 1 | -10.4558370 | -10.6657410 | 9.4725780   | 6 | -11.0294060 | -9.8620260  | 8.7073690   |
| 1 | -11.4369770 | -9.1941760  | 9.0792600   | 1 | -11.1430140 | -10.2483980 | 7.6819510   |
| 6 | -11.2860070 | -6.5375560  | 10.4427000  | 1 | -10.9557800 | -10.6865310 | 9.4431500   |
| 1 | -10.4376280 | -6.4939840  | 11.1484820  | 1 | -11.9115060 | -9.2363330  | 8.9205170   |
| 1 | -12.1364320 | -5.9447410  | 10.8317890  | 6 | -11.8501990 | -6.6045590  | 10.3626760  |
| 1 | -11.6137740 | -7.5797330  | 10.2873860  | 1 | -11.0352310 | -6.5590820  | 11.1065520  |
| 6 | -7.8289810  | -10.0006830 | 7.9364170   | 1 | -12.7226920 | -6.0220320  | 10.7168450  |
| 1 | -8.1450810  | -10.1254900 | 6.8861150   | 1 | -12.1612840 | -7.6482360  | 10.1839100  |
| 1 | -6.8066160  | -9.5860790  | 7.9921940   | 6 | -8.2316340  | -10.0060210 | 8.0074170   |
| 1 | -7.8590880  | -10.9775530 | 8.4569290   | 1 | -8.4911510  | -10.1270790 | 6.9414000   |
| 6 | -4.3352720  | 12.0215690  | 8.0557580   | 1 | -7.2208190  | -9.5746870  | 8.1196380   |
| 1 | -4.6785540  | 11.3414070  | 7.2557640   | 1 | -8.2727900  | -10.9873320 | 8.5187900   |
| 1 | -3.8236380  | 11.4397720  | 8.8424900   | 6 | -4.1409660  | 11.6874360  | 8.2452890   |
| 1 | -5.2077320  | 12.5580140  | 8.4767580   | 1 | -4.5028500  | 11.0528650  | 7.4166240   |
| 6 | -3.0767450  | 14.5718430  | 8.6181170   | 1 | -3.6034040  | 11.0649340  | 8.9828100   |
| 1 | -2.5742200  | 14.1509320  | 9.5063340   | 1 | -5.0045850  | 12.1897650  | 8.7227230   |
| 1 | -2.5317220  | 15.4458200  | 8.2236670   | 6 | -2.8967910  | 14.2063480  | 8.9310210   |
| 1 | -4.1083440  | 14.8794450  | 8.8780180   | 1 | -2.3783550  | 13.7336150  | 9.7832870   |
| 6 | -0.0306940  | 15.5669750  | 6.9788880   | 1 | -2.3645970  | 15.1091870  | 8.5877140   |
| 1 | -0.6929520  | 15.9911610  | 7.7541940   | 1 | -3.9269540  | 14.4889370  | 9.2231460   |
| 1 | 0.9334110   | 16.1107540  | 7.0089540   | 6 | 0.0759730   | 15.3339300  | 7.2105180   |
| 1 | -0.4975380  | 15.6778290  | 5.9835100   | 1 | -0.6111190  | 15.6986020  | 7.9939460   |
| 6 | 0.6767980   | 13.7789650  | 9.1589980   | 1 | 1.0224890   | 15.9041200  | 7.2840830   |
| 1 | 1.0133460   | 12.7661580  | 9.4442900   | 1 | -0.3825310  | 15.4812440  | 6.2155350   |
| 1 | 1.4560280   | 14.5400280  | 9.3621290   | 6 | 0.9001290   | 13.4618940  | 9.2809430   |
| 1 | -0.2361820  | 13.9856200  | 9.7416480   | 1 | 1.2597440   | 12.4418850  | 9.5072190   |
| 6 | 1.9492460   | 13.4866620  | 6.5838530   | 1 | 1.6749410   | 14.2247130  | 9.4937780   |
| 1 | 1.8414480   | 13.6049970  | 5.4918330   | 1 | 0.0044310   | 13.6242840  | 9.9034640   |
| 1 | 2.6694060   | 14.2292560  | 6.9787000   | 6 | 2.0722430   | 13.3247360  | 6.6380820   |
| 1 | 2.2969210   | 12.4692920  | 6.8361010   | 1 | 1.9098980   | 13.4959320  | 5.5594570   |

|   |            |            |             |   |            |            |            |
|---|------------|------------|-------------|---|------------|------------|------------|
| 6 | -4.0768840 | 14.0079590 | 5.9350050   | 1 | 2.7947460  | 14.0628610 | 7.0369680  |
| 1 | -3.4506420 | 14.7833600 | 5.4523740   | 1 | 2.4525630  | 12.3040530 | 6.8195450  |
| 1 | -4.2797090 | 13.2311260 | 5.1747040   | 6 | -3.9469680 | 13.8034670 | 6.2402050  |
| 1 | -5.0328250 | 14.4333930 | 6.2997780   | 1 | -3.3531940 | 14.6401570 | 5.8244100  |
| 6 | -2.6119050 | 13.9107800 | -9.4847800  | 1 | -4.1172250 | 13.0926850 | 5.4112710  |
| 1 | -1.8375390 | 14.6965260 | -9.4360340  | 1 | -4.9154410 | 14.1599520 | 6.6436480  |
| 1 | -2.2678770 | 13.1102190 | -10.1685120 | 6 | -3.3508810 | 14.0100140 | -9.2356160 |
| 1 | -3.5523870 | 14.3614700 | -9.8580570  | 1 | -2.6584860 | 14.8701820 | -9.2170110 |
| 6 | 1.0980180  | 13.2407640 | -9.1828710  | 1 | -2.9602100 | 13.2507100 | -9.9404140 |
| 1 | 0.2861150  | 13.3713260 | -9.9196270  | 1 | -4.3479870 | 14.3646850 | -9.5627860 |
| 1 | 1.9185110  | 13.9611140 | -9.3711080  | 6 | 0.4352100  | 13.6762360 | -9.0978170 |
| 1 | 1.4454340  | 12.1977290 | -9.2983350  | 1 | -0.4143360 | 13.7450900 | -9.8001570 |
| 6 | 0.1102100  | 15.2636390 | -7.2940920  | 1 | 1.1869760  | 14.4610430 | -9.3133990 |
| 1 | -0.2361400 | 15.4727550 | -6.2627500  | 1 | 0.8598290  | 12.6650690 | -9.2368670 |
| 1 | 1.0327370  | 15.8362580 | -7.5135440  | 6 | -0.6584970 | 15.5969870 | -7.1600270 |
| 1 | -0.6751030 | 15.5716250 | -8.0066490  | 1 | -0.9756490 | 15.7688650 | -6.1120810 |
| 6 | -3.5527840 | 14.5930190 | -6.7890740  | 1 | 0.1984420  | 16.2508260 | -7.4152100 |
| 1 | -3.8690910 | 14.1938030 | -5.8081800  | 1 | -1.4990110 | 15.8339940 | -7.8355770 |
| 1 | -2.7529550 | 15.3223970 | -6.5711120  | 6 | -4.2036890 | 14.6044060 | -6.4924100 |
| 1 | -4.3952630 | 15.0826640 | -7.3164920  | 1 | -4.4503150 | 14.1750820 | -5.5043760 |
| 6 | -4.3912240 | 12.1298490 | -8.0918360  | 1 | -3.4524480 | 15.3897270 | -6.2985370 |
| 1 | -4.0841130 | 11.3102430 | -8.7674750  | 1 | -5.1005790 | 15.0327730 | -6.9821410 |
| 1 | -4.7442340 | 11.7218570 | -7.1280170  | 6 | -4.8959020 | 12.0792400 | -7.7604510 |
| 1 | -5.1963400 | 12.7328890 | -8.5547820  | 1 | -4.5584590 | 11.2933020 | -8.4605990 |
| 6 | 1.9603180  | 13.2522170 | -6.4024410  | 1 | -5.1576970 | 11.6386080 | -6.7820280 |
| 1 | 2.3507550  | 12.2240980 | -6.5052460  | 1 | -5.7748030 | 12.6125440 | -8.1719070 |
| 1 | 2.7375180  | 13.9748380 | -6.7184900  | 6 | 1.3954820  | 13.7642230 | -6.3447610 |
| 1 | 1.6537160  | 13.4468910 | -5.3579560  | 1 | 1.8817120  | 12.7804410 | -6.4706180 |
| 6 | 13.7166140 | -4.2469200 | -9.4864460  | 1 | 2.0877110  | 14.5629230 | -6.6750450 |
| 1 | 13.0244190 | -4.3951200 | -10.3334170 | 1 | 1.1042440  | 13.9178820 | -5.2886110 |
| 1 | 14.4753240 | -3.4840720 | -9.7487030  | 6 | 14.0041070 | -4.9234120 | -8.6372210 |
| 1 | 14.2320780 | -5.1839550 | -9.2168660  | 1 | 13.3777300 | -5.2133720 | -9.4987950 |
| 6 | 12.2297120 | -1.9331710 | -8.5799370  | 1 | 14.7885640 | -4.2117240 | -8.9607940 |
| 1 | 11.4080140 | -2.0038180 | -9.3142930  | 1 | 14.4884310 | -5.8020360 | -8.1796070 |
| 1 | 11.8871750 | -1.3675980 | -7.6948820  | 6 | 12.4430510 | -2.5202960 | -8.2891570 |
| 1 | 13.1026310 | -1.4176270 | -9.0253720  | 1 | 11.6851990 | -2.7506330 | -9.0596180 |
| 6 | 11.0235630 | -7.0348360 | -10.0575200 | 1 | 12.0221160 | -1.8062630 | -7.5588840 |
| 1 | 9.9624590  | -6.7748240 | -10.2229400 | 1 | 13.3448970 | -2.0774620 | -8.7545830 |
| 1 | 11.6188060 | -6.3099090 | -10.6377150 | 6 | 11.4863280 | -7.8590600 | -8.7954410 |
| 1 | 11.2447000 | -8.0733830 | -10.3738600 | 1 | 10.4428770 | -7.6771050 | -9.1111680 |
| 6 | 10.3948770 | -8.2016760 | -7.4828110  | 1 | 12.1235230 | -7.2439930 | -9.4529880 |
| 1 | 10.6250430 | -9.1631130 | -7.9813950  | 1 | 11.7558940 | -8.9309410 | -8.8723600 |
| 1 | 10.6692060 | -8.2511140 | -6.4142800  | 6 | 10.6197340 | -8.5043650 | -6.1067510 |
| 1 | 9.3202710  | -7.9763550 | -7.6000800  | 1 | 10.9233190 | -9.5362290 | -6.3694580 |
| 6 | 13.9786630 | -3.3499180 | -6.7267570  | 1 | 10.7841140 | -8.3220170 | -5.0300800 |
| 1 | 14.3812920 | -4.3231570 | -6.3860950  | 1 | 9.5575720  | -8.3569020 | -6.3702660 |
| 1 | 14.7845940 | -2.6906420 | -7.1056180  | 6 | 14.0477360 | -3.5403470 | -6.0691290 |
| 1 | 13.4855230 | -2.8805690 | -5.8559440  | 1 | 14.4276260 | -4.4238990 | -5.5207750 |
| 6 | 13.1275930 | -7.5116930 | -8.1065430  | 1 | 14.8807960 | -2.9488950 | -6.4982510 |
| 1 | 13.7668320 | -7.0491790 | -8.8786800  | 1 | 13.4859910 | -2.9309880 | -5.3379410 |
| 1 | 13.5337360 | -7.2853350 | -7.1034680  | 6 | 13.3839370 | -7.8303350 | -6.5777590 |
| 1 | 13.1076500 | -8.6056040 | -8.2778680  | 1 | 14.1007570 | -7.5010300 | -7.3500460 |
| 6 | 11.5168360 | -2.9041700 | 9.6421680   | 1 | 13.6652320 | -7.3954190 | -5.6008590 |
| 1 | 11.0811550 | -3.5464630 | 10.4315610  | 1 | 13.4121980 | -8.9362630 | -6.5259740 |
| 1 | 12.3354600 | -2.2731820 | 10.0415900  | 6 | 12.4000840 | -2.7023140 | 8.4187220  |
| 1 | 10.6988590 | -2.2652450 | 9.2614990   | 1 | 12.0562460 | -3.2073940 | 9.3419720  |

|    |            |            |             |    |            |            |             |
|----|------------|------------|-------------|----|------------|------------|-------------|
| 6  | 12.9175740 | -2.7612230 | 7.0859650   | 1  | 13.3170260 | -2.1074570 | 8.6006200   |
| 1  | 12.1750830 | -1.9833330 | 6.8327350   | 1  | 11.5791860 | -2.0387280 | 8.0897340   |
| 1  | 13.7960660 | -2.2838450 | 7.5618880   | 6  | 13.3565220 | -2.9897230 | 5.6749980   |
| 1  | 13.2232410 | -3.2969320 | 6.1694860   | 1  | 12.6389070 | -2.1856730 | 5.4330750   |
| 6  | 13.6122190 | -4.8254960 | 8.9929190   | 1  | 14.3312230 | -2.5388310 | 5.9447700   |
| 1  | 13.2969200 | -5.4611860 | 9.8370780   | 1  | 13.4743580 | -3.6609910 | 4.8058960   |
| 1  | 14.0756990 | -5.4240350 | 8.1894300   | 6  | 14.2107820 | -4.8759420 | 7.6932830   |
| 1  | 14.3295580 | -4.0675210 | 9.3632490   | 1  | 13.9978180 | -5.3862640 | 8.6474480   |
| 6  | 12.3336330 | -8.1443680 | 7.4527180   | 1  | 14.4879760 | -5.5967410 | 6.9041740   |
| 1  | 12.1805840 | -8.2338680 | 6.3618850   | 1  | 15.0340520 | -4.1521160 | 7.8504170   |
| 1  | 13.2661690 | -7.5722380 | 7.5919690   | 6  | 12.4799020 | -8.2075920 | 6.8148300   |
| 1  | 12.4018840 | -9.1376600 | 7.9387010   | 1  | 12.1441340 | -8.4042710 | 5.7806660   |
| 6  | 11.1903540 | -7.3180140 | 10.0000860  | 1  | 13.4590460 | -7.7057470 | 6.7384540   |
| 1  | 11.0386800 | -8.3673580 | 10.3197540  | 1  | 12.5606260 | -9.1418270 | 7.4048750   |
| 1  | 12.2293860 | -7.0279890 | 10.2353080  | 6  | 11.8274110 | -7.0202510 | 9.3875460   |
| 1  | 10.4910140 | -6.6470890 | 10.5317590  | 1  | 11.6517290 | -8.0105480 | 9.8512690   |
| 6  | 9.4840960  | -8.3619590 | 7.9185470   | 1  | 12.9105090 | -6.8082060 | 9.4222310   |
| 1  | 9.2801830  | -8.4696360 | 6.8386590   | 1  | 11.2812600 | -6.2325390 | 9.9378110   |
| 1  | 9.7350690  | -9.3524090 | 8.3450880   | 6  | 9.7353030  | -8.1276300 | 7.7380850   |
| 1  | 8.6102370  | -7.9331100 | 8.4398920   | 1  | 9.3514200  | -8.3376040 | 6.7241780   |
| 16 | 8.3562400  | -4.7903280 | 10.3405690  | 1  | 9.9832980  | -9.0820240 | 8.2415680   |
| 8  | 8.0898050  | -6.0234350 | 9.5075890   | 1  | 8.9897710  | -7.5677370 | 8.3297990   |
| 8  | 8.1750480  | -3.4856170 | 9.6142720   | 16 | 9.2833660  | -4.2234540 | 9.8714870   |
| 8  | 9.5765680  | -4.8798180 | 11.2137460  | 8  | 8.7851160  | -5.5015470 | 9.2352780   |
| 6  | 6.9039590  | -4.8027020 | 11.5669650  | 8  | 9.0463550  | -2.9790100 | 9.0617830   |
| 9  | 6.9658340  | -3.7340310 | 12.3882490  | 8  | 10.6424530 | -4.3324130 | 10.5055930  |
| 9  | 6.9284930  | -5.9263120 | 12.3152140  | 6  | 8.1036760  | -4.0109220 | 11.3467230  |
| 9  | 5.7317700  | -4.7609320 | 10.8914760  | 9  | 8.4036690  | -2.8904400 | 12.0360420  |
| 16 | -7.9226080 | -5.4137460 | -10.7759790 | 9  | 8.1964270  | -5.0698440 | 12.1793800  |
| 8  | -8.0214630 | -4.2000430 | -9.8937370  | 9  | 6.8270460  | -3.9192820 | 10.9076020  |
| 8  | -9.1432730 | -5.7149780 | -11.6003560 | 16 | -7.7150920 | -5.4147500 | -10.8297510 |
| 8  | -7.2946560 | -6.6251040 | -10.1239880 | 8  | -7.8143930 | -4.2071530 | -9.9390840  |
| 6  | -6.6101320 | -4.9126010 | -12.0565270 | 8  | -8.9180540 | -5.6836510 | -11.6905880 |
| 9  | -6.4168570 | -5.9094510 | -12.9465820 | 8  | -7.1291370 | -6.6441920 | -10.1730800 |
| 9  | -5.4352750 | -4.6562400 | -11.4353830 | 6  | -6.3603230 | -4.9271540 | -12.0708560 |
| 9  | -6.9946690 | -3.8050310 | -12.7241920 | 9  | -6.1589250 | -5.9219730 | -12.9613360 |
| 16 | 13.0653660 | -6.2173570 | -4.5063720  | 9  | -5.1984520 | -4.6919250 | -11.4179030 |
| 8  | 11.8930630 | -7.0649380 | -4.9489130  | 9  | -6.7102340 | -3.8100730 | -12.7420800 |
| 8  | 12.6962960 | -4.8573870 | -3.9807770  | 16 | 12.9367790 | -5.8195020 | -3.3558830  |
| 8  | 14.2439830 | -6.2491080 | -5.4394520  | 8  | 11.8261550 | -6.7581300 | -3.7796040  |
| 6  | 13.6740460 | -7.1377750 | -2.9583330  | 8  | 12.5270200 | -4.3754310 | -3.2379910  |
| 9  | 12.6745900 | -7.2212940 | -2.0504510  | 8  | 14.2466810 | -6.0615870 | -4.0499990  |
| 9  | 14.7150680 | -6.4906430 | -2.3982080  | 6  | 13.2254630 | -6.3351190 | -1.5468160  |
| 9  | 14.0638980 | -8.3887140 | -3.2852330  | 9  | 12.0690930 | -6.1934960 | -0.8598940  |
| 16 | -6.9325690 | -5.5565790 | 10.4850200  | 9  | 14.1705170 | -5.5655680 | -0.9745710  |
| 8  | -8.2882860 | -5.8454790 | 11.0677970  | 9  | 13.6137600 | -7.6247680 | -1.4884930  |
| 8  | -6.8315840 | -4.2606660 | 9.7268260   | 16 | -7.5122240 | -5.5809190 | 10.5896750  |
| 8  | -6.2498040 | -6.7304380 | 9.8197220   | 8  | -8.8851270 | -5.8837650 | 11.1227480  |
| 6  | -5.8537110 | -5.2705740 | 12.0230880  | 8  | -7.3926250 | -4.2747450 | 9.8521550   |
| 9  | -6.3392940 | -4.2483180 | 12.7586820  | 8  | -6.8011290 | -6.7431560 | 9.9331290   |
| 9  | -4.5849090 | -4.9799130 | 11.6635050  | 6  | -6.4868620 | -5.3102040 | 12.1666110  |
| 9  | -5.8412890 | -6.3855740 | 12.7884020  | 9  | -7.0035510 | -4.3020300 | 12.9001820  |
| 16 | -1.4176610 | 14.3415200 | -3.8338960  | 9  | -5.2087640 | -5.0064880 | 11.8535350  |
| 8  | -2.6553750 | 13.4883820 | -3.9899050  | 9  | -6.4916700 | -6.4362130 | 12.9162210  |
| 8  | -1.4653850 | 15.6702580 | -4.5234360  | 16 | -1.9297510 | 14.4658390 | -3.6302390  |
| 8  | -0.1132240 | 13.5925750 | -4.0024010  | 8  | -3.0943480 | 13.5132340 | -3.7760060  |



|    |             |             |             |    |             |             |             |
|----|-------------|-------------|-------------|----|-------------|-------------|-------------|
| 6  | -1.4367540  | 14.7374300  | -1.9721150  | 8  | -2.0979610  | 15.7907580  | -4.3088440  |
| 9  | -2.5469270  | 15.4285490  | -1.6520540  | 8  | -0.5707540  | 13.8281900  | -3.8207020  |
| 9  | -0.3526870  | 15.4627540  | -1.6286910  | 6  | -1.9544400  | 14.8481160  | -1.7654090  |
| 9  | -1.4252770  | 13.5780960  | -1.2733770  | 9  | -3.0893800  | 15.4922380  | -1.4326420  |
| 16 | 9.4272040   | -3.7948950  | -10.4774260 | 9  | -0.8980710  | 15.6142880  | -1.4244000  |
| 8  | 8.6543980   | -4.9929820  | -9.9782660  | 9  | -1.8919920  | 13.6857530  | -1.0757990  |
| 8  | 10.8886700  | -4.0273610  | -10.7448100 | 16 | 9.8606790   | -4.8309050  | -10.0560080 |
| 8  | 9.1171930   | -2.5073490  | -9.7593140  | 8  | 9.0753830   | -5.9189830  | -9.3616620  |
| 6  | 8.7090740   | -3.5250950  | -12.2163070 | 8  | 11.3380910  | -5.0756020  | -10.1817290 |
| 9  | 9.2984870   | -2.4653870  | -12.8097480 | 8  | 9.4883300   | -3.4297250  | -9.6449740  |
| 9  | 7.3795930   | -3.2991260  | -12.1490050 | 6  | 9.2445370   | -4.9496900  | -11.8502140 |
| 9  | 8.9237710   | -4.6213260  | -12.9774110 | 9  | 9.8645840   | -4.0330790  | -12.6229690 |
| 16 | 13.0958640  | -5.8373870  | 4.7306580   | 9  | 7.9126750   | -4.7331450  | -11.9058810 |
| 8  | 12.7431780  | -4.4889790  | 4.1567490   | 9  | 9.5032990   | -6.1799870  | -12.3464320 |
| 8  | 12.0051880  | -6.8755380  | 4.6020830   | 16 | 12.8673640  | -6.3164090  | 3.7225290   |
| 8  | 13.7940010  | -5.7879680  | 6.0611100   | 8  | 12.4678480  | -5.0321140  | 3.0447180   |
| 6  | 14.4386900  | -6.4936080  | 3.5562780   | 8  | 11.7298390  | -7.2889040  | 3.9380320   |
| 9  | 13.9606310  | -6.5829270  | 2.2981190   | 8  | 13.8051020  | -6.1466730  | 4.8860030   |
| 9  | 14.8374750  | -7.7215590  | 3.9574880   | 6  | 13.9324020  | -7.2083390  | 2.4233930   |
| 9  | 15.5082960  | -5.6704210  | 3.5577900   | 9  | 13.1713530  | -7.5744140  | 1.3698870   |
| 16 | -1.2149500  | 10.7809940  | 9.9614710   | 9  | 14.4786840  | -8.3200130  | 2.9659770   |
| 8  | -1.7748950  | 12.1677130  | 10.1181280  | 9  | 14.9230200  | -6.4054530  | 1.9885680   |
| 8  | 0.1748760   | 10.6971800  | 9.3740380   | 16 | -0.9501360  | 10.4247340  | 10.0665090  |
| 8  | -2.1873110  | 9.7696720   | 9.4126180   | 8  | -1.5050390  | 11.8027810  | 10.2961100  |
| 6  | -0.9409950  | 10.2200730  | 11.7565410  | 8  | 0.4123830   | 10.3668410  | 9.4156380   |
| 9  | -0.4456760  | 8.9642680   | 11.7881280  | 8  | -1.9446330  | 9.4306330   | 9.5254560   |
| 9  | -2.1032840  | 10.2440240  | 12.4424120  | 6  | -0.5954130  | 9.8002100   | 11.8262140  |
| 9  | -0.0619780  | 11.0466870  | 12.3665890  | 9  | -0.0993990  | 8.5448200   | 11.7899030  |
| 16 | -1.1792320  | 14.4433660  | 3.5437140   | 9  | -1.7253410  | 9.7977740   | 12.5645290  |
| 8  | -1.8083040  | 15.5706490  | 4.3136880   | 9  | 0.3104660   | 10.6057170  | 12.4250840  |
| 8  | -2.1068710  | 13.3211080  | 3.1640300   | 16 | -1.2028970  | 14.3221520  | 3.7661120   |
| 8  | 0.1642020   | 13.9955940  | 4.0759900   | 8  | -1.7408930  | 15.4597890  | 4.5863240   |
| 6  | -0.7170770  | 15.2019330  | 1.8614170   | 8  | -2.1848930  | 13.2213820  | 3.4665460   |
| 9  | -1.8269030  | 15.5633690  | 1.1859680   | 8  | 0.1713220   | 13.8463370  | 4.1845880   |
| 9  | -0.0374280  | 14.2904190  | 1.1304060   | 6  | -0.8700030  | 15.0717210  | 2.0495450   |
| 9  | 0.0637570   | 16.2888030  | 2.0315680   | 9  | -2.0219360  | 15.4968020  | 1.4914200   |
| 16 | -1.0070530  | 10.4634330  | -10.2985230 | 9  | -0.3154280  | 14.1327570  | 1.2506400   |
| 8  | -2.2927740  | 10.2276710  | -9.5376710  | 9  | -0.0202480  | 16.1150200  | 2.1443210   |
| 8  | 0.2523030   | 10.2018690  | -9.5077360  | 16 | -1.4792000  | 10.7606480  | -10.1903890 |
| 8  | -0.9931480  | 11.7080900  | -11.1321950 | 8  | -2.6997460  | 10.4399190  | -9.3556180  |
| 6  | -1.0093460  | 9.0354260   | -11.5535530 | 8  | -0.1609940  | 10.5738860  | -9.4790570  |
| 9  | -1.0387800  | 7.8520940   | -10.8939530 | 8  | -1.5942670  | 12.0090690  | -11.0099640 |
| 9  | 0.0998400   | 9.0720110   | -12.3205310 | 6  | -1.4718130  | 9.3424890   | -11.4564350 |
| 9  | -2.0931580  | 9.1069900   | -12.3541480 | 9  | -1.3987900  | 8.1550590   | -10.8071900 |
| 16 | -11.8398970 | -8.3401170  | -5.2109560  | 9  | -0.4115710  | 9.4453210   | -12.2838240 |
| 8  | -11.8111710 | -7.0341650  | -4.4597320  | 9  | -2.6014400  | 9.3586220   | -12.1945850 |
| 8  | -10.5166110 | -9.0687100  | -5.2482630  | 16 | -11.9173000 | -8.2510600  | -5.4402110  |
| 8  | -12.5986920 | -8.3004690  | -6.5084140  | 8  | -11.8933250 | -6.9511640  | -4.6780090  |
| 6  | -12.9093750 | -9.4687470  | -4.1180780  | 8  | -10.6069470 | -9.0035190  | -5.4320430  |
| 9  | -12.3636550 | -9.5909340  | -2.8897520  | 8  | -12.6241770 | -8.1872860  | -6.7657660  |
| 9  | -12.9989960 | -10.6969480 | -4.6762300  | 6  | -13.0479290 | -9.3679180  | -4.3980300  |
| 9  | -14.1531300 | -8.9602100  | -3.9917870  | 9  | -12.5507010 | -9.5095660  | -3.1513210  |
| 16 | -11.3175520 | -8.5869000  | 5.4329010   | 9  | -13.1386430 | -10.5898590 | -4.9696450  |
| 8  | -10.0848090 | -9.4227000  | 5.6966410   | 9  | -14.2861320 | -8.8378040  | -4.3136900  |
| 8  | -11.0401730 | -7.3000680  | 4.7000520   | 16 | -11.6197640 | -8.6433600  | 5.3475780   |
| 8  | -12.2780530 | -8.4921850  | 6.5818090   | 8  | -10.3983210 | -9.4691170  | 5.6849670   |

|   |             |             |           |
|---|-------------|-------------|-----------|
| 6 | -12.2521500 | -9.6272790  | 4.1467940 |
| 9 | -11.4903350 | -9.8034610  | 3.0443130 |
| 9 | -13.3986950 | -9.0137870  | 3.7861900 |
| 9 | -12.5525460 | -10.8400070 | 4.6613740 |

|   |             |             |           |
|---|-------------|-------------|-----------|
| 8 | -11.3077330 | -7.3624900  | 4.6171180 |
| 8 | -12.6422540 | -8.5412120  | 6.4406680 |
| 6 | -12.4728900 | -9.7030220  | 4.0213080 |
| 9 | -11.6393560 | -9.8976070  | 2.9748770 |
| 9 | -13.5921860 | -9.0960330  | 3.5748250 |
| 9 | -12.8082260 | -10.9071650 | 4.5345560 |

## References:

- 1 A. D. Becke, *Phys. Rev. A* 1988, **38**, 3098-3100.
- 2 C. Lee, W. Yang and R. G. Parr, *Phys. Rev. B* 1988, **37**, 785-789.
- 3 F. Weigend and R. Ahlrichs, *Phys. Chem. Chem. Phys.* 2005, **7**, 3297-3305.
- 4 F. Weigend, *Phys. Chem. Chem. Phys.* 2006, **8**, 1057-1065.
- 5 S. Grimme, J. Antony, S. Ehrlich and H. Krieg, *J. Chem. Phys.* 2010, **132**, 154104.
- 6 S. Grimme, S. Ehrlich and L. Goerigk, *J. Comput. Chem.* 2011, **32**, 1456-1465.
- 7 S. Hirata and M. Head-Gordon, *Chem. Phys. Lett.* 1999, **314**, 291-299.
- 8 T. Yanai, D. P. Tew and N. C. Handy, *Chem. Phys. Lett.* 2004, **393**, 51-57.
- 9 Gaussian 16, Revision A.03, M. J. Frisch, G. W. Trucks, H. B. Schlegel, G. E. Scuseria, M. A. Robb, J. R. Cheeseman, G. Scalmani, V. Barone, G. A. Petersson, H. Nakatsuji, X. Li, M. Caricato, A. V. Marenich, J. Bloino, B. G. Janesko, R. Gomperts, B. Mennucci, H. P. Hratchian, J. V. Ortiz, A. F. Izmaylov, J. L. Sonnenberg, D. Williams-Young, F. Ding, F. Lipparini, F. Egidi, J. Goings, B. Peng, A. Petrone, T. Henderson, D. Ranasinghe, V. G. Zakrzewski, J. Gao, N. Rega, G. Zheng, W. Liang, M. Hada, M. Ehara, K. Toyota, R. Fukuda, J. Hasegawa, M. Ishida, T. Nakajima, Y. Honda, O. Kitao, H. Nakai, T. Vreven, K. Throssell, J. A. Montgomery, Jr., J. E. Peralta, F. Ogliaro, M. J. Bearpark, J. J. Heyd, E. N. Brothers, K. N. Kudin, V. N. Staroverov, T. A. Keith, R. Kobayashi, J. Normand, K. Raghavachari, A. P. Rendell, J. C. Burant, S. S. Iyengar, J. Tomasi, M. Cossi, J. M. Millam, M. Klene, C. Adamo, R. Cammi, J. W. Ochterski, R. L. Martin, K. Morokuma, O. Farkas, J. B. Foresman, and D. J. Fox, Gaussian, Inc., Wallingford CT, 2016.
- 10 R. S. Mulliken, *J. Chem. Phys.* 1955, **23**, 1833-1840.
- 11 R. S. Mulliken, *J. Chem. Phys.* 1955, **23**, 1841-1846.
- 12 P. O. Löwdin, *J. Chem. Phys.* 1950, **18**, 365-375.
- 13 F. L. Hirshfeld, *Theor. Chim. Acta* 1977, **44**, 129-138.
- 14 A. V. Marenich, S. V. Jerome, C. J. Cramer, D.G. Truhlar, *J. Chem. Theory Comput.* 2012, **8**, 527-541.
- 15 K. Eichkorn, F. Weigend, O. Treutler, R. Ahlrichs; *Theor. Chem. Acc.* 1997, **97**, 119.
- 16 K. Morokuma, *J. Chem. Phys.* 1971, **55**, 1236-1244.
- 17 F. M. Bickelhaupt, E. J. Baerends, in *Reviews in Computational Chemistry*, vol. 15 (Eds.: K.B. Lipkowitz, D.B. Boyd), John Wiley & Sons, Inc., 2000, pp. 1-86.
- 18 ADF 2018, SCM, Theoretical Chemistry, Vrije Universiteit, Amsterdam, The Netherlands, E.J. Baerends, T. Ziegler, A.J. Atkins, J. Autschbach, O. Baseggio, D. Bashford, A. Bérces, F.M. Bickelhaupt, C. Bo, P.M. Boerrigter, L. Cavallo, C. Daul, D.P. Chong, D.V. Chulhai, L. Deng, R.M. Dickson, J.M. Dieterich, D.E. Ellis, M. van Faassen, L. Fan, T.H. Fischer, A. Förster, C. Fonseca Guerra, M. Franchini, A. Ghysels, A. Giammona, S.J.A. van Gisbergen, A. Goetz, A.W. Götz, J.A. Groeneveld, O.V. Gritsenko, M. Grüning, S. Gusarov, F.E. Harris, P. van den Hoek, Z. Hu, C.R. Jacob, H. Jacobsen, L. Jensen, L. Joubert, J.W. Kaminski, G. van Kessel, C. König, F. Kootstra, A. Kovalenko, M.V. Krykunov, E. van Lenthe, D.A. McCormack, A. Michalak, M. Mitoraj, S.M. Morton, J. Neugebauer, V.P. Nicu, L. Noodleman, V.P. Osinga, S. Patchkovskii, M. Pavanello, C.A. Peebles, P.H.T. Philipsen, D. Post, C.C. Pye, H. Ramanantoanina, P. Ramos, W. Ravenek, J.I. Rodríguez, P. Ros, R. Rüger, P.R.T. Schipper, D. Schlüns, H. van Schoot, G. Schreckenbach, J.S. Seldenthuis, M. Seth, J.G. Snijders, M. Solà, M. Stener,

- M. Swart, D. Swerhone, V. Tognetti, G. te Velde, P. Vernooijs, L. Versluis, L. Visscher, O. Visser, F. Wang, T.A. Wesolowski, E.M. van Wezenbeek, G. Wiesenekker, S.K. Wolff, T.K. Woo, A.L. Yakovlev
- 19 G. A. Zhurko, Chemcraft 1.80 (build 523b) - graphical program for visualization of quantum chemistry computations. (<https://chemcraftprog.com>).
  - 20 T. Ziegler and A. Rauk, *Theor. Chim. Acta* 1977, **46**, 1-10.
  - 21 T. Ziegler and A. Rauk, *Inorg. Chem.* 1979, **18**, 1558-1565.
  - 22 T. Ziegler and A. Rauk, *Inorg. Chem.* 1979, **18**, 1755-1759.
  - 23 S. Grimme, *J. Comput. Chem.* 2004, **25**, 1463-1473.
  - 24 S. Grimme, *J. Comput. Chem.* 2006, **27**, 1787-1799.
  - 25 F. Plasser and H. Lischka, *J. Chem. Theory Comput.* 2012, **8**, 2777-2789.
  - 26 F. Plasser, S. A. Bäßler, M. Wormit and A. Dreuw, *J. Chem. Phys.* 2014, **141**, 024107.
  - 27 A. V. Luzanov and O. A. Zhikol, *Int. J. Quantum Chem.* 2010, **110**, 902-924.
  - 28 A. Klamt, G. Schüürmann, *J. Chem. Soc. Perkin Trans.* 1993, **2**, 799-805.
  - 29 J. Tomasi, B. Mennucci and R. Cammi, *Chem. Rev.* 2005, **105**, 2999-3093.
  - 30 A. A. Voityuk and S. F. Vyboishchikov, *Phys. Chem. Chem. Phys.* 2019, **21**, 18706-18713.
  - 31 S. F. Vyboishchikov and A. A. Voityuk, *Phys. Chem. Chem. Phys.* 2020, **22**, 14591-14598.
  - 32 A. Klamt, G. Schüürmann, *J. Chem. Soc. Perkin Trans.* 1993, **2**, 799-805.
  - 33 J. L. Pascual-Ahuir, E. Silla, and I. Tuñón, *J. Comp. Chem.* 1994, **15**, 1127-1138.
  - 34 A. Klamt, *J. Phys. Chem.* 1996, **100**, 3349-3353.
  - 35 R. A. Marcus and N. Sutin, *Biochim. Biophys. Acta, Rev. Bioenerg.* 1985, **811**, 265-322.
  - 36 A. A. Voityuk and N. Rösch, *J. Chem. Phys.* 2002, **117**, 5607-5616.
  - 37 A. A. Voityuk, *Phys. Chem. Chem. Phys.* 2012, **14**, 13789-13793.
  - 38 J. Ulstrup, J. Jortner, *J. Chem. Phys.* 1975, **63**, 4358-4368.
  - 39 J. Jortner, *J. Chem. Phys.* 1976, **64**, 4860-4867.
  - 40 R. F. W. Bader, *Chem. Rev.* 1991, **91**, 893-928.
  - 41 R. F. W. Bader, *Atoms in Molecules: A Quantum Theory*; International Series of Monographs on Chemistry 22; Oxford University Press: Oxford, U.K., **1990**.
  - 42 C. F. Matta, N. Castillo and R. J. Boyd, *J. Phys. Chem. B* 2006, **110**, 563-578.
  - 43 C. R. Wick and T. Clark, *J. Mol. Model.* 2018, **24**, 142.
  - 44 P. S. V. Kumar, V. Raghavendra and V. Subramanian, *J. Chem. Sci.* 2016, **128**, 1527-1536.
  - 45 Keith, T. A. AIMAll, version 14.06.21; TK Gristmill Software: Overland Park, KS, **2014**.
  - 46 E. Johnson, S. Keinan, P. Mori-Sánchez, J. Contreras-García, A. Cohen and W. Yang, *J. Am. Chem. Soc.* 2010, **132**, 6498-6506.
  - 47 J. Contreras-García, E. Johnson, S. Keinan, R. Chaudret, J. Piquemal, D. Beratan and W. Yang, *J. Chem. Theory Comput.* 2011, **7**, 625-632.
  - 48 J. Contreras-García, W. Yang and E. Johnson, *J. Phys. Chem. A*, 2011, **115**, 12983-12990.
  - 49 T. Lu and F. Chen, *J. Comput. Chem.* 2012, **33**, 580-592.
